# Supplementary material for: Gender disparities among hospitalised patients with acute myocardial infarction, acute decompensated heart failure or pneumonia: retrospective cohort study
Source: PubMed Central journal article supplement — BMJ Open. 2019 Jan 21;9(1):e022782. doi: 10.1136/bmjopen-2018-022782 (PMC6347873; doi:10.1136/bmjopen-2018-022782), 2019-01-21

**Supplementary Table 1: ICD9 codes used in ADHF:**

| <b>ICD-9</b> | <b>Frequency</b> | <b>%</b>   |
|--------------|------------------|------------|
| 428          | 8,665            | 70.65      |
| 428.1        | 97               | 0.79       |
| 428.2        | 7                | 0.06       |
| 428.21       | 305              | 2.49       |
| 428.22       | 99               | 0.81       |
| 428.23       | 1,021            | 8.32       |
| 428.3        | 24               | 0.2        |
| 428.31       | 243              | 1.98       |
| 428.32       | 80               | 0.65       |
| 428.33       | 787              | 6.42       |
| 428.4        | 6                | 0.05       |
| 428.41       | 109              | 0.89       |
| 428.42       | 50               | 0.41       |
| 428.43       | 742              | 6.05       |
| 428.9        | 30               | 0.24       |
| <b>Total</b> | <b>12,265</b>    | <b>100</b> |

Frequency: Number of patients that were diagnosed based on that code.

?: The percentage of the code out of total number of patients

**Supplementary Table 2: ICD9 codes used in AMI.**

| <b>ICD-9</b> | <b>Frequency</b> | <b>%</b>   |
|--------------|------------------|------------|
| 410          | 3                | 0.02       |
| 410.01       | 536              | 3.4        |
| 410.02       | 2                | 0.01       |
| 410.1        | 34               | 0.22       |
| 410.11       | 2,186            | 13.86      |
| 410.12       | 11               | 0.07       |
| 410.2        | 5                | 0.03       |
| 410.21       | 466              | 2.95       |
| 410.22       | 3                | 0.02       |
| 410.3        | 4                | 0.03       |
| 410.31       | 309              | 1.96       |
| 410.32       | 2                | 0.01       |
| 410.4        | 9                | 0.06       |
| 410.41       | 2,688            | 17.04      |
| 410.42       | 17               | 0.11       |
| 410.5        | 4                | 0.03       |
| 410.51       | 256              | 1.62       |
| 410.52       | 2                | 0.01       |
| 410.6        | 1                | 0.01       |
| 410.61       | 75               | 0.48       |
| 410.7        | 25               | 0.16       |
| 410.71       | 8,345            | 52.89      |
| 410.72       | 58               | 0.37       |
| 410.8        | 6                | 0.04       |
| 410.81       | 331              | 2.1        |
| 410.82       | 2                | 0.01       |
| 410.9        | 7                | 0.04       |
| 410.91       | 389              | 2.47       |
| 410.92       | 1                | 0.01       |
| <b>Total</b> | <b>15,777</b>    | <b>100</b> |

Frequency: Number of patients that were diagnosed based on that code.

%: The percentage of the code out of total number of patients

**Supplementary Table 3: ICD9 codes used in pneumonia:**

| <b>ICD-9</b> | <b>Frequency</b> | <b>%</b>   |
|--------------|------------------|------------|
| 11.6         | 1                | 0.01       |
| 11.64        | 1                | 0.01       |
| 52.1         | 10               | 0.08       |
| 73           | 2                | 0.02       |
| 115.05       | 68               | 0.53       |
| 115.95       | 29               | 0.22       |
| 480          | 1                | 0.01       |
| 480.1        | 67               | 0.52       |
| 480.2        | 1                | 0.01       |
| 480.3        | 1                | 0.01       |
| 480.8        | 12               | 0.09       |
| 480.9        | 57               | 0.44       |
| 481          | 431              | 3.33       |
| 482          | 68               | 0.53       |
| 482.1        | 208              | 1.61       |
| 482.2        | 163              | 1.26       |
| 482.3        | 57               | 0.44       |
| 482.31       | 11               | 0.09       |
| 482.32       | 6                | 0.05       |
| 482.39       | 15               | 0.12       |
| 482.4        | 66               | 0.51       |
| 482.41       | 140              | 1.08       |
| 482.42       | 57               | 0.44       |
| 482.49       | 2                | 0.02       |
| 482.81       | 8                | 0.06       |
| 482.82       | 33               | 0.26       |
| 482.83       | 118              | 0.91       |
| 482.84       | 46               | 0.36       |
| 482.89       | 42               | 0.32       |
| 482.9        | 143              | 1.11       |
| 483          | 25               | 0.19       |
| 483.8        | 5                | 0.04       |
| 484.1        | 3                | 0.02       |
| 484.6        | 1                | 0.01       |
| 485          | 104              | 0.8        |
| 486          | 8,520            | 65.9       |
| 487          | 234              | 1.81       |
| 495.8        | 4                | 0.03       |
| 495.9        | 62               | 0.48       |
| 506          | 12               | 0.09       |
| 507          | 2,081            | 16.1       |
| 507.1        | 6                | 0.05       |
| 507.8        | 2                | 0.02       |
| 997.32       | 6                | 0.05       |
| <b>Total</b> | <b>12,929</b>    | <b>100</b> |

Frequency: Number of patients that were diagnosed based on that code.

#: The percentage of the code out of total number of patients

**Supplementary Table 4: Comorbidities specified by OASH.**

|              |                          |            |               |
|--------------|--------------------------|------------|---------------|
| Dyslipidemia | Coronary Artery Disease  | Depression | COPD          |
| Arthritis    | Substance abuse          | Diabetes   | Dementia      |
| Osteoporosis | Congestive Heart Failure | Cancer     | Schizophrenia |
| Autism       | Chronic Kidney Disease   | Arrhythmia | Hepatitis     |
| Hypertension | Stroke                   | Asthma     | HIV           |

**Supplementary Table 5: List of ICD-9 codes used for the comorbidities:**

| <b>The condition</b>    | <b>ICD-9 codes used:</b>                                                                                                                                                                                                                                                                                                                                                                                                                                                                                                                                                                                                                                                                                                       |
|-------------------------|--------------------------------------------------------------------------------------------------------------------------------------------------------------------------------------------------------------------------------------------------------------------------------------------------------------------------------------------------------------------------------------------------------------------------------------------------------------------------------------------------------------------------------------------------------------------------------------------------------------------------------------------------------------------------------------------------------------------------------|
| Dyslipidemia            | 272.0, 272.1, 272.2, 272.3, 272.4                                                                                                                                                                                                                                                                                                                                                                                                                                                                                                                                                                                                                                                                                              |
| Arthritis               | 714.0, 714.1, 714.2, 714.30, 714.31, 714.32, 714.33, 715.00, 715.04, 715.09, 715.10, 715.11, 715.12, 715.13, 715.14, 715.15, 715.16, 715.17, 715.18, 715.20, 715.21, 715.22, 715.23, 715.24, 715.25, 715.26, 715.27, 715.28, 715.30, 715.31, 715.32, 715.33, 715.34, 715.35, 715.36, 715.37, 715.38, 715.80, 715.89, 715.90, 715.91, 715.92, 715.93, 715.94, 715.95, 715.96, 715.97, 715.98, 720.0, 721.0, 721.1, 721.2, 721.3, 721.90, 721.91                                                                                                                                                                                                                                                                                 |
| Osteoporosis            | 733.00, 733.01, 733.02, 733.03, 733.09                                                                                                                                                                                                                                                                                                                                                                                                                                                                                                                                                                                                                                                                                         |
| Hypertension            | 401.0, 401.1, 401.9, 402.00, 402.01, 402.10, 402.11, 402.90, 402.91, 403.00, 403.01, 403.10, 403.11, 403.90, 403.91, 404.00, 404.01, 404.02, 404.03, 404.10, 404.11, 404.12, 404.13, 404.90, 404.91, 404.92, 404.93, 405.01, 405.09, 405.11, 405.19, 405.91, 405.99, 362.11, 437.2                                                                                                                                                                                                                                                                                                                                                                                                                                             |
| Coronary Artery Disease | 410.00, 410.01, 410.02, 410.10, 410.11, 410.12, 410.20, 410.21, 410.22, 410.30, 410.31, 410.32, 410.40, 410.41, 410.42, 410.50, 410.51, 410.52, 410.60, 410.61, 410.62, 410.70, 410.71, 410.72, 410.80, 410.81, 410.82, 410.90, 410.91, 410.92, 411.0, 411.1, 411.81, 411.89, 412, 413.0, 413.1, 413.9, 414.00, 414.01, 414.02, 414.03, 414.04, 414.05, 414.06, 414.07, 414.12, 414.2, 414.3, 414.8, 414.9                                                                                                                                                                                                                                                                                                                     |
| COPD                    | 490, 491.0, 491.1, 491.20, 491.21, 491.22, 491.8, 491.9, 492.0, 492.8, 494.0, 494.1, 496                                                                                                                                                                                                                                                                                                                                                                                                                                                                                                                                                                                                                                       |
| Chronic Kidney Disease  | 016.00, 016.01, 016.02, 016.03, 016.04, 016.05, 016.06, 095.4, 189.0, 189.9, 223.0, 236.91, 249.40, 249.41, 250.40, 250.41, 250.42, 250.43, 271.4, 274.10, 283.11, 403.01, 403.11, 403.91, 404.02, 404.03, 404.12, 404.13, 404.92, 404.93, 440.1, 442.1, 572.4, 580.0, 580.4, 580.81, 580.89, 580.9, 581.0, 581.1, 581.2, 581.3, 581.81, 581.89, 581.9, 582.0, 582.1, 582.2, 582.4, 582.81, 582.89, 582.9, 583.0, 583.1, 583.2, 583.4, 583.6, 583.7, 583.81, 583.89, 583.9, 584.5, 584.6, 584.7, 584.8, 584.9, 585, 585.1, 585.2, 585.3, 585.4, 585.5, 585.6, 585.9, 586, 587, 588.0, 588.1, 588.81, 588.89, 588.9, 591, 753.12, 753.13, 753.14, 753.15, 753.16, 753.17, 753.19, 753.20, 753.21, 753.22, 753.23, 753.29, 794.4 |
| Stroke                  | 430, 431, 433.01, 433.11, 433.21, 433.31, 433.81, 433.91, 434.00, 434.01, 434.10, 434.11, 434.90, 434.91, 435.0, 435.1, 435.3, 435.8, 435.9, 436, 997.02                                                                                                                                                                                                                                                                                                                                                                                                                                                                                                                                                                       |
| Depression              | 296.20, 296.21, 296.22, 296.23, 296.24, 296.25, 296.26, 296.30, 296.31, 296.32, 296.33, 296.34, 296.35, 296.36, 296.51, 296.52, 296.53, 296.54, 296.55, 296.56, 296.60, 296.61, 296.62, 296.63, 296.64, 296.65, 296.66, 296.89, 298.0, 300.4, 309.1, 311                                                                                                                                                                                                                                                                                                                                                                                                                                                                       |
| Diabetes                | 249.00, 249.01, 249.10, 249.11, 249.20, 249.21, 249.30, 249.31, 249.40, 249.41, 249.50, 249.51, 249.60, 249.61, 249.70, 249.71, 249.80, 249.81, 249.90, 249.91, 250.00, 250.01, 250.02, 250.03,                                                                                                                                                                                                                                                                                                                                                                                                                                                                                                                                |

|                          |                                                                                                                                                                                                                                                                                                                                                                   |
|--------------------------|-------------------------------------------------------------------------------------------------------------------------------------------------------------------------------------------------------------------------------------------------------------------------------------------------------------------------------------------------------------------|
|                          | 250.10, 250.11, 250.12, 250.13, 250.20, 250.21, 250.22, 250.23, 250.30, 250.31, 250.32, 250.33, 250.40, 250.41, 250.42, 250.43, 250.50, 250.51, 250.52, 250.53, 250.60, 250.61, 250.62, 250.63, 250.70, 250.71, 250.72, 250.73, 250.80, 250.81, 250.82, 250.83, 250.90, 250.91, 250.92, 250.93, 357.2, 362.01, 362.02, 366.41                                     |
| Cancer                   | Female breast cancer: 174.0, 174.1, 174.2, 174.3, 174.4, 174.5, 174.6, 174.8, 174.9, 175.0, 175.9, 233.0, V10.3.<br>Colorectal cancer: 154.0, 154.1, 153.0, 153.1, 153.2, 153.3, 153.4, 153.5, 153.6, 153.7, 153.8, 153.9, 230.3, 230.4, V10.05.<br>Prostate cancer: 185, 233.4, V10.46.<br>Lung cancer: 162.2, 162.3, 162.4, 162.5, 162.8, 162.9, 231.2, V10.11. |
| Arrhythmia               | 427.31                                                                                                                                                                                                                                                                                                                                                            |
| Asthma                   | 493.00, 493.01, 493.02, 493.10, 493.11, 493.12, 493.20, 493.21, 493.22, 493.81, 493.82, 493.90, 493.91, 493.92                                                                                                                                                                                                                                                    |
| Congestive Heart Failure | 398.91, 402.01, 402.11, 402.91, 404.01, 404.11, 404.91, 404.03, 404.13, 404.93, 428.0, 428.1, 428.20, 428.21, 428.22, 428.23, 428.30, 428.31, 428.32, 428.33, 428.40, 428.41, 428.42, 428.43, 428.9                                                                                                                                                               |
| Dementia                 | 331.0, 331.1, 331.11, 331.19, 331.2, 331.7, 290.0, 290.10, 290.11, 290.12, 290.13, 290.20, 290.21, 290.3, 290.40, 290.41, 290.42, 290.43, 294.0, 294.10, 294.11, 294.8, 797                                                                                                                                                                                       |

**Supplementary Table 6: sensitivity analysis for the last 5 years of the study**

| <b>Last 5 years</b>       | <b>AMI</b>          | <b>ADHF</b>         | <b>Pneumonia</b>    |
|---------------------------|---------------------|---------------------|---------------------|
| <b>Men vs. Women</b>      | <b>OR (95% CI)</b>  | <b>OR (95% CI)</b>  | <b>OR (95% CI)</b>  |
| <b>30 day mortality</b>   | 1.02 (0.73 to 1.43) | 0.81 (0.62 to 1.06) | 1.12 (0.85 to 1.47) |
| <b>30 day readmission</b> | 0.85 (0.63 to 1.15) | 0.78 (0.63 to 0.97) | 0.94 (0.74 to 1.20) |

**Supplementary Table 7: sensitivity analysis for 15 day mortality and readmission**

| <b>Last 5 years</b>       | <b>AMI</b>          | <b>ADHF</b>         | <b>Pneumonia</b>    |
|---------------------------|---------------------|---------------------|---------------------|
| <b>Men vs. Women</b>      | <b>OR (95% CI)</b>  | <b>OR (95% CI)</b>  | <b>OR (95% CI)</b>  |
| <b>15 day mortality</b>   | 1.00 (0.88 to 1.15) | 0.88 (0.73 to 1.05) | 1.15 (1.00 to 1.33) |
| <b>15 day readmission</b> | 0.91 (0.81 to 1.03) | 0.93 (0.81 to 1.06) | 1.10 (0.96 to 1.27) |



Supplementary Figure 1: 30 day mortality in AMI

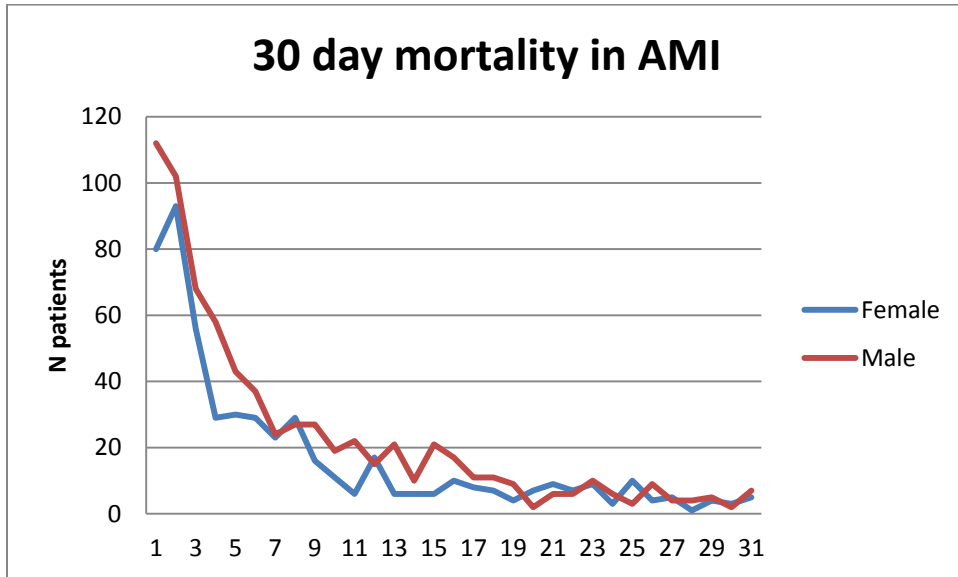

Supplementary Figure 2: 30 day mortality in ADHF

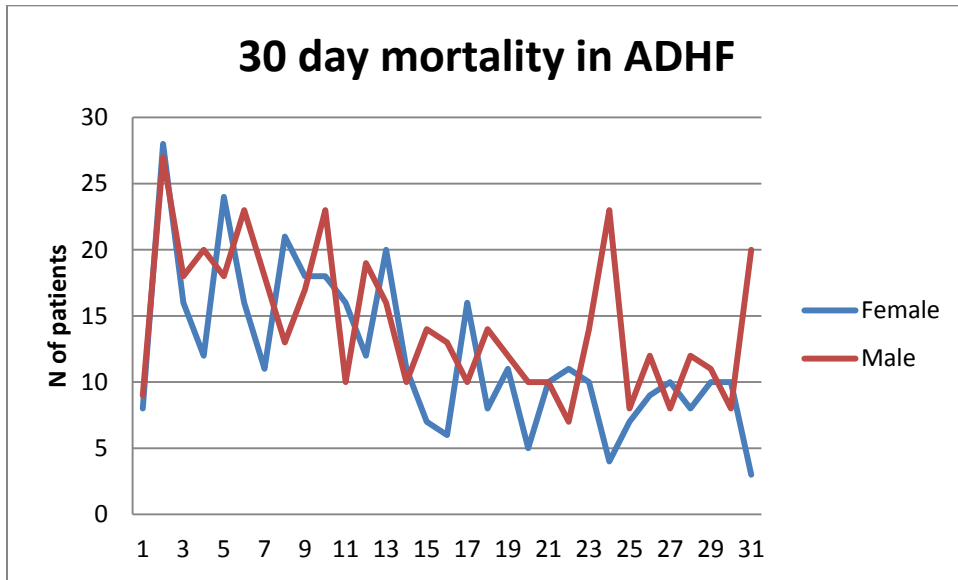

Supplementary Figure 3: 30 day mortality in pneumonia

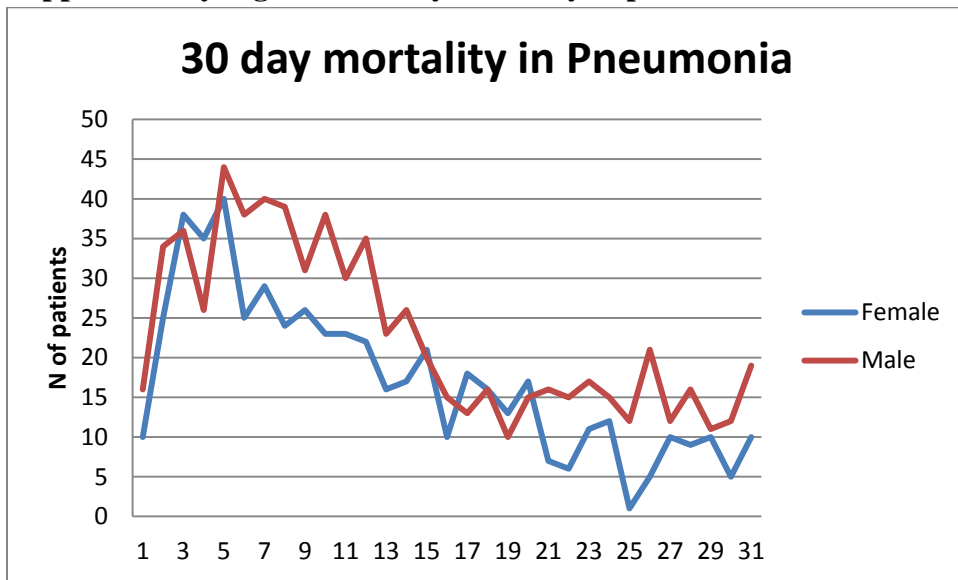

Supplementary Figure 4: 30 day readmission in AMI

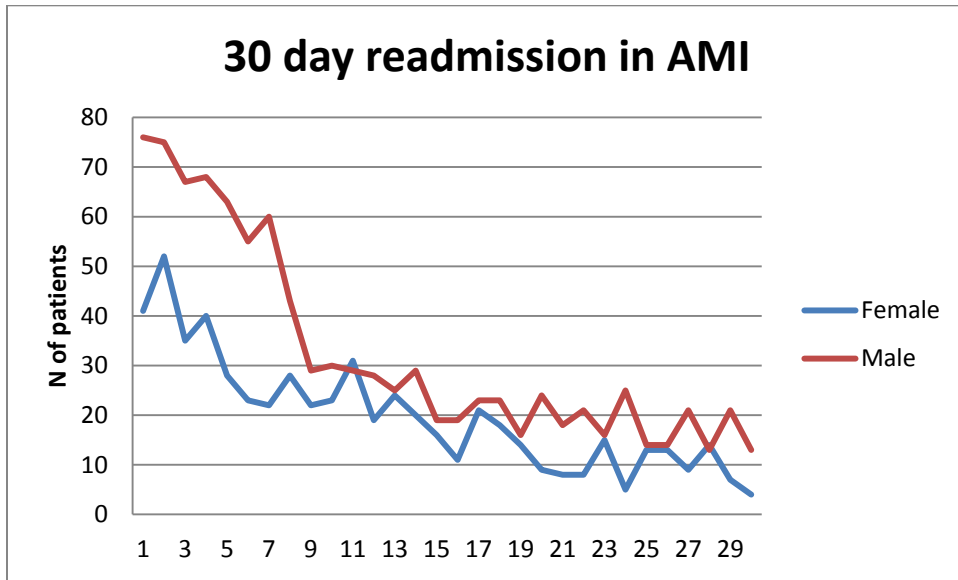

Supplementary Figure 5: 30 day readmission in ADHF

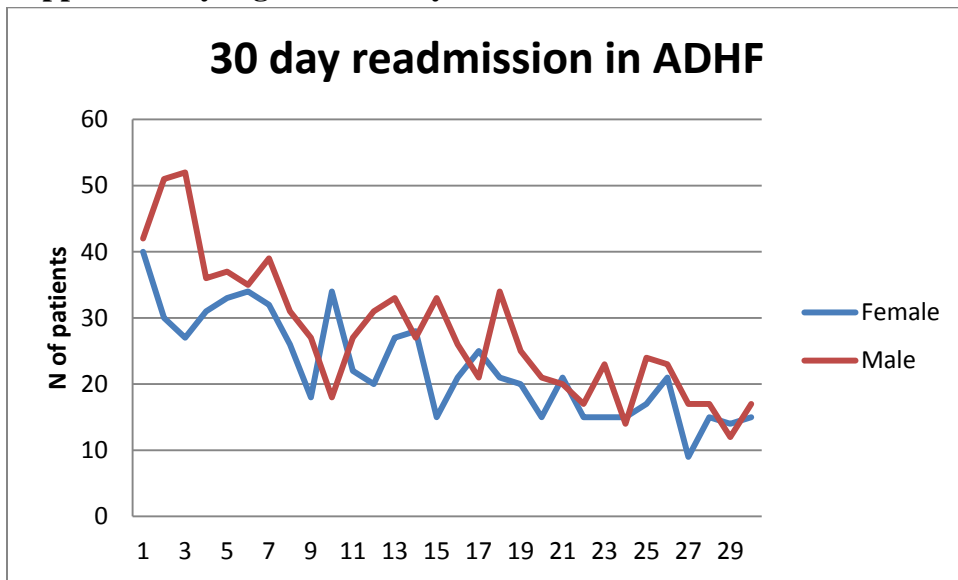

Supplementary Figure 6: 30 day readmission in pneumonia

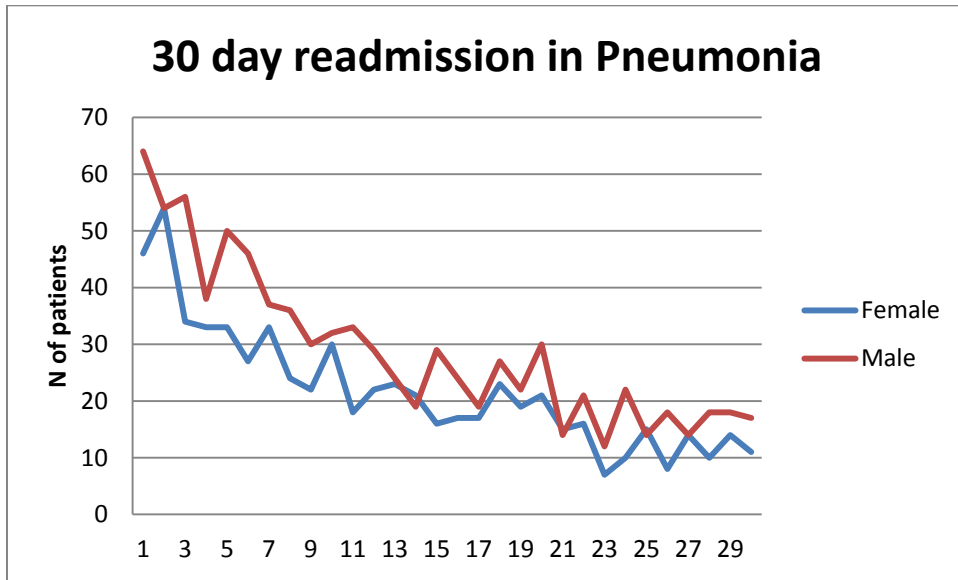

Supplement: bmjopen-2018-022782supp001.pdf [file bmjopen-2018-022782supp001.pdf]
