# Supplementary material for: Gender disparities among hospitalised patients with acute myocardial infarction, acute decompensated heart failure or pneumonia: retrospective cohort study
Source: PubMed Central journal article supplement — BMJ Open. 2019 Jan 21;9(1):e022782. doi: 10.1136/bmjopen-2018-022782 (PMC6347873; doi:10.1136/bmjopen-2018-022782), 2019-01-21
Supplement: bmjopen-2018-022782.draft_revisions.pdf [file bmjopen-2018-022782.draft_revisions.pdf]

# BMJ Open

BMJ Open is committed to open peer review. As part of this commitment we make the peer review history of every article we publish publicly available.

When an article is published we post the peer reviewers' comments and the authors' responses online. We also post the versions of the paper that were used during peer review. These are the versions that the peer review comments apply to.

The versions of the paper that follow are the versions that were submitted during the peer review process. They are not the versions of record or the final published versions. They should not be cited or distributed as the published version of this manuscript.

BMJ Open is an open access journal and the full, final, typeset and author-corrected version of record of the manuscript is available on our site with no access controls, subscription charges or pay-per-view fees (<http://bmjopen.bmj.com>).

If you have any questions on BMJ Open's open peer review process please email [info.bmjopen@bmj.com](mailto:info.bmjopen@bmj.com)

# BMJ Open

## Gender Disparities and Multimorbidity among Hospitalized Patients

|                               |                                                                                                                                                                  |
|-------------------------------|------------------------------------------------------------------------------------------------------------------------------------------------------------------|
| Journal:                      | <i>BMJ Open</i>                                                                                                                                                  |
| Manuscript ID                 | bmjopen-2018-022782                                                                                                                                              |
| Article Type:                 | Research                                                                                                                                                         |
| Date Submitted by the Author: | 07-May-2018                                                                                                                                                      |
| Complete List of Authors:     | alsawas, mouaz; Mayo Clinic, Wang, Zhen; Mayo Clinic, Murad, M. Hassan; Mayo Clinic Yousufuddin, Mohammed; Mayo Clinic Health System, Hospital Internal Medicine |
| Keywords:                     | INTERNAL MEDICINE, CARDIOLOGY, Respiratory infections < THORACIC MEDICINE                                                                                        |
|                               |                                                                                                                                                                  |

SCHOLARONE™  
Manuscripts

## Gender Disparities and Multimorbidity among Hospitalized Patients

Mouaz Alsawas\*, M.D., M.Sc.<sup>1</sup>; Zhen Wang, Ph.D<sup>1</sup>; M. Hassan Murad, M.D, M.P.H<sup>1</sup>; Mohammed Yousufuddin, M.D, M.Sc<sup>2</sup>.

<sup>1</sup>Evidence-based Practice Center, Mayo Clinic Robert D. and Patricia E. Kern Center for the Science of Health Care Delivery, Mayo Clinic, Rochester, MN.

<sup>2</sup>Department of Hospital Internal Medicine, Mayo Clinic Health System, Austin, Minnesota

\* Corresponding author:

Mouaz Alsawas, M.D., M.Sc

200 First Street SW

Rochester, MN 55902

Phone: (507)266-2441

Fax: 507 284 1731

Email: Alsawas.Mouaz@mayo.edu

**Abstract:**

**Objective:** To assess gender disparity in the prevalence of multimorbidity and outcomes among hospitalized patients with acute myocardial infarction (AMI), acute decompensated heart failure (ADHF), or pneumonia.

**Patients and Methods:** We conducted a retrospective study of adults hospitalized for AMI, ADHF, or pneumonia from January 1, 1995 through August 31, 2015. Patients were selected using ICD-9 codes. Comorbidities were chosen from the twenty chronic conditions, specified by the Office of the Assistant Secretary for Health. Logistic regression analysis was conducted adjusting for multiple confounders.

**Results:** We evaluated 12,265 patients with ADHF, 15,777 patients with AMI and 12,929 patients with pneumonia. Prevalence of comorbidities was significantly different between men and women in all 3 conditions. After adjusting for age, length of stay, multi-comorbidities, and residence, there was no significant difference in 30 day mortality between men and women in AMI or ADHF, but men with pneumonia had slightly higher 30 day mortality with an odds ratio (OR) of 1.19 (95% CI 1.06 to 1.34). There was no significant difference in 30 day readmission between men and women with AMI or pneumonia, but women with ADHF were slightly more likely to be readmitted within 30 days with OR 0.90 (95% CI 0.82 to 0.99).

**Conclusion:** Gender differences in the distribution of comorbidities exist in patients hospitalized with AMI, ADHF, and pneumonia. However, there is minimal clinically meaningful impact of these differences on outcomes. Efforts to address gender difference may need to be diverted towards targeting overall population health, reducing race/ethnicity disparity, and improving access to care.

## Article summary:

### Strengths and limitations of this study:

- The strengths of this study include the large sample size, multivariable adjustment and sensitivity analyses to assess robustness of findings.
- A limitation of this study is including all patients that were hospitalized in a single regional tertiary center; these patients were from several different states and some from were from other countries. We might have under estimated the mortality or readmission rates if these patients were readmitted to a different hospital closer to their residency place after discharge.
- Another limitation is that the majority of our included patients were white; our results may not be generalizable to people from other races.

## Introduction:

Acute decompensated heart failure (ADHF), acute myocardial infarction (AMI), and pneumonia are among the most common causes of hospitalization in the United States, with more than 2.5 million hospitalizations per year, and estimated annual hospital cost of \$31.3 billion.<sup>1,2</sup> Hospitalized patients with ADHF, AMI, or pneumonia are at high risk of death and readmission at 30 days after index hospitalization.<sup>1,2</sup> In the United States, 15.1% of patients with acute myocardial infarction (AMI), 11.4% of patients with ADHF, and 11.3% patients with pneumonia die within 30 days after hospitalization for respective disorders.<sup>3,4</sup> Likewise, 24.8%, 19.9% and 18.3% of patients hospitalized for ADHF, AMI, and pneumonia respectively are readmitted within 30 days of the first hospitalization.<sup>5</sup> Risk standardized 30-day mortality and readmission rates are quality performance measures for AMI, ADHF, and pneumonia.<sup>6</sup> However, these outcomes vary between males and females.<sup>5</sup>

In the past several decades, gender disparities in clinical outcomes of hospitalized patients with different diseases have been investigated.<sup>7,8</sup> Several studies suggested gender differences in clinical outcomes for patients with AMI, ADHF and Pneumonia.<sup>9-12</sup> Females have worse outcomes for pneumonia than males, with adjusted risk ratio of 1.15 for 28 days mortality.<sup>13</sup> Women with acute coronary syndromes were at a higher risk for unadjusted in-hospital death (5.6% vs. 4.3%)<sup>8</sup> and they are more likely to have adverse outcomes (myocardial infarction, stroke and readmission) compared to men (odds ratio 1.24, 95% CI 1.14 to 1.34).<sup>14</sup>

1  
2  
3 Although no gender differences were found in outcomes in patients with ADHF, there  
4 were significant gender differences in the clinical characteristics at presentation including  
5 age and comorbidities.<sup>9</sup>  
6  
7

8  
9  
10 Multimorbidity, defined as existence of two or more disorders in an individual patient,  
11 has become a public health issue of increasing magnitude. Around one third of all  
12 Americans have multimorbidity (31.5%), and the rate is expected to increase with time.<sup>15</sup>  
13  
14 Multimorbidity is associated with premature death, propensity for over investigation,  
15 duplicate tests, medication non-adherence, polypharmacy with increased risk for drug  
16 adverse events, and a decline in functional status.<sup>15</sup> Multimorbidity itself may have  
17 gender disparities. The US National Health and Nutrition Examination Survey  
18 (NHANES) when looking at persons 65 years and older found that 83% of women  
19 compared to 65% men with coronary artery disease had one of the four comorbid  
20 conditions (arthritis, chronic lower respiratory tract disease, diabetes mellitus, and  
21 stroke).<sup>16</sup> European data suggest a similar difference in prevalence of multimorbidity  
22 between men and women.<sup>17</sup>  
23  
24

25  
26 Although the above data provide sex-related differences in the prevalence of  
27 multimorbidity in specific patient population, the disparity in rates of occurrence of  
28 comorbid conditions and their impact on early clinical outcome have not been reported  
29 by gender for broader hospitalized patients with ADHF, AMI, and pneumonia.  
30  
31

32  
33 To address this gap in knowledge, we evaluated gender-specific differences in prevalence  
34 of individual and multiple comorbid conditions in a large hospital-based patient  
35 population with ADHF, AMI, and pneumonia. Furthermore, we determined whether the  
36  
37  
38  
39  
40  
41  
42  
43  
44  
45  
46  
47  
48  
49  
50  
51  
52  
53  
54  
55  
56  
57  
58  
59  
60

1  
2  
3 presence of individual or multimorbidity impacts 30-day mortality or readmission by  
4  
5 gender independent of demographic and social characteristics.  
6  
7  
8  
9  
10  
11  
12  
13  
14  
15  
16  
17  
18  
19  
20  
21  
22  
23  
24  
25  
26  
27  
28  
29  
30  
31  
32  
33  
34  
35  
36  
37  
38  
39  
40  
41  
42  
43  
44  
45  
46  
47  
48  
49  
50  
51  
52  
53  
54  
55  
56  
57  
58  
59  
60



## Methods:

### Study design and Population sample:

This is a retrospective study of patients aged  $\geq 18$  years hospitalized for ADHF, AMI, and pneumonia at Mayo Clinic, Rochester, Minnesota, from January 1, 1995 to August 31, 2015.

We included first hospitalization in the analysis when a patient had multiple repeat hospitalizations for the same condition. The data were extracted by dedicated abstraction personnel using International Classification of Diseases, Ninth Revision, Clinical Modification (ICD-9-CM) codes (supplementary tables 1-3). We abstracted data-related to age, gender, race, zip code, insurance, principal discharge diagnosis, secondary diagnoses, length of hospital stay, death, and readmission by date. The diagnoses of AMI, ADHF, and pneumonia were based on physician provider as documented in clinical notes. Patients who refused participation in clinical research were excluded. The study was approved by the Mayo Clinic Institutional Review Board.

**Patient and Public Involvement:** patients and public were not involved.

### Measure of multi-comorbidities:

Comorbidities were chosen from twenty chronic conditions (Supplementary Table 4) specified by the Office of the Assistant Secretary for Health (OASH)<sup>18</sup> using ICD-9-CM codes (Supplementary table 5). Multi-comorbidities were categorized into four groups based on the number of existing chronic conditions: less than 2 comorbidities, 2 comorbidities, 3 comorbidities, and 4 or more comorbidities.

We did not use composite morbidity index such as Charlson, since it needed to be modified for this study. For example, we did not count coronary artery disease (CAD) as

1  
2  
3 one of the comorbidities for patients hospitalized for AMI, the same for congestive heart  
4 failure for patients with ADHF.  
5

6  
7 We excluded 4-comorbid conditions (autism, schizophrenia, hepatitis, and HIV) from the  
8 analysis because of very low frequency of occurrence (<1%)..  
9

### 10 11 12 13 **Measures of outcomes:**

14  
15 The primary outcomes were prevalence of comorbidities in men and women, 30 day  
16 mortality, defined as 30 days from the day of admission with one of the primary  
17 diagnosis, and 30 day readmission for any cause since discharge date.  
18  
19

### 20 21 22 23 **Statistical analysis:**

24  
25 Baseline characteristic data were summarized as mean and standard deviation for  
26 continuous variables and as for categorical variables. Prevalence of comorbidities and the  
27 number of multi-morbidities in men and women were compared using Chi<sup>2</sup> tests.  
28

29  
30 Gender differences in 30 day mortality and 30 day readmission were presented as odds  
31 ratio. Logistic regression models were developed to estimate the risk of outcomes of  
32 interest while controlling for various confounders (age, length of stay, Olmsted county  
33 residency, and number of comorbidities). Results are reported as odds ratios and 95%  
34 confidence intervals (CI). A two-tailed P value <0.05 was considered as statistically  
35 significant and all analyses were performed using STATA 14.0 (StataCorp, College  
36 Station, Texas).  
37  
38  
39  
40  
41  
42  
43  
44  
45  
46  
47  
48  
49  
50  
51  
52  
53  
54  
55  
56  
57  
58  
59  
60

## Results:

40,971 patients were included during the study period, 12,265 with ADHF, 15,777 with AMI, and 12,929 with pneumonia. There were more men in all three conditions, and men were older. (Table 1)

The prevalence of each comorbidity in men and women were reported in Table 1. The majority of deaths due to AMI occurred in the first 10 days; whereas this trend was not evidence for pneumonia or ADHF (Supplementary figures 1-3). The majority of readmissions for all three conditions occurred in the first 15 days (Supplementary figures 4-6).

### Summary of outcomes

#### ADHF:

12,265 patients were hospitalized with ADHF within the study period, 7,010 men and 5,255 women. Women were older with a mean age of 75.4 years compared to 72.3 years in men. 85.75% of both men and women were Caucasian. 71.94 % of men had multi-comorbidities compared to 69.99 % of women.

After adjusting for age, length of stay, residence place (Olmsted county vs. non-Olmsted), and multi-comorbidities, OR for 30 day mortality for men vs. women was 0.94 (95% CI: 0.82, 1.07), OR for 30 day readmission 0.90 (95% CI: 0.82, 0.99). (Table 2), (Figure 1)

#### AMI:

Of the 15,777 patients hospitalized with AMI 10,280 were men and 5,497 were women. Women were older, with a mean age of 73 years compared to 66.5 years in men. 86.78%

1  
2  
3 of patients were Caucasian (87% of men and 86% in women) (Table 2). 46.73 % of men  
4 had multi-comorbidities compared to 52.17 % of women.  
5

6  
7 After adjusting for age, length of stay, residence place (Olmsted county vs. non-  
8 Olmsted), and multi-comorbidities, OR for 30 day mortality for men vs. women was 0.98  
9  
10 (95% CI: 0.86, 1.11), OR for 30 day readmission 0.90 (95% CI: 0.79, 1.04). (Table 2)  
11  
12 (Figure 1)  
13  
14

### 15 16 17 18 **Pneumonia:**

19  
20 Of the 12,929 patients hospitalized with pneumonia within the study period, three were  
21  
22 7,073 men and 5,856 women. Women were older with a mean age of 70.8 compared to  
23  
24 69.2 years in men. 85% of both men and women were Caucasian. 58.89% of men had  
25  
26 multi-comorbidities compared to 55.79% of women.  
27

28  
29 After adjusting for age, length of stay, residence place (Olmsted county vs. non-  
30 Olmsted), and multi-comorbidities, OR for 30 day mortality for men vs. women was 1.19  
31  
32 (95% CI 1.06, 1.34), OR for 30 day readmission 1.10 (95% CI 0.99, 1.23). (Table 2)  
33  
34 (Figure 1)  
35  
36

### 37 38 39 **Sensitivity analysis:**

40  
41 To determine the contemporary status of gender disparities and comorbidities, we  
42  
43 conducted a sensitivity analysis focusing on patients who were admitted in the last 5  
44  
45 years. The results were overall consistent with the main analysis, except for 30 day  
46  
47 mortality for pneumonia (which became nonsignificant between men and women  
48  
49 whereas mortality was marginally higher in men, in the original analysis).  
50  
51 (Supplementary table 6).  
52  
53  
54  
55  
56  
57  
58  
59  
60

1  
2  
3 We conducted another sensitivity analysis, looking for 15 day mortality and readmission.  
4  
5 There were no statistically significant differences in 15 day readmission between men  
6  
7 and women in all 3 conditions. 15 day mortality was marginally higher for pneumonia in  
8  
9 men OR: 1.15 (95% CI: 1.00 to 1.33) but not statistically significant different in AMI or  
10  
11 ADHF (Supplementary table 7).  
12  
13

### 14 **Discussion:**

15  
16  
17 This study suggests that comorbidities are distributed differently between men and  
18  
19 women hospitalized for ADHF, AMI and pneumonia. Despite a fairly large sample size,  
20  
21 this study showed that gender differences appear to have minimal meaningful impact on  
22  
23 outcomes.  
24  
25

26  
27 In AMI, women are known to less commonly report chest pain or discomfort compared  
28  
29 with men, this may lead to gender differences in outcomes of AMI.<sup>19</sup> However, in our  
30  
31 study, the gender difference in 30-day mortality could be explained by the age difference,  
32  
33 women were 6.5 years older in average. After adjusting for residency location and  
34  
35 number of comorbidities, age had a significant impact on 30 day mortality, but not gender  
36  
37 or multi-comorbidities. On the other hand, the only factor that had a significant  
38  
39 association with 30 day readmission was multi-comorbidities.  
40  
41

42  
43 In ADHF, men had significantly lower 30 day readmission rate compared to women,  
44  
45 while they did not have a significant difference in 30 day mortality. A sensitivity analysis  
46  
47 including only patients for the last 5 years, showed similar results. Multi-comorbidity did  
48  
49 not have a significant effect on 30 day mortality or readmission. This might be explained  
50  
51 by difference in symptoms presentations, or difference in access to medical care between  
52  
53  
54  
55  
56  
57  
58  
59  
60

1  
2  
3 men and women. For example, men used to have higher invasive cardiac procedures than  
4 women in a previously published study.<sup>20</sup>

5  
6  
7 Men with pneumonia had significantly lower 30 day mortality compared to women, but  
8 no significant difference in 30 day readmission. Multi- comorbidities had a significant  
9 effect on 30 day readmission in men but not in women.

### 14 **Comparison with existing literature**

15  
16 Our findings in AMI were consistent with previously published studies<sup>11,21</sup> that showed a  
17 higher 30 day mortality rate in women verses men, but no significant difference after  
18 adjustment for other variables. In these studies, they include elderly patients only (> 65  
19 years old) while we had no age restriction, but yet, in all of these studies, women were  
20 older, and had differences in comorbidities compared to men. In ADHF, our results were  
21 consistent with a previously published study that used ADHERE (Acute Decompensated  
22 Heart Failure National Registry) between 2001 and 2004<sup>9</sup>, in both studies there was no  
23 significant difference in in-hospital mortality between men and women.

24  
25 In pneumonia, our study showed that men have worse outcomes than women, unlike a  
26 previous study<sup>13</sup> that found that women have worse outcomes for community-acquired  
27 pneumonia with 28-day mortality odds ratio of 1.15 (95% CI 1.02–1.30). However, our  
28 study included all types of pneumonia, and it was consistent with another study that used  
29 the Medicare database and showed worse outcomes in men<sup>22</sup>.

### 34 **Limitations and strengths**

35  
36 A limitation of this study is that we used ICD-9 codes for identifying patients. It was not  
37 feasible to review charts for such a large number of patients; and therefore, we had to  
38 depend on administrative and billing codes. New research using the recent ICD-10  
39  
40  
41  
42  
43  
44  
45  
46

1  
2  
3 coding is needed to study the consistency of prevalence and implication of comorbidities  
4  
5 on early outcomes in hospitalized patients. Another limitation is that we included all  
6  
7 patients that were hospitalized in a single regional tertiary center; these patients were  
8  
9 from several different states and some from were from other countries. We might have  
10  
11 under estimated the mortality or readmission rates if these patients were readmitted to a  
12  
13 different hospital closer to their residency place after discharge. Making this less  
14  
15 concerning is the fact that we found, gender to be an independent variable from residency  
16  
17 place; in addition, we adjusted for residency place (Olmsted County where the hospital is  
18  
19 vs. non Olmsted County). Another limitation is that the majority of our included patients  
20  
21 were white; our results may not be generalizable to people from other races. The  
22  
23 strengths of this study include the large sample size, multivariable adjustment and  
24  
25 sensitivity analyses to assess robustness of findings.  
26  
27  
28  
29  
30

### 31 **Clinical and policy implication:**

32  
33 Although this study showed that women hospitalized for ADHF had higher 30 day  
34  
35 readmission rate, the absolute risk was small with a number needed to harm of 88 patients  
36  
37 (95% CI: 48, 445). For pneumonia, women had lower mortality, with a number needed to  
38  
39 harm of 61 patients (95% CI: 36, 202). With this minimal clinically meaningful impact of  
40  
41 these differences on the early outcomes of these three important conditions; efforts to  
42  
43 address gender difference may need to be diverted towards targeting overall population  
44  
45 health, where outcomes of these conditions are still suboptimal in both genders, or  
46  
47 towards reducing race/ethnicity disparity, or improving access to care differences.  
48  
49  
50  
51  
52  
53  
54  
55  
56  
57  
58  
59  
60

## Conclusion:

Gender disparities interact with comorbidities and impact mortality and readmission.

However, this effect varies according to the conditions, seems to be unpredictable and has a minimal meaningful impact on outcomes.

## Funding:

This publication was made possible by CTSA Grant Number UL1 TR000135 from the National Center for Advancing Translational Sciences (NCATS), a component of the National Institutes of Health (NIH). Its contents are solely the responsibility of the authors and do not necessarily represent the official view of NIH.

**Contributors:** MA conception and design of the study, data collection, data analysis, interpreted results, drafted and revised manuscript; ZW data analysis, manuscript revision and approval of final draft; MHM contributed to study design, manuscript development, approval of final draft; MY: developed the idea for the study, interpreted results, revised manuscript, approval of final draft.

**Competing interests:** None declared

**Ethics approval:** Mayo Clinic Institutional Review Committee (IRB).

**Provenance and peer review:** Not commissioned; externally peer reviewed.

**Data sharing statement:** No additional data are available.

## References:

1. Jennifer Schwartz P, MPH, Kelly M. Strait M, Amena Keshawarz M, et al. *CMS Medicare Hospital Quality Chartbook, Performance Report on Outcome Measures*. SEPTEMBER 2014.
2. Pfunter A, Wier LM, Steiner C. Costs for Hospital Stays in the United States, 2010: Statistical Brief #146. *Healthcare Cost and Utilization Project (HCUP) Statistical Briefs*. Rockville (MD)2006.
3. Suter L, Li S-X, Grady J, et al. National Patterns of Risk-Standardized Mortality and Readmission After Hospitalization for Acute Myocardial Infarction, Heart Failure, and



- 1  
2  
3 Pneumonia: Update on Publicly Reported Outcomes Measures Based on the 2013  
4 Release. *J GEN INTERN MED*. 2014;29(10):1333-1340.
- 5  
6 4. Lindenauer PK, Bernheim SM, Grady JN, et al. The performance of US hospitals as  
7 reflected in risk-standardized 30-day mortality and readmission rates for medicare  
8 beneficiaries with pneumonia. *J Hosp Med*. 2010;5(6):822.
- 9  
10 5. Dharmarajan K, Hsieh AF, Lin Z, et al. Diagnoses and timing of 30-day readmissions after  
11 hospitalization for heart failure, acute myocardial infarction, or pneumonia. *JAMA*.  
12 2013;309(4):355-363.
- 13  
14 6. [https://www.cms.gov/medicare/quality-initiatives-patient-assessment-](https://www.cms.gov/medicare/quality-initiatives-patient-assessment-instruments/hospitalqualityinits/outcomemeasures.html)  
15 [instruments/hospitalqualityinits/outcomemeasures.html](https://www.cms.gov/medicare/quality-initiatives-patient-assessment-instruments/hospitalqualityinits/outcomemeasures.html).
- 16  
17 7. Crabtree TD, Pelletier SJ, Gleason TG, Pruett TL, Sawyer RG. Gender-dependent  
18 differences in outcome after the treatment of infection in hospitalized patients. *JAMA*.  
19 1999;282(22):2143-2148.
- 20  
21 8. Blomkalns AL, Chen AY, Hochman JS, et al. Gender disparities in the diagnosis and  
22 treatment of non-ST-segment elevation acute coronary syndromes—Large-scale  
23 observations from the CRUSADE (Can Rapid Risk Stratification of Unstable Angina  
24 Patients Suppress Adverse Outcomes With Early Implementation of the American  
25 College of Cardiology/American Heart Association Guidelines) National Quality  
26 Improvement Initiative. *J Am Coll Cardiol*. 2005;45(6):832-837.
- 27  
28 9. Galvao M, Kalman J, DeMarco T, et al. Gender differences in in-hospital management  
29 and outcomes in patients with decompensated heart failure: analysis from the Acute  
30 Decompensated Heart Failure National Registry (ADHERE). *J Card Fail*. 2006;12(2):100-  
31 107.
- 32  
33 10. Thomsen RW, Riis A, Norgaard M, et al. Rising incidence and persistently high mortality  
34 of hospitalized pneumonia: a 10-year population-based study in Denmark. *J Intern Med*.  
35 2006;259(4):410-417.
- 36  
37 11. Berger JS, Elliott L, Gallup D, et al. Sex differences in mortality following acute coronary  
38 syndromes. *JAMA*. 2009;302(8):874-882.
- 39  
40 12. Vaccarino V, Parsons L, Every NR, Barron HV, Krumholz HM. Sex-Based Differences in  
41 Early Mortality after Myocardial Infarction. *New England Journal of Medicine*.  
42 1999;341(4):217-225.
- 43  
44 13. Arnold FW, Wiemken TL, Peyrani P, Mirsaeidi M, Ramirez JA. Outcomes in females  
45 hospitalised with community-acquired pneumonia are worse than in males. *Eur Respir J*.  
46 2013;41(5):1135-1140.
- 47  
48 14. Dey S, Flather MD, Devlin G, et al. Sex-related differences in the presentation, treatment  
49 and outcomes among patients with acute coronary syndromes: the Global Registry of  
50 Acute Coronary Events. *Heart*. 2009;95(1):20-26.
- 51  
52 15. Boyd CM, Fortin M. Future of multimorbidity research: how should understanding of  
53 multimorbidity inform health system design. *Public Health Rev*. 2010;32(2):451-474.
- 54  
55 16. Weiss CO, Boyd CM, Yu Q, Wolff JL, Leff B. Patterns of prevalent major chronic disease  
56 among older adults in the United States. *JAMA*. 2007;298(10):1160-1162.
- 57  
58 17. Abad-Diez JM, Calderon-Larranaga A, Poncel-Falco A, et al. Age and gender differences  
59 in the prevalence and patterns of multimorbidity in the older population. *BMC Geriatr*.  
60 2014;14:75.
18. Goodman RA, Posner SF, Huang ES, Parekh AK, Koh HK. Defining and measuring chronic  
conditions: imperatives for research, policy, program, and practice. *Prev Chronic Dis*.  
2013;10:E66.

- 1
  - 2
  - 3
  - 4
  - 5
  - 6
  - 7
  - 8
  - 9
  - 10
  - 11
  - 12
  - 13
  - 14
  - 15
  - 16
  - 17
  - 18
  - 19
  - 20
  - 21
  - 22
  - 23
  - 24
  - 25
  - 26
  - 27
  - 28
  - 29
  - 30
  - 31
  - 32
  - 33
  - 34
  - 35
  - 36
  - 37
  - 38
  - 39
  - 40
  - 41
  - 42
  - 43
  - 44
  - 45
  - 46
  - 47
  - 48
  - 49
  - 50
  - 51
  - 52
  - 53
  - 54
  - 55
  - 56
  - 57
  - 58
  - 59
  - 60
19. Canto JG, Goldberg RJ, Hand MM, et al. Symptom presentation of women with acute coronary syndromes: myth vs reality. *Arch Intern Med.* 2007;167(22):2405-2413.
20. Giles WH, Anda RF, Casper ML, Escobedo LG, Taylor HA. Race and sex differences in rates of invasive cardiac procedures in US hospitals. Data from the National Hospital Discharge Survey. *Arch Intern Med.* 1995;155(3):318-324.
21. Canto JG, Rogers WJ, Goldberg RJ, et al. Association of age and sex with myocardial infarction symptom presentation and in-hospital mortality. *JAMA.* 2012;307(8):813-822.
22. Kaplan V, Angus DC, Griffin MF, Clermont G, Scott Watson R, Linde-Zwirble WT. Hospitalized community-acquired pneumonia in the elderly: age- and sex-related patterns of care and outcome in the United States. *Am J Respir Crit Care Med.* 2002;165(6):766-772.

1  
2  
3  
4  
5  
6  
7  
8  
9  
10  
11  
12  
13  
14  
15  
16  
17  
18  
19  
20  
21  
22  
23  
24  
25  
26  
27  
28  
29  
30  
31  
32  
33  
34  
35  
36  
37  
38  
39  
40  
41  
42  
43  
44  
45  
46  
47  
48  
49  
50  
51  
52  
53  
54  
55  
56  
57  
58  
59  
60

**Legends:**

**Table 1: Baseline characteristics**

**Table 2: Adjusted outcomes**

**Figure 1: Adjusted outcomes 30 day mortality and 30 day readmission in med vs. women.**

For peer review only

**Table 1: Baseline characteristics**

|                       | AMI = 15,777   |                |         | ADHF =12,265    |                |            | Pneumonia = 12,929 |                |            |
|-----------------------|----------------|----------------|---------|-----------------|----------------|------------|--------------------|----------------|------------|
|                       | Men<br>65%     | Women<br>35%   | P value | Men<br>57%      | Women<br>43%   | P<br>value | Men<br>55%         | Women<br>45%   | P<br>value |
| <b>Age (SD)</b>       | 66.5<br>(13.3) | 73 (13.3)      | <0.001  | 72.3<br>(13)    | 75.4<br>(13.9) | <0.001     | 69.2<br>(16.8)     | 70.8<br>(17.7) | <0.001     |
| <b>Race %</b>         |                |                |         |                 |                |            |                    |                |            |
| <b>Non-white</b>      | 12.74%         | 14.12%         | 0.015   | 14.25%          | 14.25%         | 0.997      | 15.65%             | 14.70%         | 0.14       |
| <b>White</b>          | 87.26%         | 85.88%         |         | 85.75%          | 85.75%         |            | 84.35%             | 85.30%         |            |
| <b>Comorbidity</b>    |                |                |         |                 |                |            |                    |                |            |
| <b>Arthritis</b>      | 3.37%          | 5.57%          | 0.06    | 4.35%           | 6.95%          | <0.001     | 4.28%              | 7.26%          | <0.001     |
| <b>Asthma</b>         | 2.42%          | 3.89%          | <0.001  | 2.81%           | 5.25%          | <0.001     | 5.09%              | 10.31%         | <0.001     |
| <b>Dementia</b>       | 1.73%          | 3.29%          | <0.001  | 2.65%           | 4.17%          | <0.001     | 6.9%               | 8.52%          | 0.001      |
| <b>Depression</b>     | 4.4%           | 6.8%           | <0.001  | 6.28%           | 9.12%          | <0.001     | 8.64%              | 12.93%         | <0.001     |
| <b>Hypertension</b>   | 57.64%         | 65.69%         | <0.001  | 56.52%          | 62.11%         | <0.001     | 43.91%             | 48.80%         | <0.001     |
| <b>Osteoporosis</b>   | 0.4%           | 4.73%          | <0.001  | 0.97%           | 7.16%          | <0.001     | 2.09%              | 9.00%          | <0.001     |
| <b>Cancer</b>         | 8.14%          | 6.95%          | 0.01    | 13.42%          | 11.91%         | 0.01       | 25.93%             | 17.81%         | <0.001     |
| <b>Drug abuse</b>     | 4.15%          | 1.47%          | <0.001  | 3.65%           | 0.97%          | <0.001     | 4.54%              | 2.36%          | <0.001     |
| <b>Dyslipidemia</b>   | 44.46%         | 40.40%         | <0.001  | 1.06%           | 27.73%         | <0.001     | 20.54%             | 17.71%         | <0.001     |
| <b>CAD</b>            |                |                |         | 56.98%          | 41.27%         | <0.001     | 27.29%             | 17.78%         | <0.001     |
| <b>CHF</b>            | 21.15%         | 29.03%         | <0.001  |                 |                |            | 20.44%             | 21.36%         | 0.20       |
| <b>CKD</b>            | 9.49%          | 9.24%          | 0.60    | 27.93%          | 21.62%         | <0.001     | 15.28%             | 10.71%         | <0.001     |
| <b>COPD</b>           | 11.02%         | 10.84%         | 0.73    | 23.50%          | 16.67%         | <0.001     | 28.19%             | 22.8%          | <0.001     |
| <b>Diabetes</b>       | 26.18%         | 29.62%         | <0.001  | 33.75%          | 32.31%         | 0.09       | 22.78%             | 19.31%         | <0.001     |
| <b>Arrhythmia</b>     | 25.62%         | 27.03%         | 0.06    | 60.93%          | 54.23%         | <0.001     | 28.36%             | 24.80%         | <0.001     |
| <b>Stroke</b>         | 3.35%          | 4.49%          | <0.001  | 2.84%           | 2.42%          | 0.15       | 2.52%              | 1.67%          | 0.001      |
| <b>Length of stay</b> |                |                |         |                 |                |            |                    |                |            |
| <b>Mean (SD)</b>      | 5.42<br>(5.83) | 5.67<br>(5.76) | 0.01    | 6.02<br>(10.22) | 5.71<br>(8.33) | 0.07       | 5.36<br>(6.01)     | 5.13<br>(6.41) | 0.04       |

AA: African American, ADHF: acute decompensated heart failure, AMI: acute myocardial infarction, CAD: Coronary artery disease, CHF: Congestive heart failure, CKD: chronic kidney disease, COPD: Chronic Obstructive Pulmonary Disease, NA: Native American, SD: standard deviation.

**Table 2: Adjusted outcomes**

| Men vs. Women      | AMI                   |         | ADHF                  |         | Pneumonia             |         |
|--------------------|-----------------------|---------|-----------------------|---------|-----------------------|---------|
|                    | Effect size (95% CI)  | P value | OR (95% CI)           | P value | OR (95% CI)           | P value |
| 30 day mortality   | OR: 0.98 (0.86, 1.11) | 0.71    | OR: 0.94 (0.82, 1.07) | 0.39    | OR: 1.19 (1.06, 1.34) | 0.004   |
| 30 day readmission | OR: 0.90 (0.79, 1.04) | 0.16    | OR: 0.90 (0.82, 0.99) | 0.03    | OR: 1.10 (0.99, 1.23) | 0.08    |

ADHF: acute decompensated heart failure, AMI: acute myocardial infarction, LOS: length of stay, OR: odds ratio.

For peer review only

1  
2  
3  
4  
5  
6  
7  
8  
9  
10  
11  
12  
13  
14  
15  
16  
17  
18  
19  
20  
21  
22  
23  
24  
25  
26  
27  
28  
29  
30  
31  
32  
33  
34  
35  
36  
37  
38  
39  
40  
41  
42  
43  
44  
45  
46  
47  
48  
49  
50  
51  
52  
53  
54  
55  
56  
57  
58  
59  
60

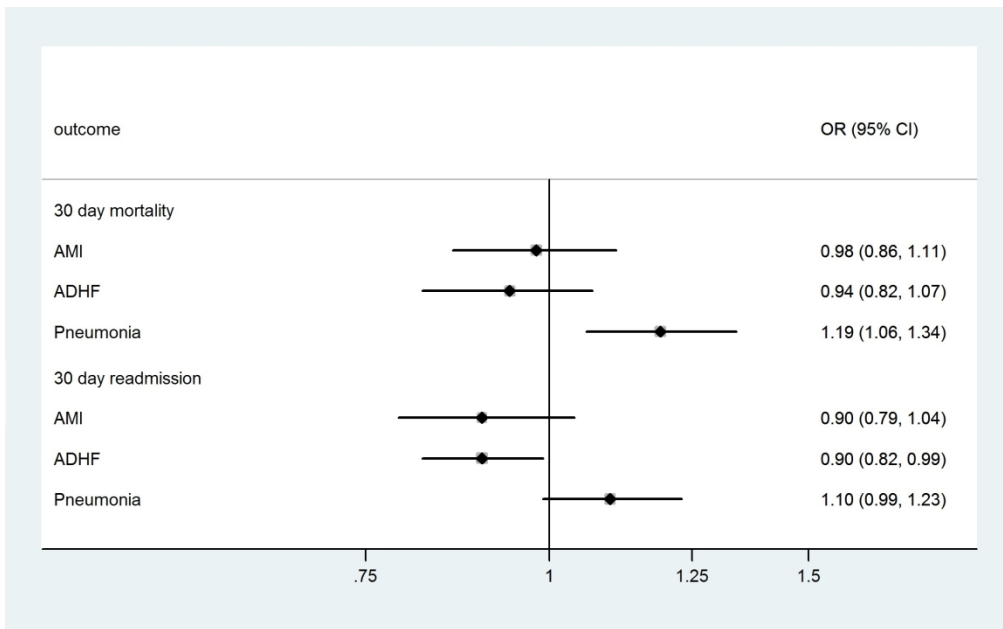

Adjusted outcomes 30 day mortality and 30 day readmission in med vs. women

633x396mm (96 x 96 DPI)

**Supplementary Table 1: ICD9 codes used in ADHF:**

| <b>ICD-9</b> | <b>Frequency</b> | <b>%</b>   |
|--------------|------------------|------------|
| 428          | 8,665            | 70.65      |
| 428.1        | 97               | 0.79       |
| 428.2        | 7                | 0.06       |
| 428.21       | 305              | 2.49       |
| 428.22       | 99               | 0.81       |
| 428.23       | 1,021            | 8.32       |
| 428.3        | 24               | 0.2        |
| 428.31       | 243              | 1.98       |
| 428.32       | 80               | 0.65       |
| 428.33       | 787              | 6.42       |
| 428.4        | 6                | 0.05       |
| 428.41       | 109              | 0.89       |
| 428.42       | 50               | 0.41       |
| 428.43       | 742              | 6.05       |
| 428.9        | 30               | 0.24       |
| <b>Total</b> | <b>12,265</b>    | <b>100</b> |

**Supplementary Table 2: ICD9 codes used in AMI.**

| ICD-9  | Frequency | %     |
|--------|-----------|-------|
| 410    | 3         | 0.02  |
| 410.01 | 536       | 3.4   |
| 410.02 | 2         | 0.01  |
| 410.1  | 34        | 0.22  |
| 410.11 | 2,186     | 13.86 |
| 410.12 | 11        | 0.07  |
| 410.2  | 5         | 0.03  |
| 410.21 | 466       | 2.95  |
| 410.22 | 3         | 0.02  |
| 410.3  | 4         | 0.03  |
| 410.31 | 309       | 1.96  |
| 410.32 | 2         | 0.01  |
| 410.4  | 9         | 0.06  |
| 410.41 | 2,688     | 17.04 |
| 410.42 | 17        | 0.11  |
| 410.5  | 4         | 0.03  |
| 410.51 | 256       | 1.62  |
| 410.52 | 2         | 0.01  |
| 410.6  | 1         | 0.01  |
| 410.61 | 75        | 0.48  |
| 410.7  | 25        | 0.16  |
| 410.71 | 8,345     | 52.89 |
| 410.72 | 58        | 0.37  |
| 410.8  | 6         | 0.04  |
| 410.81 | 331       | 2.1   |
| 410.82 | 2         | 0.01  |
| 410.9  | 7         | 0.04  |
| 410.91 | 389       | 2.47  |
| 410.92 | 1         | 0.01  |
| Total  | 15,777    | 100   |



**Supplementary Table 3: ICD9 codes used in pneumonia:**

| ICD-9  | Frequency | %    |
|--------|-----------|------|
| 11.6   | 1         | 0.01 |
| 11.64  | 1         | 0.01 |
| 52.1   | 10        | 0.08 |
| 73     | 2         | 0.02 |
| 115.05 | 68        | 0.53 |
| 115.95 | 29        | 0.22 |
| 480    | 1         | 0.01 |
| 480.1  | 67        | 0.52 |
| 480.2  | 1         | 0.01 |
| 480.3  | 1         | 0.01 |
| 480.8  | 12        | 0.09 |
| 480.9  | 57        | 0.44 |
| 481    | 431       | 3.33 |
| 482    | 68        | 0.53 |
| 482.1  | 208       | 1.61 |
| 482.2  | 163       | 1.26 |
| 482.3  | 57        | 0.44 |
| 482.31 | 11        | 0.09 |
| 482.32 | 6         | 0.05 |
| 482.39 | 15        | 0.12 |
| 482.4  | 66        | 0.51 |
| 482.41 | 140       | 1.08 |
| 482.42 | 57        | 0.44 |
| 482.49 | 2         | 0.02 |
| 482.81 | 8         | 0.06 |
| 482.82 | 33        | 0.26 |
| 482.83 | 118       | 0.91 |
| 482.84 | 46        | 0.36 |
| 482.89 | 42        | 0.32 |
| 482.9  | 143       | 1.11 |
| 483    | 25        | 0.19 |
| 483.8  | 5         | 0.04 |
| 484.1  | 3         | 0.02 |
| 484.6  | 1         | 0.01 |
| 485    | 104       | 0.8  |
| 486    | 8,520     | 65.9 |
| 487    | 234       | 1.81 |
| 495.8  | 4         | 0.03 |
| 495.9  | 62        | 0.48 |
| 506    | 12        | 0.09 |
| 507    | 2,081     | 16.1 |
| 507.1  | 6         | 0.05 |
| 507.8  | 2         | 0.02 |
| 997.32 | 6         | 0.05 |
| Total  | 12,929    | 100  |

**Supplementary Table 4: Comorbidities specified by OASH.**

|              |                          |            |               |
|--------------|--------------------------|------------|---------------|
| Dyslipidemia | Coronary Artery Disease  | Depression | COPD          |
| Arthritis    | Substance abuse          | Diabetes   | Dementia      |
| Osteoporosis | Congestive Heart Failure | Cancer     | Schizophrenia |
| Autism       | Chronic Kidney Disease   | Arrhythmia | Hepatitis     |
| Hypertension | Stroke                   | Asthma     | HIV           |

**Supplementary Table 5: List of ICD-9 codes used for the comorbidities:**

| <b>The condition</b>    | <b>ICD-9 codes used:</b>                                                                                                                                                                                                                                                                                                                                                                                                                                                                                                                                                                                                                                                                                                       |
|-------------------------|--------------------------------------------------------------------------------------------------------------------------------------------------------------------------------------------------------------------------------------------------------------------------------------------------------------------------------------------------------------------------------------------------------------------------------------------------------------------------------------------------------------------------------------------------------------------------------------------------------------------------------------------------------------------------------------------------------------------------------|
| Dyslipidemia            | 272.0, 272.1, 272.2, 272.3, 272.4                                                                                                                                                                                                                                                                                                                                                                                                                                                                                                                                                                                                                                                                                              |
| Arthritis               | 714.0, 714.1, 714.2, 714.30, 714.31, 714.32, 714.33, 715.00, 715.04, 715.09, 715.10, 715.11, 715.12, 715.13, 715.14, 715.15, 715.16, 715.17, 715.18, 715.20, 715.21, 715.22, 715.23, 715.24, 715.25, 715.26, 715.27, 715.28, 715.30, 715.31, 715.32, 715.33, 715.34, 715.35, 715.36, 715.37, 715.38, 715.80, 715.89, 715.90, 715.91, 715.92, 715.93, 715.94, 715.95, 715.96, 715.97, 715.98, 720.0, 721.0, 721.1, 721.2, 721.3, 721.90, 721.91                                                                                                                                                                                                                                                                                 |
| Osteoporosis            | 733.00, 733.01, 733.02, 733.03, 733.09                                                                                                                                                                                                                                                                                                                                                                                                                                                                                                                                                                                                                                                                                         |
| Hypertension            | 401.0, 401.1, 401.9, 402.00, 402.01, 402.10, 402.11, 402.90, 402.91, 403.00, 403.01, 403.10, 403.11, 403.90, 403.91, 404.00, 404.01, 404.02, 404.03, 404.10, 404.11, 404.12, 404.13, 404.90, 404.91, 404.92, 404.93, 405.01, 405.09, 405.11, 405.19, 405.91, 405.99, 362.11, 437.2                                                                                                                                                                                                                                                                                                                                                                                                                                             |
| Coronary Artery Disease | 410.00, 410.01, 410.02, 410.10, 410.11, 410.12, 410.20, 410.21, 410.22, 410.30, 410.31, 410.32, 410.40, 410.41, 410.42, 410.50, 410.51, 410.52, 410.60, 410.61, 410.62, 410.70, 410.71, 410.72, 410.80, 410.81, 410.82, 410.90, 410.91, 410.92, 411.0, 411.1, 411.81, 411.89, 412, 413.0, 413.1, 413.9, 414.00, 414.01, 414.02, 414.03, 414.04, 414.05, 414.06, 414.07, 414.12, 414.2, 414.3, 414.8, 414.9                                                                                                                                                                                                                                                                                                                     |
| COPD                    | 490, 491.0, 491.1, 491.20, 491.21, 491.22, 491.8, 491.9, 492.0, 492.8, 494.0, 494.1, 496                                                                                                                                                                                                                                                                                                                                                                                                                                                                                                                                                                                                                                       |
| Chronic Kidney Disease  | 016.00, 016.01, 016.02, 016.03, 016.04, 016.05, 016.06, 095.4, 189.0, 189.9, 223.0, 236.91, 249.40, 249.41, 250.40, 250.41, 250.42, 250.43, 271.4, 274.10, 283.11, 403.01, 403.11, 403.91, 404.02, 404.03, 404.12, 404.13, 404.92, 404.93, 440.1, 442.1, 572.4, 580.0, 580.4, 580.81, 580.89, 580.9, 581.0, 581.1, 581.2, 581.3, 581.81, 581.89, 581.9, 582.0, 582.1, 582.2, 582.4, 582.81, 582.89, 582.9, 583.0, 583.1, 583.2, 583.4, 583.6, 583.7, 583.81, 583.89, 583.9, 584.5, 584.6, 584.7, 584.8, 584.9, 585, 585.1, 585.2, 585.3, 585.4, 585.5, 585.6, 585.9, 586, 587, 588.0, 588.1, 588.81, 588.89, 588.9, 591, 753.12, 753.13, 753.14, 753.15, 753.16, 753.17, 753.19, 753.20, 753.21, 753.22, 753.23, 753.29, 794.4 |
| Stroke                  | 430, 431, 433.01, 433.11, 433.21, 433.31, 433.81, 433.91, 434.00, 434.01, 434.10, 434.11, 434.90, 434.91, 435.0, 435.1, 435.3, 435.8, 435.9, 436, 997.02                                                                                                                                                                                                                                                                                                                                                                                                                                                                                                                                                                       |
| Depression              | 296.20, 296.21, 296.22, 296.23, 296.24, 296.25, 296.26, 296.30, 296.31, 296.32, 296.33, 296.34, 296.35, 296.36, 296.51, 296.52, 296.53, 296.54, 296.55, 296.56, 296.60, 296.61, 296.62, 296.63, 296.64, 296.65, 296.66, 296.89, 298.0, 300.4, 309.1, 311                                                                                                                                                                                                                                                                                                                                                                                                                                                                       |
| Diabetes                | 249.00, 249.01, 249.10, 249.11, 249.20, 249.21, 249.30, 249.31, 249.40, 249.41, 249.50, 249.51, 249.60, 249.61, 249.70, 249.71, 249.80, 249.81, 249.90, 249.91, 250.00, 250.01, 250.02, 250.03,                                                                                                                                                                                                                                                                                                                                                                                                                                                                                                                                |

|                          |                                                                                                                                                                                                                                                                                                                                                                   |
|--------------------------|-------------------------------------------------------------------------------------------------------------------------------------------------------------------------------------------------------------------------------------------------------------------------------------------------------------------------------------------------------------------|
|                          | 250.10, 250.11, 250.12, 250.13, 250.20, 250.21, 250.22, 250.23, 250.30, 250.31, 250.32, 250.33, 250.40, 250.41, 250.42, 250.43, 250.50, 250.51, 250.52, 250.53, 250.60, 250.61, 250.62, 250.63, 250.70, 250.71, 250.72, 250.73, 250.80, 250.81, 250.82, 250.83, 250.90, 250.91, 250.92, 250.93, 357.2, 362.01, 362.02, 366.41                                     |
| Cancer                   | Female breast cancer: 174.0, 174.1, 174.2, 174.3, 174.4, 174.5, 174.6, 174.8, 174.9, 175.0, 175.9, 233.0, V10.3.<br>Colorectal cancer: 154.0, 154.1, 153.0, 153.1, 153.2, 153.3, 153.4, 153.5, 153.6, 153.7, 153.8, 153.9, 230.3, 230.4, V10.05.<br>Prostate cancer: 185, 233.4, V10.46.<br>Lung cancer: 162.2, 162.3, 162.4, 162.5, 162.8, 162.9, 231.2, V10.11. |
| Arrhythmia               | 427.31                                                                                                                                                                                                                                                                                                                                                            |
| Asthma                   | 493.00, 493.01, 493.02, 493.10, 493.11, 493.12, 493.20, 493.21, 493.22, 493.81, 493.82, 493.90, 493.91, 493.92                                                                                                                                                                                                                                                    |
| Congestive Heart Failure | 398.91, 402.01, 402.11, 402.91, 404.01, 404.11, 404.91, 404.03, 404.13, 404.93, 428.0, 428.1, 428.20, 428.21, 428.22, 428.23, 428.30, 428.31, 428.32, 428.33, 428.40, 428.41, 428.42, 428.43, 428.9                                                                                                                                                               |
| Dementia                 | 331.0, 331.1, 331.11, 331.19, 331.2, 331.7, 290.0, 290.10, 290.11, 290.12, 290.13, 290.20, 290.21, 290.3, 290.40, 290.41, 290.42, 290.43, 294.0, 294.10, 294.11, 294.8, 797                                                                                                                                                                                       |

**Supplementary Table 6: sensitivity analysis for the last 5 years of the study**

| <b>Last 5 years</b>       | <b>AMI</b>          | <b>ADHF</b>         | <b>Pneumonia</b>    |
|---------------------------|---------------------|---------------------|---------------------|
| <b>Men vs. Women</b>      | <b>OR (95% CI)</b>  | <b>OR (95% CI)</b>  | <b>OR (95% CI)</b>  |
| <b>30 day mortality</b>   | 1.02 (0.73 to 1.43) | 0.81 (0.62 to 1.06) | 1.12 (0.85 to 1.47) |
| <b>30 day readmission</b> | 0.85 (0.63 to 1.15) | 0.78 (0.63 to 0.97) | 0.94 (0.74 to 1.20) |

For peer review only

**Supplementary Table 7: sensitivity analysis for 15 day mortality and readmission**

| <b>Last 5 years</b>       | <b>AMI</b>          | <b>ADHF</b>         | <b>Pneumonia</b>    |
|---------------------------|---------------------|---------------------|---------------------|
| <b>Men vs. Women</b>      | <b>OR (95% CI)</b>  | <b>OR (95% CI)</b>  | <b>OR (95% CI)</b>  |
| <b>15 day mortality</b>   | 1.00 (0.88 to 1.15) | 0.88 (0.73 to 1.05) | 1.15 (1.00 to 1.33) |
| <b>15 day readmission</b> | 0.91 (0.81 to 1.03) | 0.93 (0.81 to 1.06) | 1.10 (0.96 to 1.27) |

For peer review only

1  
2  
3  
4  
5  
6  
7  
8  
9  
10  
11  
12  
13  
14  
15  
16  
17  
18  
19  
20  
21  
22  
23  
24  
25  
26  
27  
28  
29  
30  
31  
32  
33  
34  
35  
36  
37  
38  
39  
40  
41  
42  
43  
44  
45  
46  
47  
48  
49  
50  
51  
52  
53  
54  
55  
56  
57  
58  
59  
60

Supplementary Figure 1: 30 day mortality in AMI

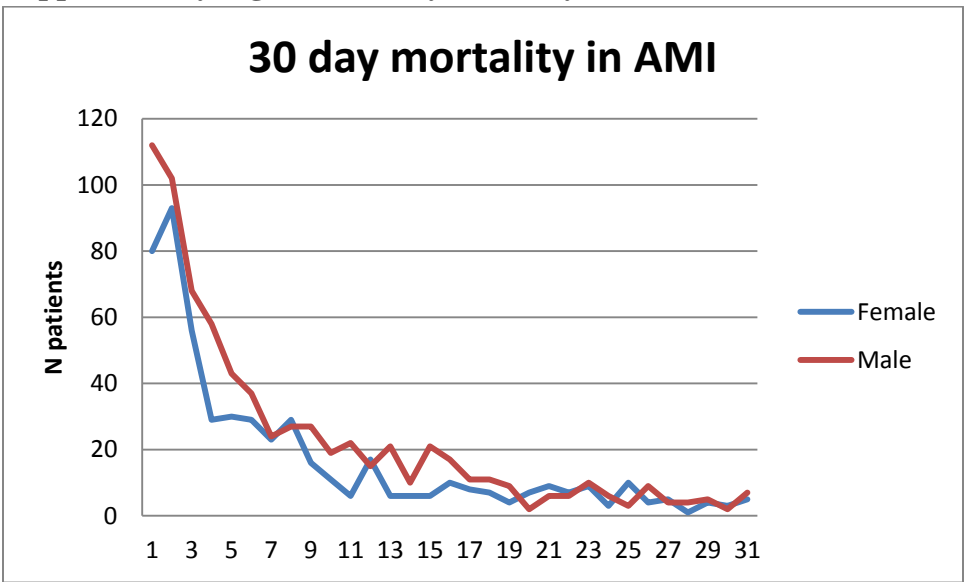

Peer review only

Supplementary Figure 2: 30 day mortality in ADHF

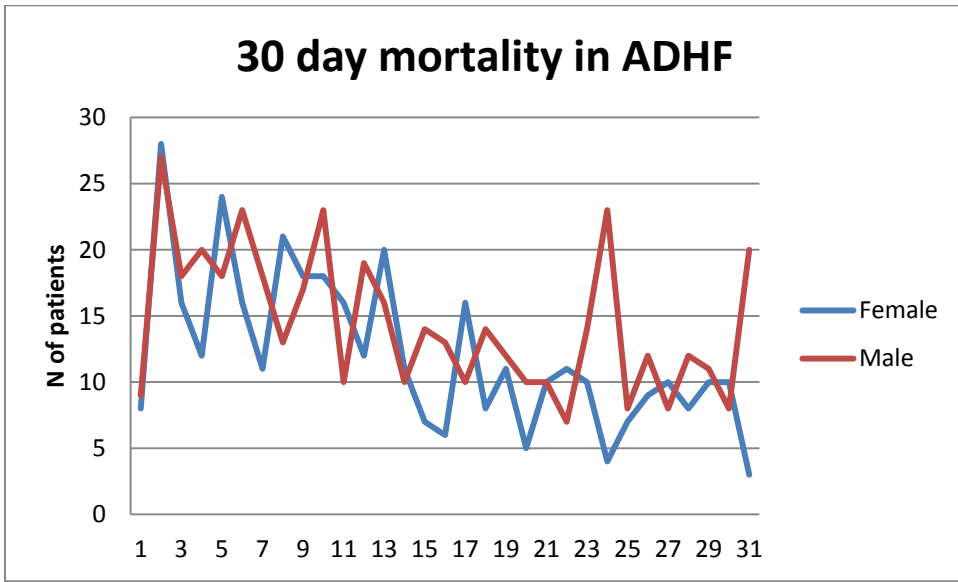

Peer review only



1  
2  
3  
4  
5  
6  
7  
8  
9  
10  
11  
12  
13  
14  
15  
16  
17  
18  
19  
20  
21  
22  
23  
24  
25  
26  
27  
28  
29  
30  
31  
32  
33  
34  
35  
36  
37  
38  
39  
40  
41  
42  
43  
44  
45  
46  
47  
48  
49  
50  
51  
52  
53  
54  
55  
56  
57  
58  
59  
60

Supplementary Figure 3: 30 day mortality in pneumonia

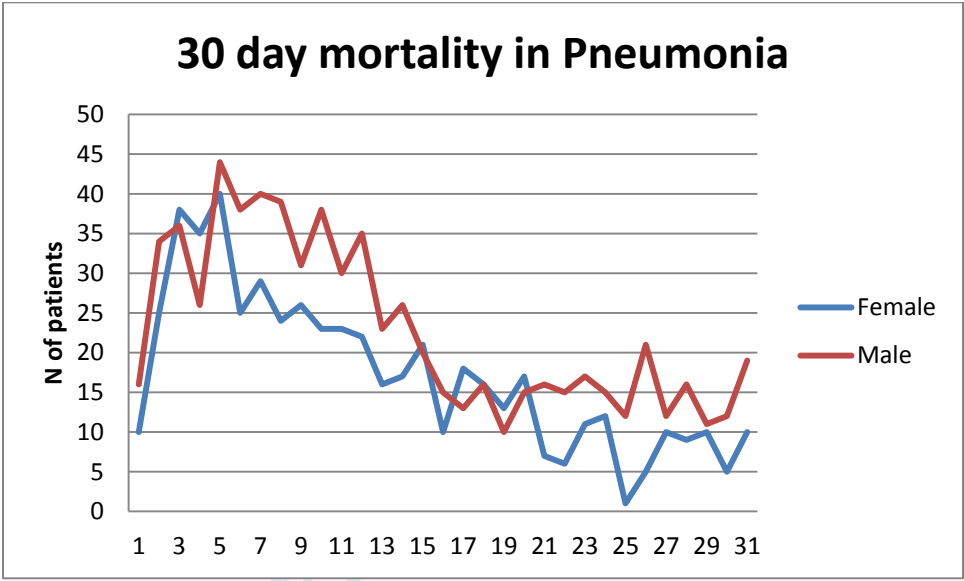

Peer review only

Supplementary Figure 4: 30 day readmission in AMI

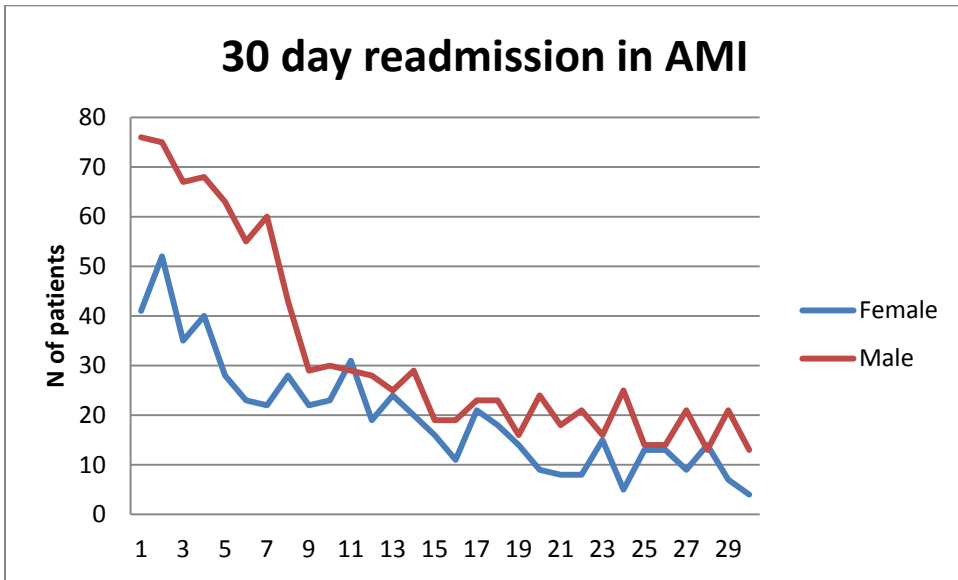

1  
2  
3  
4  
5  
6  
7  
8  
9  
10  
11  
12  
13  
14  
15  
16  
17  
18  
19  
20  
21  
22  
23  
24  
25  
26  
27  
28  
29  
30  
31  
32  
33  
34  
35  
36  
37  
38  
39  
40  
41  
42  
43  
44  
45  
46  
47  
48  
49  
50  
51  
52  
53  
54  
55  
56  
57  
58  
59  
60

Supplementary Figure 5: 30 day readmission in ADHF

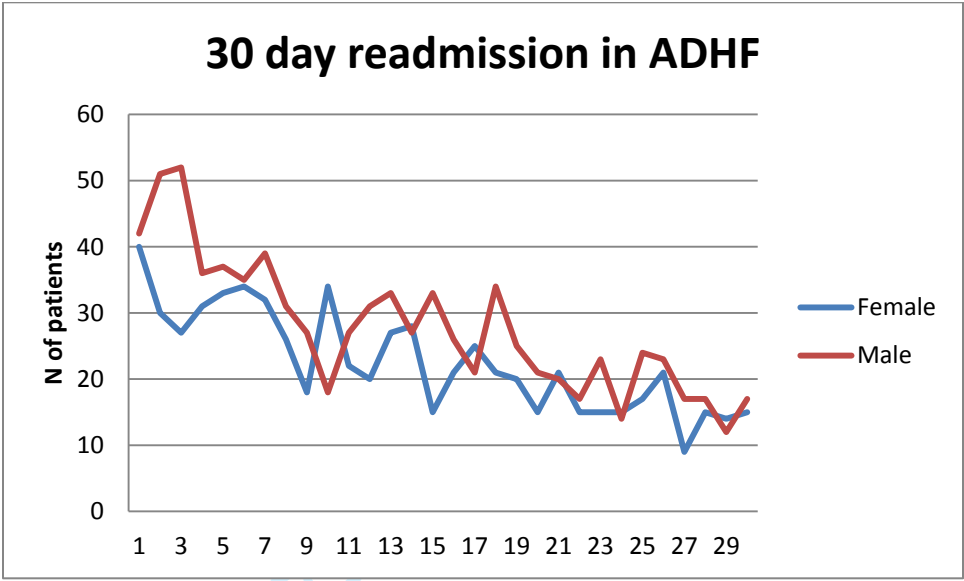

Peer review only

Supplementary Figure 6: 30 day readmission in pneumonia

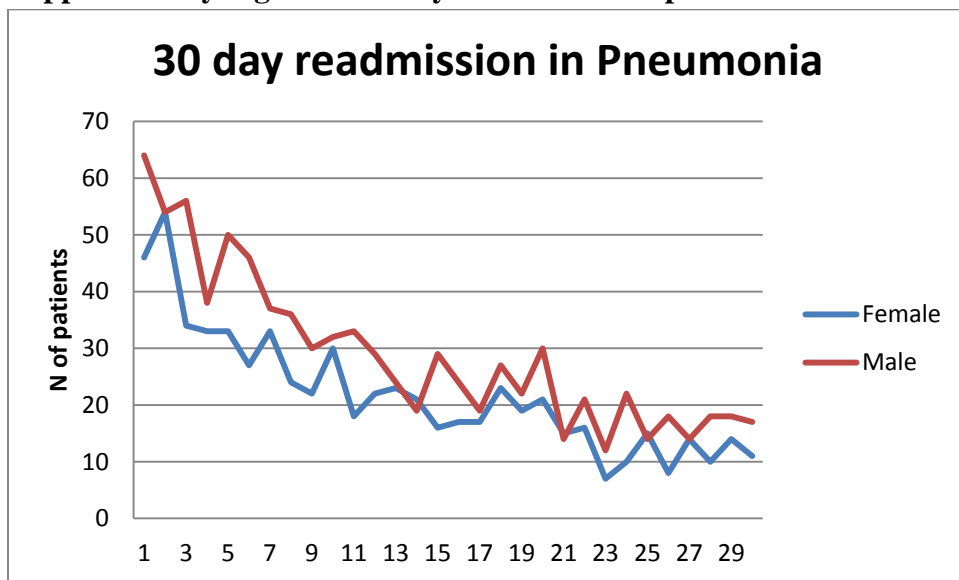

## STROBE Statement—checklist of items that should be included in reports of observational studies

|                              | Item No | Recommendation                                                                                                                                                                                                                                                                                                                                                                                                                                                         | Page number |
|------------------------------|---------|------------------------------------------------------------------------------------------------------------------------------------------------------------------------------------------------------------------------------------------------------------------------------------------------------------------------------------------------------------------------------------------------------------------------------------------------------------------------|-------------|
| <b>Title and abstract</b>    | 1       | (a) Indicate the study's design with a commonly used term in the title or the abstract                                                                                                                                                                                                                                                                                                                                                                                 | 1           |
|                              |         | (b) Provide in the abstract an informative and balanced summary of what was done and what was found                                                                                                                                                                                                                                                                                                                                                                    | 2           |
| <b>Introduction</b>          |         |                                                                                                                                                                                                                                                                                                                                                                                                                                                                        |             |
| Background/rationale         | 2       | Explain the scientific background and rationale for the investigation being reported                                                                                                                                                                                                                                                                                                                                                                                   | 4           |
| Objectives                   | 3       | State specific objectives, including any prespecified hypotheses                                                                                                                                                                                                                                                                                                                                                                                                       | 5           |
| <b>Methods</b>               |         |                                                                                                                                                                                                                                                                                                                                                                                                                                                                        |             |
| Study design                 | 4       | Present key elements of study design early in the paper                                                                                                                                                                                                                                                                                                                                                                                                                | 7           |
| Setting                      | 5       | Describe the setting, locations, and relevant dates, including periods of recruitment, exposure, follow-up, and data collection                                                                                                                                                                                                                                                                                                                                        | 7           |
| Participants                 | 6       | (a) <i>Cohort study</i> —Give the eligibility criteria, and the sources and methods of selection of participants. Describe methods of follow-up<br><i>Case-control study</i> —Give the eligibility criteria, and the sources and methods of case ascertainment and control selection. Give the rationale for the choice of cases and controls<br><i>Cross-sectional study</i> —Give the eligibility criteria, and the sources and methods of selection of participants | 7           |
|                              |         | (b) <i>Cohort study</i> —For matched studies, give matching criteria and number of exposed and unexposed<br><i>Case-control study</i> —For matched studies, give matching criteria and the number of controls per case                                                                                                                                                                                                                                                 |             |
| Variables                    | 7       | Clearly define all outcomes, exposures, predictors, potential confounders, and effect modifiers. Give diagnostic criteria, if applicable                                                                                                                                                                                                                                                                                                                               | 8           |
| Data sources/<br>measurement | 8*      | For each variable of interest, give sources of data and details of methods of assessment (measurement). Describe comparability of assessment methods if there is more than one group                                                                                                                                                                                                                                                                                   | 8           |
| Bias                         | 9       | Describe any efforts to address potential sources of bias                                                                                                                                                                                                                                                                                                                                                                                                              | 8           |
| Study size                   | 10      | Explain how the study size was arrived at                                                                                                                                                                                                                                                                                                                                                                                                                              | 8           |
| Quantitative variables       | 11      | Explain how quantitative variables were handled in the analyses. If applicable, describe which groupings were chosen and why                                                                                                                                                                                                                                                                                                                                           |             |
| Statistical methods          | 12      | (a) Describe all statistical methods, including those used to control for confounding                                                                                                                                                                                                                                                                                                                                                                                  | 8           |
|                              |         | (b) Describe any methods used to examine subgroups and interactions                                                                                                                                                                                                                                                                                                                                                                                                    |             |
|                              |         | (c) Explain how missing data were addressed                                                                                                                                                                                                                                                                                                                                                                                                                            |             |
|                              |         | (d) <i>Cohort study</i> —If applicable, explain how loss to follow-up was addressed<br><i>Case-control study</i> —If applicable, explain how matching of cases and controls was addressed<br><i>Cross-sectional study</i> —If applicable, describe analytical methods taking account of sampling strategy                                                                                                                                                              |             |
|                              |         | (e) Describe any sensitivity analyses                                                                                                                                                                                                                                                                                                                                                                                                                                  |             |

Continued on next page

| <b>Results</b>           |                                                                                                                                                                                                                                                                                                                                                                                                                  | <b>Page number</b> |
|--------------------------|------------------------------------------------------------------------------------------------------------------------------------------------------------------------------------------------------------------------------------------------------------------------------------------------------------------------------------------------------------------------------------------------------------------|--------------------|
| Participants             | 13* (a) Report numbers of individuals at each stage of study—eg numbers potentially eligible, examined for eligibility, confirmed eligible, included in the study, completing follow-up, and analysed<br>(b) Give reasons for non-participation at each stage<br>(c) Consider use of a flow diagram                                                                                                              | 9                  |
| Descriptive data         | 14* (a) Give characteristics of study participants (eg demographic, clinical, social) and information on exposures and potential confounders<br>(b) Indicate number of participants with missing data for each variable of interest<br>(c) <i>Cohort study</i> —Summarise follow-up time (eg, average and total amount)                                                                                          | 9                  |
| Outcome data             | 15* <i>Cohort study</i> —Report numbers of outcome events or summary measures over time<br><i>Case-control study</i> —Report numbers in each exposure category, or summary measures of exposure<br><i>Cross-sectional study</i> —Report numbers of outcome events or summary measures                                                                                                                            | 9-11               |
| Main results             | 16 (a) Give unadjusted estimates and, if applicable, confounder-adjusted estimates and their precision (eg, 95% confidence interval). Make clear which confounders were adjusted for and why they were included<br>(b) Report category boundaries when continuous variables were categorized<br>(c) If relevant, consider translating estimates of relative risk into absolute risk for a meaningful time period | 9-11               |
| Other analyses           | 17 Report other analyses done—eg analyses of subgroups and interactions, and sensitivity analyses                                                                                                                                                                                                                                                                                                                | 10-11              |
| <b>Discussion</b>        |                                                                                                                                                                                                                                                                                                                                                                                                                  |                    |
| Key results              | 18 Summarise key results with reference to study objectives                                                                                                                                                                                                                                                                                                                                                      | 11-12              |
| Limitations              | 19 Discuss limitations of the study, taking into account sources of potential bias or imprecision. Discuss both direction and magnitude of any potential bias                                                                                                                                                                                                                                                    | 12-13              |
| Interpretation           | 20 Give a cautious overall interpretation of results considering objectives, limitations, multiplicity of analyses, results from similar studies, and other relevant evidence                                                                                                                                                                                                                                    | 13                 |
| Generalisability         | 21 Discuss the generalisability (external validity) of the study results                                                                                                                                                                                                                                                                                                                                         | 13                 |
| <b>Other information</b> |                                                                                                                                                                                                                                                                                                                                                                                                                  |                    |
| Funding                  | 22 Give the source of funding and the role of the funders for the present study and, if applicable, for the original study on which the present article is based                                                                                                                                                                                                                                                 | 14                 |

\*Give information separately for cases and controls in case-control studies and, if applicable, for exposed and unexposed groups in cohort and cross-sectional studies.

**Note:** An Explanation and Elaboration article discusses each checklist item and gives methodological background and published examples of transparent reporting. The STROBE checklist is best used in conjunction with this article (freely available on the Web sites of PLoS Medicine at <http://www.plosmedicine.org/>, Annals of Internal Medicine at <http://www.annals.org/>, and Epidemiology at <http://www.epidem.com/>). Information on the STROBE Initiative is available at [www.strobe-statement.org](http://www.strobe-statement.org).

# BMJ Open

## Gender Disparities among Hospitalized Patients, a retrospective cohort study

|                                 |                                                                                                                                                                  |
|---------------------------------|------------------------------------------------------------------------------------------------------------------------------------------------------------------|
| Journal:                        | <i>BMJ Open</i>                                                                                                                                                  |
| Manuscript ID                   | bmjopen-2018-022782.R1                                                                                                                                           |
| Article Type:                   | Research                                                                                                                                                         |
| Date Submitted by the Author:   | 06-Aug-2018                                                                                                                                                      |
| Complete List of Authors:       | alsawas, mouaz; Mayo Clinic, Wang, Zhen; Mayo Clinic, Murad, M. Hassan; Mayo Clinic Yousufuddin, Mohammed; Mayo Clinic Health System, Hospital Internal Medicine |
| <b>Primary Subject Heading</b>: | Health services research                                                                                                                                         |
| Secondary Subject Heading:      | Medical management                                                                                                                                               |
| Keywords:                       | INTERNAL MEDICINE, CARDIOLOGY, Respiratory infections < THORACIC MEDICINE                                                                                        |
|                                 |                                                                                                                                                                  |

SCHOLARONE™  
Manuscripts

1  
2  
3 Gender Disparities among Hospitalized Patients, a retrospective cohort study  
4

5 Mouaz Alsawas\*, M.D., M.Sc.<sup>1</sup>; Zhen Wang, Ph.D<sup>1</sup>; M. Hassan Murad,  
6 M.D, M.P.H<sup>1</sup>; Mohammed Yousufuddin, M.D, M.Sc<sup>2</sup>.  
7  
8  
9

10  
11  
12  
13  
14 <sup>1</sup>Evidence-based Practice Center, Mayo Clinic Robert D. and Patricia E. Kern Center for the  
15 Science of Health Care Delivery, Mayo Clinic, Rochester, MN.  
16

17 <sup>2</sup>Department of Hospital Internal Medicine, Mayo Clinic Health System, Austin, Minnesota  
18

19 \* Corresponding author:

20 Mouaz Alsawas, M.D., M.Sc

21 200 First Street SW

22 Rochester, MN 55902

23 Phone: (507)266-2441

24 Fax: 507 284 1731

25 Email: Alsawas.Mouaz@mayo.edu  
26  
27  
28  
29  
30  
31  
32  
33  
34  
35  
36  
37  
38  
39  
40  
41  
42  
43  
44  
45  
46  
47  
48  
49  
50  
51  
52  
53  
54  
55  
56  
57  
58  
59  
60



**Abstract:**

**Objective:** To assess gender disparity in outcomes among hospitalized patients with acute myocardial infarction (AMI), acute decompensated heart failure (ADHF), or pneumonia.

**Design:** A retrospective cohort study.

**Setting:** A tertiary referral center in Midwest, USA.

**Participants:** We evaluated 12,265 adult patients hospitalized with ADHF, 15,777 with AMI and 12,929 with pneumonia, from January 1, 1995 through August 31, 2015.

Patients were selected using ICD-9 codes.

**Primary and secondary outcome measures:** Prevalence of comorbidities, 30 day mortality, and 30 day readmission. Comorbidities were chosen from the twenty chronic conditions, specified by the Office of the Assistant Secretary for Health. Logistic regression analysis was conducted adjusting for multiple confounders.

**Results:** Prevalence of comorbidities was significantly different between men and women in all 3 conditions. After adjusting for age, length of stay, multi-comorbidities, and residence, there was no significant difference in 30 day mortality between men and women in AMI or ADHF, but men with pneumonia had slightly higher 30 day mortality with an odds ratio (OR) of 1.19 (95% CI 1.06 to 1.34). There was no significant difference in 30 day readmission between men and women with AMI or pneumonia, but women with ADHF were slightly more likely to be readmitted within 30 days with OR 0.90 (95% CI 0.82 to 0.99).

**Conclusion:** Gender differences in the distribution of comorbidities exist in patients hospitalized with AMI, ADHF, and pneumonia. However, there is minimal clinically

1  
2  
3  
4  
5  
6  
7  
8  
9  
10  
11  
12  
13  
14  
15  
16  
17  
18  
19  
20  
21  
22  
23  
24  
25  
26  
27  
28  
29  
30  
31  
32  
33  
34  
35  
36  
37  
38  
39  
40  
41  
42  
43  
44  
45  
46  
47  
48  
49  
50  
51  
52  
53  
54  
55  
56  
57  
58  
59  
60

meaningful impact of these differences on outcomes. Efforts to address gender difference may need to be diverted towards targeting overall population health, reducing race/ethnicity disparity, and improving access to care.

For peer review only

## Article summary:

### Strengths and limitations of this study:

- The strengths of this study include the large sample size, multivariable adjustment and sensitivity analyses to assess robustness of findings.
- A limitation of this study is including all patients that were hospitalized in a single regional tertiary center; these patients were from several different states and some from were from other countries. We might have under estimated the mortality or readmission rates if these patients were readmitted to a different hospital closer to their residency place after discharge.
- A limitation of this study is that the majority of the included patients were white; the results may not be generalizable to people from other races.

## Introduction:

Acute decompensated heart failure (ADHF), acute myocardial infarction (AMI), and pneumonia are among the most common causes of hospitalization in the United States, with more than 2.5 million hospitalizations per year, and estimated annual hospital cost of \$31.3 billion.<sup>1,2</sup> Hospitalized patients with ADHF, AMI, or pneumonia are at high risk of death and readmission at 30 days after index hospitalization.<sup>1,2</sup> In the United States, 15.1% of patients with acute myocardial infarction (AMI), 11.4% of patients with ADHF, and 11.3% patients with pneumonia die within 30 days after hospitalization for respective disorders.<sup>3,4</sup> Likewise, 24.8%, 19.9% and 18.3% of patients hospitalized for ADHF, AMI, and pneumonia respectively are readmitted within 30 days of the first hospitalization.<sup>5</sup> Annually, the Centers for Medicare & Medicaid Services (CMS) publically reports a comprehensive overview of national performance as part of the Hospital Inpatient Quality Reporting (IQR) Program, using these three conditions.<sup>1,2</sup> Risk standardized 30-day mortality and readmission rates are quality performance measures for AMI, ADHF, and pneumonia.<sup>6</sup> However, these outcomes vary between males and females.<sup>5</sup> In the past several decades, gender disparities in clinical outcomes of hospitalized patients with different diseases have been investigated.<sup>7,8</sup> Several studies suggested gender differences in clinical outcomes for patients with AMI, ADHF and Pneumonia.<sup>9-12</sup> Females have worse outcomes for pneumonia than males, with adjusted risk ratio of 1.15 for 28 days mortality.<sup>13</sup> Women with acute coronary syndromes were at a higher risk for unadjusted in-hospital death (5.6% vs. 4.3%)<sup>8</sup> and they are more likely to have adverse outcomes (myocardial infarction, stroke and readmission) compared to men (odds ratio 1.24, 95% CI 1.14 to 1.34).<sup>14</sup>

1  
2  
3 Although no gender differences were found in outcomes in patients with ADHF, there  
4 were significant gender differences in the clinical characteristics at presentation including  
5 age and comorbidities.<sup>9</sup>  
6  
7

8  
9  
10 Multimorbidity, defined as existence of two or more disorders in an individual patient,  
11 has become a public health issue of increasing magnitude. Around one third of all  
12 Americans have multimorbidity (31.5%), and the rate is expected to increase with time.<sup>15</sup>  
13  
14 Multimorbidity is associated with premature death, propensity for over investigation,  
15 duplicate tests, medication non-adherence, polypharmacy with increased risk for drug  
16 adverse events, and a decline in functional status.<sup>15</sup> Multimorbidity itself may have  
17 gender disparities. The US National Health and Nutrition Examination Survey  
18 (NHANES) when looking at persons 65 years and older found that 83% of women  
19 compared to 65% men with coronary artery disease had one of the four comorbid  
20 conditions (arthritis, chronic lower respiratory tract disease, diabetes mellitus, and  
21 stroke).<sup>16</sup> European data suggest a similar difference in prevalence of multimorbidity  
22 between men and women.<sup>17</sup>  
23  
24  
25  
26  
27  
28  
29  
30  
31  
32  
33  
34  
35  
36

37 Although the above data provide sex-related differences in the prevalence of  
38 multimorbidity in specific patient population, the disparity in rates of occurrence of  
39 comorbid conditions and their impact on early clinical outcome have not been reported  
40 by gender for broader hospitalized patients with ADHF, AMI, and pneumonia.  
41  
42  
43  
44

45 To address this gap in knowledge, we evaluated gender-specific differences in prevalence  
46 of individual and multiple comorbid conditions in a large hospital-based patient  
47 population with ADHF, AMI, and pneumonia. Furthermore, we determined whether the  
48  
49  
50  
51  
52  
53  
54  
55  
56  
57  
58  
59  
60

1  
2  
3  
4  
5  
6  
7  
8  
9  
10  
11  
12  
13  
14  
15  
16  
17  
18  
19  
20  
21  
22  
23  
24  
25  
26  
27  
28  
29  
30  
31  
32  
33  
34  
35  
36  
37  
38  
39  
40  
41  
42  
43  
44  
45  
46  
47  
48  
49  
50  
51  
52  
53  
54  
55  
56  
57  
58  
59  
60

presence of individual or multimorbidity impacts 30-day mortality or readmission by gender independent of demographic and social characteristics.

For peer review only

## Methods:

### Study design and Population sample:

This is a retrospective study of patients aged  $\geq 18$  years hospitalized for ADHF, AMI, and pneumonia at Mayo Clinic, Rochester, Minnesota, from January 1, 1995 to August 31, 2015.

We included first hospitalization in the analysis when a patient had multiple repeat hospitalizations for the same condition, since patients with multiple hospitalizations with the same condition may have higher risk of readmission or mortality within 30 days. The data were extracted by dedicated abstraction personnel using International Classification of Diseases, Ninth Revision, Clinical Modification (ICD-9-CM) codes (supplementary tables 1-3). We abstracted data-related to age, gender, race, zip code, insurance, principal discharge diagnosis, secondary diagnoses, length of hospital stay, death, and readmission by date. The diagnoses of AMI, ADHF, and pneumonia were based on physician provider as documented in clinical notes. Patients who refused participation in clinical research were excluded. The study was approved by the Mayo Clinic Institutional Review Board.

**Patient and Public Involvement:** patients and public were not involved.

### Measure of multi-comorbidities:

Comorbidities were chosen from twenty chronic conditions (Supplementary Table 4) specified by the Office of the Assistant Secretary for Health (OASH)<sup>18</sup> using ICD-9-CM codes (Supplementary table 5). Multi-comorbidities were categorized into four groups based on the number of existing chronic conditions: less than 2 comorbidities, 2 comorbidities, 3 comorbidities, and 4 or more comorbidities.

1  
2  
3 We did not use composite morbidity index such as Charlson, since it needed to be  
4 modified for this study. For example, we did not count coronary artery disease (CAD) as  
5 one of the comorbidities for patients hospitalized for AMI, the same for congestive heart  
6 failure for patients with ADHF.  
7  
8  
9  
10

11  
12 We excluded 4-comorbid conditions (autism, schizophrenia, hepatitis, and HIV) from the  
13 analysis because of very low frequency of occurrence (<1%).  
14  
15  
16

### 17 **Measures of outcomes:**

18  
19 The primary outcomes were prevalence of comorbidities in men and women, 30 day  
20 mortality, defined as 30 days from the day of admission with one of the primary  
21 diagnosis, and 30 day readmission for any cause since discharge date.  
22  
23  
24  
25  
26  
27

### 28 **Statistical analysis:**

29  
30 Baseline characteristic data were summarized as mean and standard deviation for  
31 continuous variables and as for categorical variables. Prevalence of comorbidities and the  
32 number of multi-morbidities in men and women were compared using Chi<sup>2</sup> tests.  
33  
34  
35  
36

37 Gender differences in 30 day mortality and 30 day readmission were presented as odds  
38 ratio. Logistic regression models were developed to estimate the risk of outcomes of  
39 interest while controlling for various confounders (age, length of stay, Olmsted county  
40 residency, and number of comorbidities). Results are reported as odds ratios and 95%  
41 confidence intervals (CI). A two-tailed P value <0.05 was considered as statistically  
42 significant and all analyses were performed using STATA 14.0 (StataCorp, College  
43 Station, Texas).  
44  
45  
46  
47  
48  
49  
50  
51  
52  
53  
54  
55  
56  
57  
58  
59  
60



## Results:

40,971 patients were included during the study period, 12,265 with ADHF, 15,777 with AMI, and 12,929 with pneumonia. There were more men in all three conditions, and men were younger. (Table 1)

The prevalence of each comorbidity in men and women were reported in Table 1. The majority of deaths due to AMI occurred in the first 10 days; whereas this trend was not evidence for pneumonia or ADHF (Supplementary figures 1-3). The majority of readmissions for all three conditions occurred in the first 15 days (Supplementary figures 4-6).

### Summary of outcomes

#### ADHF:

12,265 patients were hospitalized with ADHF within the study period, 7,010 men and 5,255 women. Women were older with a mean age of 75.4 years compared to 72.3 years in men. 85.75% of both men and women were Caucasian. 71.94 % of men had multi-comorbidities compared to 69.99 % of women.

After adjusting for age, length of stay, residence place (Olmsted county vs. non-Olmsted), and multi-comorbidities, OR for 30 day mortality for men vs. women was 0.94 (95% CI: 0.82, 1.07), OR for 30 day readmission 0.90 (95% CI: 0.82, 0.99). (Table 2), (Figure 1)

A subgroup analysis including patients who had CAD was conducted, OR for 30 day mortality was 0.89 (0.73 to 1.09)  $p=0.27$ , and OR for 30 day readmission was 0.90 (0.75 to 1.082)  $p=0.27$ .

#### AMI:

1  
2  
3 Of the 15,777 patients hospitalized with AMI 10,280 were men and 5,497 were women.  
4  
5 Women were older, with a mean age of 73 years compared to 66.5 years in men. 86.78%  
6  
7 of patients were Caucasian (87% of men and 86% in women) (Table 1). 46.73 % of men  
8  
9 had multi-comorbidities compared to 52.17 % of women.  
10

11  
12 After adjusting for age, length of stay, residence place (Olmsted county vs. non-  
13  
14 Olmsted), and multi-comorbidities, OR for 30 day mortality for men vs. women was 0.98  
15  
16 (95% CI: 0.86, 1.11), OR for 30 day readmission 0.90 (95% CI: 0.79, 1.04). (Table 2)  
17  
18 (Figure 1)  
19

20  
21 A subgroup analysis including patients who had heart failure was conducted, OR for 30  
22  
23 day mortality was 1.18 (1.007 to 1.37)  $p=0.04$ , and OR for 30 day readmission: 0.89  
24  
25 (0.72 to 1.09)  $p=0.26$ .  
26  
27

### 28 29 **Pneumonia:**

30  
31 Of the 12,929 patients hospitalized with pneumonia within the study period, three were  
32  
33 7,073 men and 5,856 women. Women were older with a mean age of 70.8 compared to  
34  
35 69.2 years in men. 85% of both men and women were Caucasian. 58.89% of men had  
36  
37 multi-comorbidities compared to 55.79% of women.  
38  
39

40  
41 After adjusting for age, length of stay, residence place (Olmsted county vs. non-  
42  
43 Olmsted), and multi-comorbidities, OR for 30 day mortality for men vs. women was 1.19  
44  
45 (95% CI 1.06, 1.34), OR for 30 day readmission 1.10 (95% CI 0.99, 1.23). (Table 2)  
46  
47 (Figure 1)  
48

49  
50 A subgroup analysis including patients who had CAD was conducted, OR for 30 day  
51  
52 mortality was 1.21 (0.93 to 1.56)  $p=0.15$ , and OR for 30 day readmission was 1.06 (0.81  
53  
54 to 1.39)  $p=0.65$ .  
55  
56  
57  
58  
59

1  
2  
3 A subgroup analysis including patients who had heart failure was conducted, OR for 30  
4 day mortality was 1.089 (0.89 to 1.33)  $p=0.404$ , and OR for 30 day  
5 readmission: 1.21 (1.007 to 1.46)  $p=0.042$ .  
6  
7

### 8 **Sensitivity analysis:**

9  
10 To determine the contemporary status of gender disparities and comorbidities, we  
11 conducted a sensitivity analysis focusing on patients who were admitted in the last 5  
12 years. The results were overall consistent with the main analysis, except for 30 day  
13 mortality for pneumonia (which became nonsignificant between men and women  
14 whereas mortality was marginally higher in men, in the original analysis).  
15  
16 (Supplementary table 6).  
17  
18

19 We conducted another sensitivity analysis, looking for 15 day mortality and readmission.  
20 There were no statistically significant differences in 15 day readmission between men  
21 and women in all 3 conditions. 15 day mortality was marginally higher for pneumonia in  
22 men OR: 1.15 (95% CI: 1.00 to 1.33) but not statistically significant different in AMI or  
23 ADHF (Supplementary table 7).  
24  
25

### 26 **Discussion:**

27 This study suggests that comorbidities are distributed differently between men and  
28 women hospitalized for ADHF, AMI and pneumonia. Despite a fairly large sample size,  
29 this study showed that gender differences appear to have minimal meaningful impact on  
30 outcomes.  
31  
32

33 In AMI, women are known to less commonly report chest pain or discomfort compared  
34 with men, this may lead to gender differences in outcomes of AMI.<sup>19</sup> However, in our  
35 study, the gender difference in 30-day mortality could be explained by the age difference,  
36  
37

1  
2  
3 women were 6.5 years older in average. After adjusting for residency location and  
4  
5 number of comorbidities, age had a significant impact on 30 day mortality, but not gender  
6  
7 or multi-comorbidities. On the other hand, the only factor that had a significant  
8  
9 association with 30 day readmission was multi-comorbidities.  
10

11  
12 In ADHF, men had significantly lower 30 day readmission rate compared to women,  
13  
14 while they did not have a significant difference in 30 day mortality. A sensitivity analysis  
15  
16 including only patients for the last 5 years, showed similar results. Multi-comorbidity did  
17  
18 not have a significant effect on 30 day mortality or readmission. This might be explained  
19  
20 by difference in symptoms presentations, or difference in access to medical care between  
21  
22 men and women. For example, men used to have higher invasive cardiac procedures than  
23  
24 women in a previously published study.<sup>20</sup>  
25  
26

27  
28 Men with pneumonia had significantly higher 30 day mortality compared to women, but  
29  
30 no significant difference in 30 day readmission. Multi-comorbidities had a significant  
31  
32 effect on 30 day readmission in men but not in women.  
33  
34

### 35 **Comparison with existing literature**

36  
37 Our findings in AMI were consistent with previously published studies<sup>11,21</sup> that showed a  
38  
39 higher 30 day mortality rate in women verses men, but no significant difference after  
40  
41 adjustment for other variables. In these studies, they include elderly patients only (> 65  
42  
43 years old) while we had no age restriction, but yet, in all of these studies, women were  
44  
45 older, and had differences in comorbidities compared to men. In ADHF, our results were  
46  
47 consistent with a previously published study that used ADHERE (Acute Decompensated  
48  
49 Heart Failure National Registry) between 2001 and 2004<sup>9</sup>, in both studies there was no  
50  
51 significant difference in in-hospital mortality between men and women.  
52  
53  
54  
55  
56  
57  
58  
59  
60

1  
2  
3 In pneumonia, our study showed that men have worse outcomes than women, unlike a  
4  
5 previous study<sup>13</sup> that found that women have worse outcomes for community-acquired  
6  
7 pneumonia with 28-day mortality odds ratio of 1.15 (95% CI 1.02–1.30). However, our  
8  
9 study included all types of pneumonia, and it was consistent with another study that used  
10  
11 the Medicare database and showed worse outcomes in men<sup>22</sup>.  
12  
13

### 14 15 **Limitations and strengths**

16  
17 A limitation of this study is that we used ICD-9 codes for identifying patients. It was not  
18  
19 feasible to review charts for such a large number of patients; and therefore, we had to  
20  
21 depend on administrative and billing codes. New research using the recent ICD-10  
22  
23 coding is needed to study the consistency of prevalence and implication of comorbidities  
24  
25 on early outcomes in hospitalized patients. Another limitation is that we included all  
26  
27 patients that were hospitalized in a single regional tertiary center; these patients were  
28  
29 from several different states and some from were from other countries. We might have  
30  
31 under estimated the mortality or readmission rates if these patients were readmitted to a  
32  
33 different hospital closer to their residency place after discharge. Making this less  
34  
35 concerning is the fact that we found, gender to be an independent variable from residency  
36  
37 place; in addition, we adjusted for residency place (Olmsted County where the hospital is  
38  
39 vs. non Olmsted County). Another limitation is that the majority of our included patients  
40  
41 were white; our results may not be generalizable to people from other races. Other  
42  
43 limitation in our data is that we have included only the first hospitalization; some patients  
44  
45 have likely had multiple repeat hospitalizations for the same condition. The strengths of  
46  
47 this study include the large sample size, multivariable adjustment and sensitivity analyses  
48  
49 to assess robustness of findings.  
50  
51  
52  
53  
54  
55  
56  
57  
58  
59  
60

**Clinical and policy implication:**

Although this study showed that women hospitalized for ADHF had higher 30 day readmission rate, the absolute risk was small with a number needed to harm of 88 patients (95% CI: 48, 445). For pneumonia, women had lower mortality, with a number needed to harm of 61 patients (95% CI: 36, 202). With this minimal clinically meaningful impact of these differences on the early outcomes of these three important conditions; efforts to address gender difference may need to be diverted towards targeting overall population health, where outcomes of these conditions are still suboptimal in both genders, or towards reducing race/ethnicity disparity, or improving access to care differences.

**Conclusion:**

Gender disparities interact with comorbidities and impact mortality and readmission. However, this effect varies according to the conditions, seems to be unpredictable and has a minimal meaningful impact on outcomes.

**Funding:**

This publication was made possible by CTSA Grant Number UL1 TR000135 from the National Center for Advancing Translational Sciences (NCATS), a component of the National Institutes of Health (NIH). Its contents are solely the responsibility of the authors and do not necessarily represent the official view of NIH.

**Contributors:** MA conception and design of the study, data collection, data analysis, interpreted results, drafted and revised manuscript; ZW data analysis, manuscript revision and approval of final draft; MHM contributed to study design, manuscript development, approval of final draft; MY: developed the idea for the study, interpreted results, revised manuscript, approval of final draft.

**Competing interests:** None declared

**Ethics approval:** Mayo Clinic Institutional Review Committee (IRB).

**Provenance and peer review:** Not commissioned; externally peer reviewed.

**Data sharing statement:** No additional data are available.

## References:

1. Jennifer Schwartz P, MPH, Kelly M. Strait M, Amena Keshawarz M, et al. *CMS Medicare Hospital Quality Chartbook, Performance Report on Outcome Measures*. SEPTEMBER 2014.
2. Pfuntner A, Wier LM, Steiner C. Costs for Hospital Stays in the United States, 2010: Statistical Brief #146. *Healthcare Cost and Utilization Project (HCUP) Statistical Briefs*. Rockville (MD)2006.
3. Suter L, Li S-X, Grady J, et al. National Patterns of Risk-Standardized Mortality and Readmission After Hospitalization for Acute Myocardial Infarction, Heart Failure, and Pneumonia: Update on Publicly Reported Outcomes Measures Based on the 2013 Release. *J GEN INTERN MED*. 2014;29(10):1333-1340.
4. Lindenauer PK, Bernheim SM, Grady JN, et al. The performance of US hospitals as reflected in risk-standardized 30-day mortality and readmission rates for medicare beneficiaries with pneumonia. *J Hosp Med*. 2010;5(6):822.
5. Dharmarajan K, Hsieh AF, Lin Z, et al. Diagnoses and timing of 30-day readmissions after hospitalization for heart failure, acute myocardial infarction, or pneumonia. *JAMA*. 2013;309(4):355-363.
6. <https://www.cms.gov/medicare/quality-initiatives-patient-assessment-instruments/hospitalqualityinits/outcomemeasures.html>.
7. Crabtree TD, Pelletier SJ, Gleason TG, Pruett TL, Sawyer RG. Gender-dependent differences in outcome after the treatment of infection in hospitalized patients. *JAMA*. 1999;282(22):2143-2148.
8. Blomkalns AL, Chen AY, Hochman JS, et al. Gender disparities in the diagnosis and treatment of non-ST-segment elevation acute coronary syndromesLarge-scale observations from the CRUSADE (Can Rapid Risk Stratification of Unstable Angina Patients Suppress Adverse Outcomes With Early Implementation of the American College of Cardiology/American Heart Association Guidelines) National Quality Improvement Initiative. *J Am Coll Cardiol*. 2005;45(6):832-837.
9. Galvao M, Kalman J, DeMarco T, et al. Gender differences in in-hospital management and outcomes in patients with decompensated heart failure: analysis from the Acute Decompensated Heart Failure National Registry (ADHERE). *J Card Fail*. 2006;12(2):100-107.
10. Thomsen RW, Riis A, Norgaard M, et al. Rising incidence and persistently high mortality of hospitalized pneumonia: a 10-year population-based study in Denmark. *J Intern Med*. 2006;259(4):410-417.
11. Berger JS, Elliott L, Gallup D, et al. Sex differences in mortality following acute coronary syndromes. *JAMA*. 2009;302(8):874-882.

12. Vaccarino V, Parsons L, Every NR, Barron HV, Krumholz HM. Sex-Based Differences in Early Mortality after Myocardial Infarction. *New England Journal of Medicine*. 1999;341(4):217-225.
13. Arnold FW, Wiemken TL, Peyrani P, Mirsaeidi M, Ramirez JA. Outcomes in females hospitalised with community-acquired pneumonia are worse than in males. *Eur Respir J*. 2013;41(5):1135-1140.
14. Dey S, Flather MD, Devlin G, et al. Sex-related differences in the presentation, treatment and outcomes among patients with acute coronary syndromes: the Global Registry of Acute Coronary Events. *Heart*. 2009;95(1):20-26.
15. Boyd CM, Fortin M. Future of multimorbidity research: how should understanding of multimorbidity inform health system design. *Public Health Rev*. 2010;32(2):451-474.
16. Weiss CO, Boyd CM, Yu Q, Wolff JL, Leff B. Patterns of prevalent major chronic disease among older adults in the United States. *JAMA*. 2007;298(10):1160-1162.
17. Abad-Diez JM, Calderon-Larranaga A, Poncel-Falco A, et al. Age and gender differences in the prevalence and patterns of multimorbidity in the older population. *BMC Geriatr*. 2014;14:75.
18. Goodman RA, Posner SF, Huang ES, Parekh AK, Koh HK. Defining and measuring chronic conditions: imperatives for research, policy, program, and practice. *Prev Chronic Dis*. 2013;10:E66.
19. Canto JG, Goldberg RJ, Hand MM, et al. Symptom presentation of women with acute coronary syndromes: myth vs reality. *Arch Intern Med*. 2007;167(22):2405-2413.
20. Giles WH, Anda RF, Casper ML, Escobedo LG, Taylor HA. Race and sex differences in rates of invasive cardiac procedures in US hospitals. Data from the National Hospital Discharge Survey. *Arch Intern Med*. 1995;155(3):318-324.
21. Canto JG, Rogers WJ, Goldberg RJ, et al. Association of age and sex with myocardial infarction symptom presentation and in-hospital mortality. *JAMA*. 2012;307(8):813-822.
22. Kaplan V, Angus DC, Griffin MF, Clermont G, Scott Watson R, Linde-Zwirble WT. Hospitalized community-acquired pneumonia in the elderly: age- and sex-related patterns of care and outcome in the United States. *Am J Respir Crit Care Med*. 2002;165(6):766-772.



1  
2  
3 **Legends:**  
4

5 **Table 1: Baseline characteristics**  
6

7 **Table 2: Adjusted outcomes**  
8

9  
10 **Figure 1: Adjusted outcomes 30 day mortality and 30 day readmission in men vs.**  
11 **women.**  
12  
13  
14  
15  
16  
17  
18  
19  
20  
21  
22  
23  
24  
25  
26  
27  
28  
29  
30  
31  
32  
33  
34  
35  
36  
37  
38  
39  
40  
41  
42  
43  
44  
45  
46  
47  
48  
49  
50  
51  
52  
53  
54  
55  
56  
57  
58  
59  
60

For peer review only

**Table 1: Baseline characteristics**

|                       | AMI = 15,777   |                |         | ADHF =12,265    |                |            | Pneumonia = 12,929 |                |            |
|-----------------------|----------------|----------------|---------|-----------------|----------------|------------|--------------------|----------------|------------|
|                       | Men<br>65%     | Women<br>35%   | P value | Men<br>57%      | Women<br>43%   | P<br>value | Men<br>55%         | Women<br>45%   | P<br>value |
| <b>Age (SD)</b>       | 66.5<br>(13.3) | 73 (13.3)      | <0.001  | 72.3<br>(13)    | 75.4<br>(13.9) | <0.001     | 69.2<br>(16.8)     | 70.8<br>(17.7) | <0.001     |
| <b>Race %</b>         |                |                |         |                 |                |            |                    |                |            |
| <b>Non-white</b>      | 12.74%         | 14.12%         | 0.015   | 14.25%          | 14.25%         | 0.997      | 15.65%             | 14.70%         | 0.14       |
| <b>White</b>          | 87.26%         | 85.88%         |         | 85.75%          | 85.75%         |            | 84.35%             | 85.30%         |            |
| <b>Comorbidity</b>    |                |                |         |                 |                |            |                    |                |            |
| <b>Arthritis</b>      | 3.37%          | 5.57%          | 0.06    | 4.35%           | 6.95%          | <0.001     | 4.28%              | 7.26%          | <0.001     |
| <b>Asthma</b>         | 2.42%          | 3.89%          | <0.001  | 2.81%           | 5.25%          | <0.001     | 5.09%              | 10.31%         | <0.001     |
| <b>Dementia</b>       | 1.73%          | 3.29%          | <0.001  | 2.65%           | 4.17%          | <0.001     | 6.9%               | 8.52%          | 0.001      |
| <b>Depression</b>     | 4.4%           | 6.8%           | <0.001  | 6.28%           | 9.12%          | <0.001     | 8.64%              | 12.93%         | <0.001     |
| <b>Hypertension</b>   | 57.64%         | 65.69%         | <0.001  | 56.52%          | 62.11%         | <0.001     | 43.91%             | 48.80%         | <0.001     |
| <b>Osteoporosis</b>   | 0.4%           | 4.73%          | <0.001  | 0.97%           | 7.16%          | <0.001     | 2.09%              | 9.00%          | <0.001     |
| <b>Cancer</b>         | 8.14%          | 6.95%          | 0.01    | 13.42%          | 11.91%         | 0.01       | 25.93%             | 17.81%         | <0.001     |
| <b>Drug abuse</b>     | 4.15%          | 1.47%          | <0.001  | 3.65%           | 0.97%          | <0.001     | 4.54%              | 2.36%          | <0.001     |
| <b>Dyslipidemia</b>   | 44.46%         | 40.40%         | <0.001  | 1.06%           | 27.73%         | <0.001     | 20.54%             | 17.71%         | <0.001     |
| <b>CAD</b>            |                |                |         | 56.98%          | 41.27%         | <0.001     | 27.29%             | 17.78%         | <0.001     |
| <b>CHF</b>            | 21.15%         | 29.03%         | <0.001  |                 |                |            | 20.44%             | 21.36%         | 0.20       |
| <b>CKD</b>            | 9.49%          | 9.24%          | 0.60    | 27.93%          | 21.62%         | <0.001     | 15.28%             | 10.71%         | <0.001     |
| <b>COPD</b>           | 11.02%         | 10.84%         | 0.73    | 23.50%          | 16.67%         | <0.001     | 28.19%             | 22.8%          | <0.001     |
| <b>Diabetes</b>       | 26.18%         | 29.62%         | <0.001  | 33.75%          | 32.31%         | 0.09       | 22.78%             | 19.31%         | <0.001     |
| <b>Arrhythmia</b>     | 25.62%         | 27.03%         | 0.06    | 60.93%          | 54.23%         | <0.001     | 28.36%             | 24.80%         | <0.001     |
| <b>Stroke</b>         | 3.35%          | 4.49%          | <0.001  | 2.84%           | 2.42%          | 0.15       | 2.52%              | 1.67%          | 0.001      |
| <b>Length of stay</b> |                |                |         |                 |                |            |                    |                |            |
| <b>Mean (SD)</b>      | 5.42<br>(5.83) | 5.67<br>(5.76) | 0.01    | 6.02<br>(10.22) | 5.71<br>(8.33) | 0.07       | 5.36<br>(6.01)     | 5.13<br>(6.41) | 0.04       |

AA: African American, ADHF: acute decompensated heart failure, AMI: acute myocardial infarction, CAD: Coronary artery disease, CHF: Congestive heart failure, CKD: chronic kidney disease, COPD: Chronic Obstructive Pulmonary Disease, NA: Native American, SD: standard deviation.

**Table 2: Adjusted outcomes**

| Men vs. Women      | AMI                   |         | ADHF                  |         | Pneumonia             |         |
|--------------------|-----------------------|---------|-----------------------|---------|-----------------------|---------|
|                    | Effect size (95% CI)  | P value | OR (95% CI)           | P value | OR (95% CI)           | P value |
| 30 day mortality   | OR: 0.98 (0.86, 1.11) | 0.71    | OR: 0.94 (0.82, 1.07) | 0.39    | OR: 1.19 (1.06, 1.34) | 0.004   |
| 30 day readmission | OR: 0.90 (0.79, 1.04) | 0.16    | OR: 0.90 (0.82, 0.99) | 0.03    | OR: 1.10 (0.99, 1.23) | 0.08    |

ADHF: acute decompensated heart failure, AMI: acute myocardial infarction, LOS: length of stay, OR: odds ratio.

1  
2  
3  
4  
5  
6  
7  
8  
9  
10  
11  
12  
13  
14  
15  
16  
17  
18  
19  
20  
21  
22  
23  
24  
25  
26  
27  
28  
29  
30  
31  
32  
33  
34  
35  
36  
37  
38  
39  
40  
41  
42  
43  
44  
45  
46  
47  
48  
49  
50  
51  
52  
53  
54  
55  
56  
57  
58  
59  
60

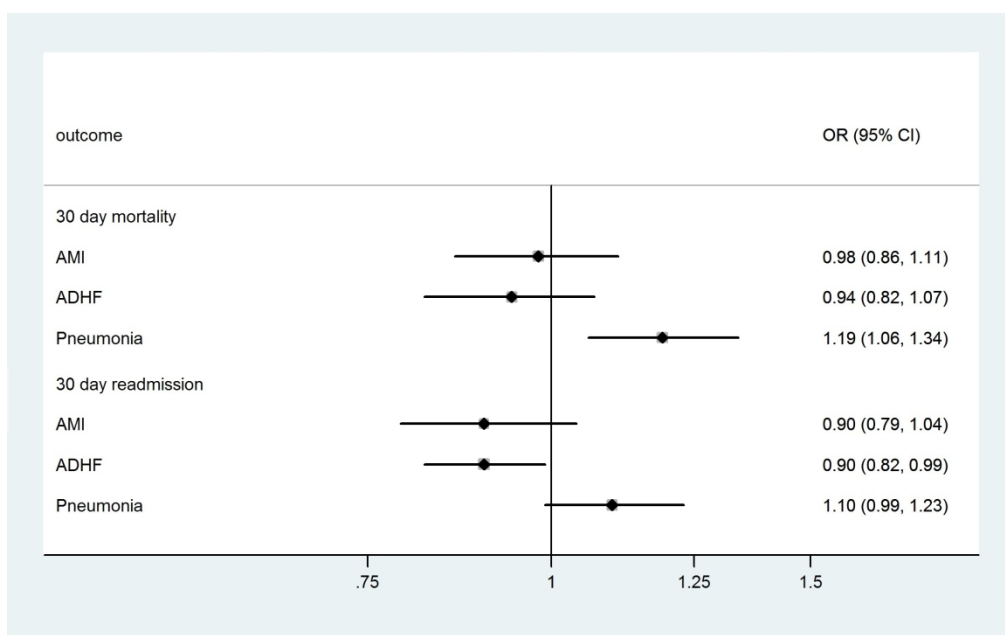

Adjusted outcomes 30 day mortality and 30 day readmission in med vs. women  
633x396mm (96 x 96 DPI)

**Supplementary Table 1: ICD9 codes used in ADHF:**

| ICD-9  | Frequency | %     |
|--------|-----------|-------|
| 428    | 8,665     | 70.65 |
| 428.1  | 97        | 0.79  |
| 428.2  | 7         | 0.06  |
| 428.21 | 305       | 2.49  |
| 428.22 | 99        | 0.81  |
| 428.23 | 1,021     | 8.32  |
| 428.3  | 24        | 0.2   |
| 428.31 | 243       | 1.98  |
| 428.32 | 80        | 0.65  |
| 428.33 | 787       | 6.42  |
| 428.4  | 6         | 0.05  |
| 428.41 | 109       | 0.89  |
| 428.42 | 50        | 0.41  |
| 428.43 | 742       | 6.05  |
| 428.9  | 30        | 0.24  |
| Total  | 12,265    | 100   |

Frequency: Number of patients that were diagnosed based on that code.

#: The percentage of the code out of total number of patients

**Supplementary Table 2: ICD9 codes used in AMI.**

| ICD-9  | Frequency | %     |
|--------|-----------|-------|
| 410    | 3         | 0.02  |
| 410.01 | 536       | 3.4   |
| 410.02 | 2         | 0.01  |
| 410.1  | 34        | 0.22  |
| 410.11 | 2,186     | 13.86 |
| 410.12 | 11        | 0.07  |
| 410.2  | 5         | 0.03  |
| 410.21 | 466       | 2.95  |
| 410.22 | 3         | 0.02  |
| 410.3  | 4         | 0.03  |
| 410.31 | 309       | 1.96  |
| 410.32 | 2         | 0.01  |
| 410.4  | 9         | 0.06  |
| 410.41 | 2,688     | 17.04 |
| 410.42 | 17        | 0.11  |
| 410.5  | 4         | 0.03  |
| 410.51 | 256       | 1.62  |
| 410.52 | 2         | 0.01  |
| 410.6  | 1         | 0.01  |
| 410.61 | 75        | 0.48  |
| 410.7  | 25        | 0.16  |
| 410.71 | 8,345     | 52.89 |
| 410.72 | 58        | 0.37  |
| 410.8  | 6         | 0.04  |
| 410.81 | 331       | 2.1   |
| 410.82 | 2         | 0.01  |
| 410.9  | 7         | 0.04  |
| 410.91 | 389       | 2.47  |
| 410.92 | 1         | 0.01  |
| Total  | 15,777    | 100   |

Frequency: Number of patients that were diagnosed based on that code.

#: The percentage of the code out of total number of patients

**Supplementary Table 3: ICD9 codes used in pneumonia:**

| ICD-9  | Frequency | %    |
|--------|-----------|------|
| 11.6   | 1         | 0.01 |
| 11.64  | 1         | 0.01 |
| 52.1   | 10        | 0.08 |
| 73     | 2         | 0.02 |
| 115.05 | 68        | 0.53 |
| 115.95 | 29        | 0.22 |
| 480    | 1         | 0.01 |
| 480.1  | 67        | 0.52 |
| 480.2  | 1         | 0.01 |
| 480.3  | 1         | 0.01 |
| 480.8  | 12        | 0.09 |
| 480.9  | 57        | 0.44 |
| 481    | 431       | 3.33 |
| 482    | 68        | 0.53 |
| 482.1  | 208       | 1.61 |
| 482.2  | 163       | 1.26 |
| 482.3  | 57        | 0.44 |
| 482.31 | 11        | 0.09 |
| 482.32 | 6         | 0.05 |
| 482.39 | 15        | 0.12 |
| 482.4  | 66        | 0.51 |
| 482.41 | 140       | 1.08 |
| 482.42 | 57        | 0.44 |
| 482.49 | 2         | 0.02 |
| 482.81 | 8         | 0.06 |
| 482.82 | 33        | 0.26 |
| 482.83 | 118       | 0.91 |
| 482.84 | 46        | 0.36 |
| 482.89 | 42        | 0.32 |
| 482.9  | 143       | 1.11 |
| 483    | 25        | 0.19 |
| 483.8  | 5         | 0.04 |
| 484.1  | 3         | 0.02 |
| 484.6  | 1         | 0.01 |
| 485    | 104       | 0.8  |
| 486    | 8,520     | 65.9 |
| 487    | 234       | 1.81 |
| 495.8  | 4         | 0.03 |
| 495.9  | 62        | 0.48 |
| 506    | 12        | 0.09 |
| 507    | 2,081     | 16.1 |
| 507.1  | 6         | 0.05 |
| 507.8  | 2         | 0.02 |
| 997.32 | 6         | 0.05 |
| Total  | 12,929    | 100  |

Frequency: Number of patients that were diagnosed based on that code.

%: The percentage of the code out of total number of patients

**Supplementary Table 4: Comorbidities specified by OASH.**

|              |                          |            |               |
|--------------|--------------------------|------------|---------------|
| Dyslipidemia | Coronary Artery Disease  | Depression | COPD          |
| Arthritis    | Substance abuse          | Diabetes   | Dementia      |
| Osteoporosis | Congestive Heart Failure | Cancer     | Schizophrenia |
| Autism       | Chronic Kidney Disease   | Arrhythmia | Hepatitis     |
| Hypertension | Stroke                   | Asthma     | HIV           |



**Supplementary Table 5: List of ICD-9 codes used for the comorbidities:**

| The condition           | ICD-9 codes used:                                                                                                                                                                                                                                                                                                                                                                                                                                                                                                                                                                                                                                                                                                              |
|-------------------------|--------------------------------------------------------------------------------------------------------------------------------------------------------------------------------------------------------------------------------------------------------------------------------------------------------------------------------------------------------------------------------------------------------------------------------------------------------------------------------------------------------------------------------------------------------------------------------------------------------------------------------------------------------------------------------------------------------------------------------|
| Dyslipidemia            | 272.0, 272.1, 272.2, 272.3, 272.4                                                                                                                                                                                                                                                                                                                                                                                                                                                                                                                                                                                                                                                                                              |
| Arthritis               | 714.0, 714.1, 714.2, 714.30, 714.31, 714.32, 714.33, 715.00, 715.04, 715.09, 715.10, 715.11, 715.12, 715.13, 715.14, 715.15, 715.16, 715.17, 715.18, 715.20, 715.21, 715.22, 715.23, 715.24, 715.25, 715.26, 715.27, 715.28, 715.30, 715.31, 715.32, 715.33, 715.34, 715.35, 715.36, 715.37, 715.38, 715.80, 715.89, 715.90, 715.91, 715.92, 715.93, 715.94, 715.95, 715.96, 715.97, 715.98, 720.0, 721.0, 721.1, 721.2, 721.3, 721.90, 721.91                                                                                                                                                                                                                                                                                 |
| Osteoporosis            | 733.00, 733.01, 733.02, 733.03, 733.09                                                                                                                                                                                                                                                                                                                                                                                                                                                                                                                                                                                                                                                                                         |
| Hypertension            | 401.0, 401.1, 401.9, 402.00, 402.01, 402.10, 402.11, 402.90, 402.91, 403.00, 403.01, 403.10, 403.11, 403.90, 403.91, 404.00, 404.01, 404.02, 404.03, 404.10, 404.11, 404.12, 404.13, 404.90, 404.91, 404.92, 404.93, 405.01, 405.09, 405.11, 405.19, 405.91, 405.99, 362.11, 437.2                                                                                                                                                                                                                                                                                                                                                                                                                                             |
| Coronary Artery Disease | 410.00, 410.01, 410.02, 410.10, 410.11, 410.12, 410.20, 410.21, 410.22, 410.30, 410.31, 410.32, 410.40, 410.41, 410.42, 410.50, 410.51, 410.52, 410.60, 410.61, 410.62, 410.70, 410.71, 410.72, 410.80, 410.81, 410.82, 410.90, 410.91, 410.92, 411.0, 411.1, 411.81, 411.89, 412, 413.0, 413.1, 413.9, 414.00, 414.01, 414.02, 414.03, 414.04, 414.05, 414.06, 414.07, 414.12, 414.2, 414.3, 414.8, 414.9                                                                                                                                                                                                                                                                                                                     |
| COPD                    | 490, 491.0, 491.1, 491.20, 491.21, 491.22, 491.8, 491.9, 492.0, 492.8, 494.0, 494.1, 496                                                                                                                                                                                                                                                                                                                                                                                                                                                                                                                                                                                                                                       |
| Chronic Kidney Disease  | 016.00, 016.01, 016.02, 016.03, 016.04, 016.05, 016.06, 095.4, 189.0, 189.9, 223.0, 236.91, 249.40, 249.41, 250.40, 250.41, 250.42, 250.43, 271.4, 274.10, 283.11, 403.01, 403.11, 403.91, 404.02, 404.03, 404.12, 404.13, 404.92, 404.93, 440.1, 442.1, 572.4, 580.0, 580.4, 580.81, 580.89, 580.9, 581.0, 581.1, 581.2, 581.3, 581.81, 581.89, 581.9, 582.0, 582.1, 582.2, 582.4, 582.81, 582.89, 582.9, 583.0, 583.1, 583.2, 583.4, 583.6, 583.7, 583.81, 583.89, 583.9, 584.5, 584.6, 584.7, 584.8, 584.9, 585, 585.1, 585.2, 585.3, 585.4, 585.5, 585.6, 585.9, 586, 587, 588.0, 588.1, 588.81, 588.89, 588.9, 591, 753.12, 753.13, 753.14, 753.15, 753.16, 753.17, 753.19, 753.20, 753.21, 753.22, 753.23, 753.29, 794.4 |
| Stroke                  | 430, 431, 433.01, 433.11, 433.21, 433.31, 433.81, 433.91, 434.00, 434.01, 434.10, 434.11, 434.90, 434.91, 435.0, 435.1, 435.3, 435.8, 435.9, 436, 997.02                                                                                                                                                                                                                                                                                                                                                                                                                                                                                                                                                                       |
| Depression              | 296.20, 296.21, 296.22, 296.23, 296.24, 296.25, 296.26, 296.30, 296.31, 296.32, 296.33, 296.34, 296.35, 296.36, 296.51, 296.52, 296.53, 296.54, 296.55, 296.56, 296.60, 296.61, 296.62, 296.63, 296.64, 296.65, 296.66, 296.89, 298.0, 300.4, 309.1, 311                                                                                                                                                                                                                                                                                                                                                                                                                                                                       |
| Diabetes                | 249.00, 249.01, 249.10, 249.11, 249.20, 249.21, 249.30, 249.31, 249.40, 249.41, 249.50, 249.51, 249.60, 249.61, 249.70, 249.71, 249.80, 249.81, 249.90, 249.91, 250.00, 250.01, 250.02, 250.03,                                                                                                                                                                                                                                                                                                                                                                                                                                                                                                                                |

|                          |                                                                                                                                                                                                                                                                                                                                                                   |
|--------------------------|-------------------------------------------------------------------------------------------------------------------------------------------------------------------------------------------------------------------------------------------------------------------------------------------------------------------------------------------------------------------|
|                          | 250.10, 250.11, 250.12, 250.13, 250.20, 250.21, 250.22, 250.23, 250.30, 250.31, 250.32, 250.33, 250.40, 250.41, 250.42, 250.43, 250.50, 250.51, 250.52, 250.53, 250.60, 250.61, 250.62, 250.63, 250.70, 250.71, 250.72, 250.73, 250.80, 250.81, 250.82, 250.83, 250.90, 250.91, 250.92, 250.93, 357.2, 362.01, 362.02, 366.41                                     |
| Cancer                   | Female breast cancer: 174.0, 174.1, 174.2, 174.3, 174.4, 174.5, 174.6, 174.8, 174.9, 175.0, 175.9, 233.0, V10.3.<br>Colorectal cancer: 154.0, 154.1, 153.0, 153.1, 153.2, 153.3, 153.4, 153.5, 153.6, 153.7, 153.8, 153.9, 230.3, 230.4, V10.05.<br>Prostate cancer: 185, 233.4, V10.46.<br>Lung cancer: 162.2, 162.3, 162.4, 162.5, 162.8, 162.9, 231.2, V10.11. |
| Arrhythmia               | 427.31                                                                                                                                                                                                                                                                                                                                                            |
| Asthma                   | 493.00, 493.01, 493.02, 493.10, 493.11, 493.12, 493.20, 493.21, 493.22, 493.81, 493.82, 493.90, 493.91, 493.92                                                                                                                                                                                                                                                    |
| Congestive Heart Failure | 398.91, 402.01, 402.11, 402.91, 404.01, 404.11, 404.91, 404.03, 404.13, 404.93, 428.0, 428.1, 428.20, 428.21, 428.22, 428.23, 428.30, 428.31, 428.32, 428.33, 428.40, 428.41, 428.42, 428.43, 428.9                                                                                                                                                               |
| Dementia                 | 331.0, 331.1, 331.11, 331.19, 331.2, 331.7, 290.0, 290.10, 290.11, 290.12, 290.13, 290.20, 290.21, 290.3, 290.40, 290.41, 290.42, 290.43, 294.0, 294.10, 294.11, 294.8, 797                                                                                                                                                                                       |

**Supplementary Table 6: sensitivity analysis for the last 5 years of the study**

| <b>Last 5 years</b>       | <b>AMI</b>          | <b>ADHF</b>         | <b>Pneumonia</b>    |
|---------------------------|---------------------|---------------------|---------------------|
| <b>Men vs. Women</b>      | <b>OR (95% CI)</b>  | <b>OR (95% CI)</b>  | <b>OR (95% CI)</b>  |
| <b>30 day mortality</b>   | 1.02 (0.73 to 1.43) | 0.81 (0.62 to 1.06) | 1.12 (0.85 to 1.47) |
| <b>30 day readmission</b> | 0.85 (0.63 to 1.15) | 0.78 (0.63 to 0.97) | 0.94 (0.74 to 1.20) |

For peer review only

**Supplementary Table 7: sensitivity analysis for 15 day mortality and readmission**

| <b>Last 5 years</b>       | <b>AMI</b>          | <b>ADHF</b>         | <b>Pneumonia</b>    |
|---------------------------|---------------------|---------------------|---------------------|
| <b>Men vs. Women</b>      | <b>OR (95% CI)</b>  | <b>OR (95% CI)</b>  | <b>OR (95% CI)</b>  |
| <b>15 day mortality</b>   | 1.00 (0.88 to 1.15) | 0.88 (0.73 to 1.05) | 1.15 (1.00 to 1.33) |
| <b>15 day readmission</b> | 0.91 (0.81 to 1.03) | 0.93 (0.81 to 1.06) | 1.10 (0.96 to 1.27) |

For peer review only

Supplementary Figure 1: 30 day mortality in AMI

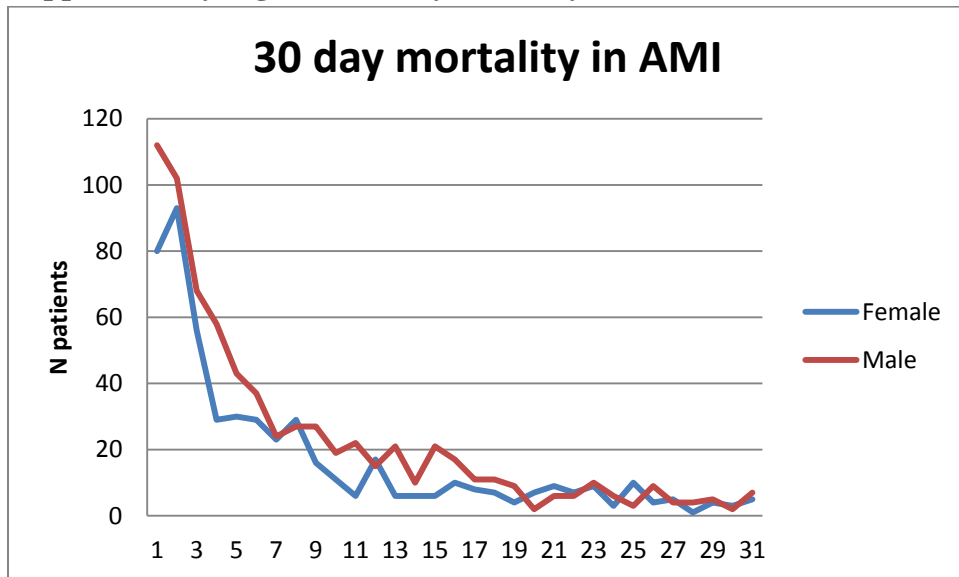

Peer review only

1  
2  
3  
4  
5  
6  
7  
8  
9  
10  
11  
12  
13  
14  
15  
16  
17  
18  
19  
20  
21  
22  
23  
24  
25  
26  
27  
28  
29  
30  
31  
32  
33  
34  
35  
36  
37  
38  
39  
40  
41  
42  
43  
44  
45  
46  
47  
48  
49  
50  
51  
52  
53  
54  
55  
56  
57  
58  
59  
60

Supplementary Figure 2: 30 day mortality in ADHF

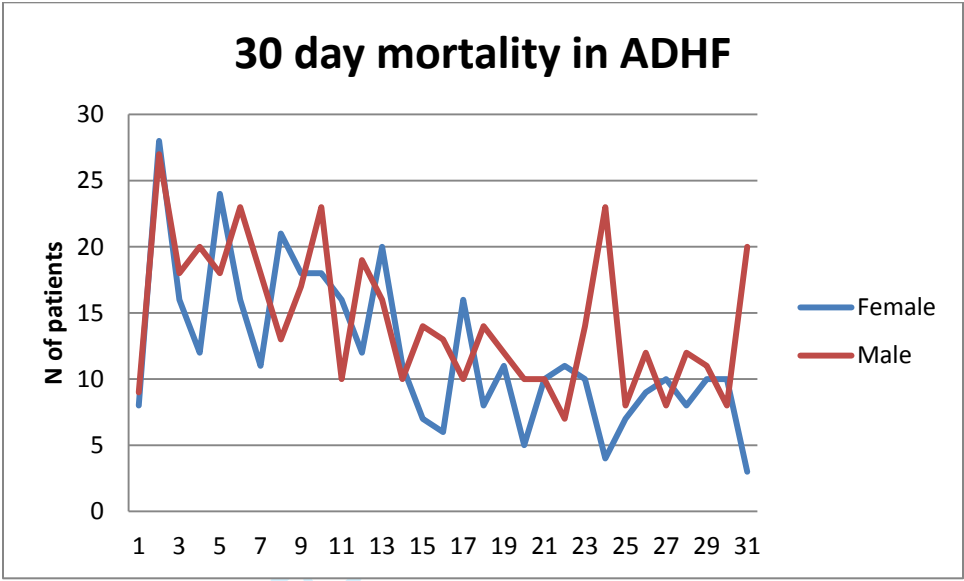

Peer review only

Supplementary Figure 3: 30 day mortality in pneumonia

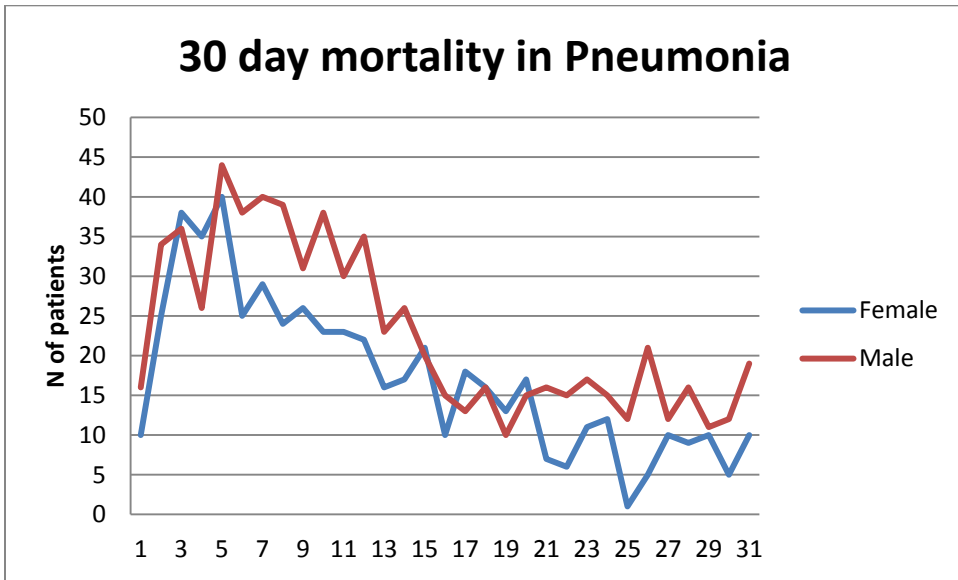

1  
2  
3  
4  
5  
6  
7  
8  
9  
10  
11  
12  
13  
14  
15  
16  
17  
18  
19  
20  
21  
22  
23  
24  
25  
26  
27  
28  
29  
30  
31  
32  
33  
34  
35  
36  
37  
38  
39  
40  
41  
42  
43  
44  
45  
46  
47  
48  
49  
50  
51  
52  
53  
54  
55  
56  
57  
58  
59  
60

Supplementary Figure 4: 30 day readmission in AMI

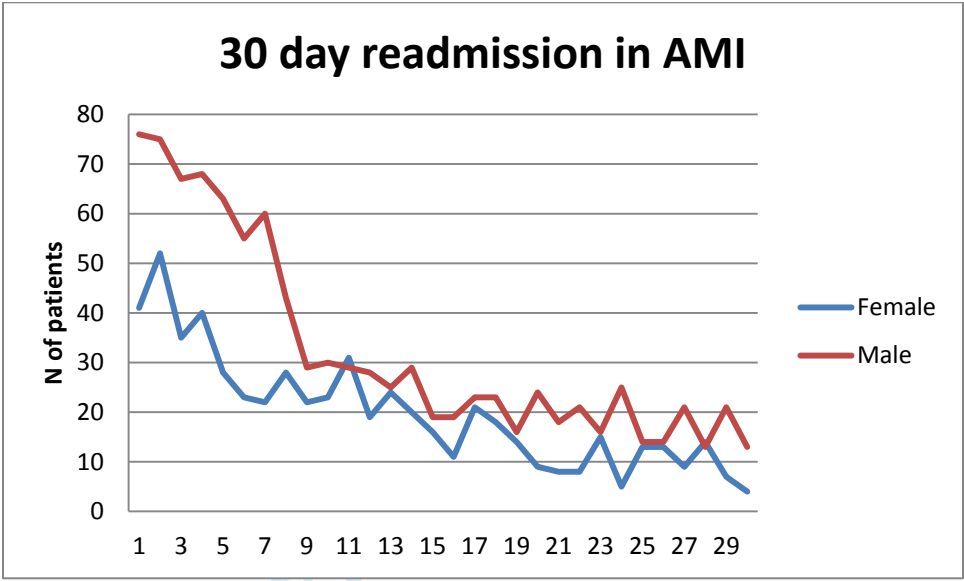

Peer review only



Supplementary Figure 5: 30 day readmission in ADHF

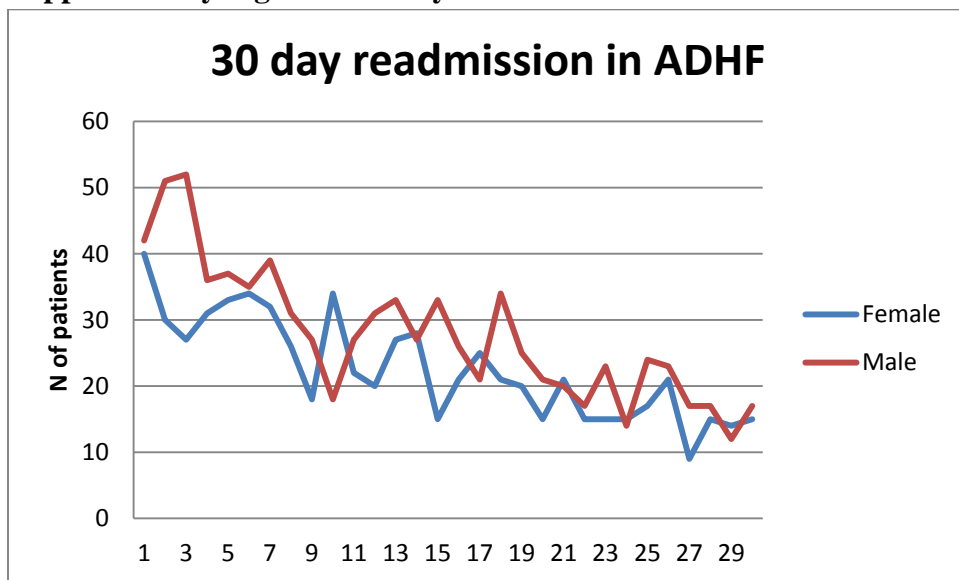

1  
2  
3  
4  
5  
6  
7  
8  
9  
10  
11  
12  
13  
14  
15  
16  
17  
18  
19  
20  
21  
22  
23  
24  
25  
26  
27  
28  
29  
30  
31  
32  
33  
34  
35  
36  
37  
38  
39  
40  
41  
42  
43  
44  
45  
46  
47  
48  
49  
50  
51  
52  
53  
54  
55  
56  
57  
58  
59  
60

Supplementary Figure 6: 30 day readmission in pneumonia

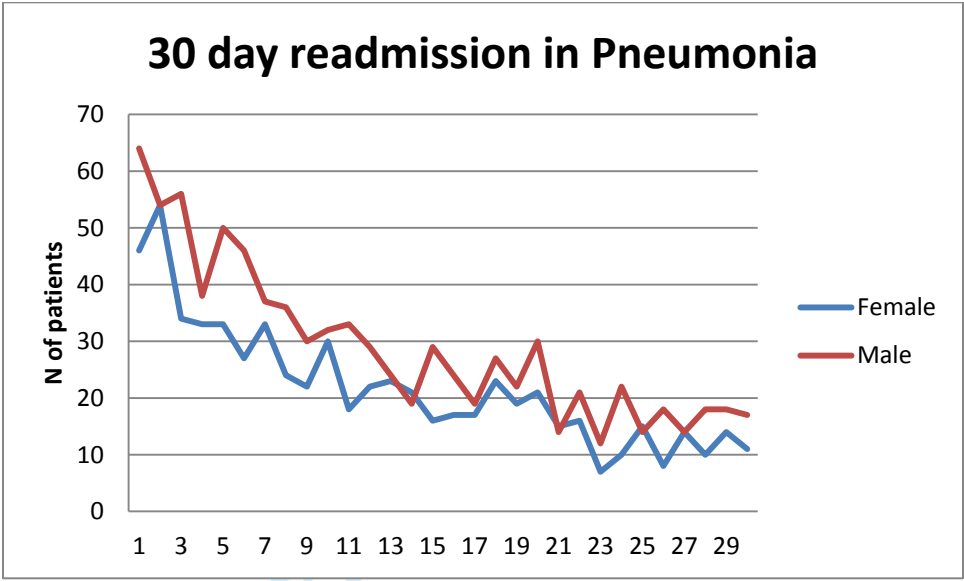

## STROBE Statement—checklist of items that should be included in reports of observational studies

|                              | Item No | Recommendation                                                                                                                                                                             | Page number |
|------------------------------|---------|--------------------------------------------------------------------------------------------------------------------------------------------------------------------------------------------|-------------|
| <b>Title and abstract</b>    | 1       | (a) Indicate the study's design with a commonly used term in the title or the abstract                                                                                                     | 1           |
|                              |         | (b) Provide in the abstract an informative and balanced summary of what was done and what was found                                                                                        | 2           |
| <b>Introduction</b>          |         |                                                                                                                                                                                            |             |
| Background/rationale         | 2       | Explain the scientific background and rationale for the investigation being reported                                                                                                       | 4           |
| Objectives                   | 3       | State specific objectives, including any prespecified hypotheses                                                                                                                           | 5           |
| <b>Methods</b>               |         |                                                                                                                                                                                            |             |
| Study design                 | 4       | Present key elements of study design early in the paper                                                                                                                                    | 7           |
| Setting                      | 5       | Describe the setting, locations, and relevant dates, including periods of recruitment, exposure, follow-up, and data collection                                                            | 7           |
| Participants                 | 6       | (a) <i>Cohort study</i> —Give the eligibility criteria, and the sources and methods of selection of participants. Describe methods of follow-up                                            | 7           |
|                              |         | <i>Case-control study</i> —Give the eligibility criteria, and the sources and methods of case ascertainment and control selection. Give the rationale for the choice of cases and controls |             |
|                              |         | <i>Cross-sectional study</i> —Give the eligibility criteria, and the sources and methods of selection of participants                                                                      |             |
|                              |         | (b) <i>Cohort study</i> —For matched studies, give matching criteria and number of exposed and unexposed                                                                                   |             |
|                              |         | <i>Case-control study</i> —For matched studies, give matching criteria and the number of controls per case                                                                                 |             |
| Variables                    | 7       | Clearly define all outcomes, exposures, predictors, potential confounders, and effect modifiers. Give diagnostic criteria, if applicable                                                   | 8           |
| Data sources/<br>measurement | 8*      | For each variable of interest, give sources of data and details of methods of assessment (measurement). Describe comparability of assessment methods if there is more than one group       | 8           |
| Bias                         | 9       | Describe any efforts to address potential sources of bias                                                                                                                                  | 8           |
| Study size                   | 10      | Explain how the study size was arrived at                                                                                                                                                  | 8           |
| Quantitative variables       | 11      | Explain how quantitative variables were handled in the analyses. If applicable, describe which groupings were chosen and why                                                               |             |
| Statistical methods          | 12      | (a) Describe all statistical methods, including those used to control for confounding                                                                                                      | 8           |
|                              |         | (b) Describe any methods used to examine subgroups and interactions                                                                                                                        |             |
|                              |         | (c) Explain how missing data were addressed                                                                                                                                                |             |
|                              |         | (d) <i>Cohort study</i> —If applicable, explain how loss to follow-up was addressed                                                                                                        |             |
|                              |         | <i>Case-control study</i> —If applicable, explain how matching of cases and controls was addressed                                                                                         |             |
|                              |         | <i>Cross-sectional study</i> —If applicable, describe analytical methods taking account of sampling strategy                                                                               |             |
|                              |         | (e) Describe any sensitivity analyses                                                                                                                                                      |             |

Continued on next page

| <b>Results</b>           |                                                                                                                                                                                                                                                                                                                                                                                                                  | <b>Page number</b> |
|--------------------------|------------------------------------------------------------------------------------------------------------------------------------------------------------------------------------------------------------------------------------------------------------------------------------------------------------------------------------------------------------------------------------------------------------------|--------------------|
| Participants             | 13* (a) Report numbers of individuals at each stage of study—eg numbers potentially eligible, examined for eligibility, confirmed eligible, included in the study, completing follow-up, and analysed<br>(b) Give reasons for non-participation at each stage<br>(c) Consider use of a flow diagram                                                                                                              | 9                  |
| Descriptive data         | 14* (a) Give characteristics of study participants (eg demographic, clinical, social) and information on exposures and potential confounders<br>(b) Indicate number of participants with missing data for each variable of interest<br>(c) <i>Cohort study</i> —Summarise follow-up time (eg, average and total amount)                                                                                          | 9                  |
| Outcome data             | 15* <i>Cohort study</i> —Report numbers of outcome events or summary measures over time<br><i>Case-control study</i> —Report numbers in each exposure category, or summary measures of exposure<br><i>Cross-sectional study</i> —Report numbers of outcome events or summary measures                                                                                                                            | 9-11               |
| Main results             | 16 (a) Give unadjusted estimates and, if applicable, confounder-adjusted estimates and their precision (eg, 95% confidence interval). Make clear which confounders were adjusted for and why they were included<br>(b) Report category boundaries when continuous variables were categorized<br>(c) If relevant, consider translating estimates of relative risk into absolute risk for a meaningful time period | 9-11               |
| Other analyses           | 17 Report other analyses done—eg analyses of subgroups and interactions, and sensitivity analyses                                                                                                                                                                                                                                                                                                                | 10-11              |
| <b>Discussion</b>        |                                                                                                                                                                                                                                                                                                                                                                                                                  |                    |
| Key results              | 18 Summarise key results with reference to study objectives                                                                                                                                                                                                                                                                                                                                                      | 11-12              |
| Limitations              | 19 Discuss limitations of the study, taking into account sources of potential bias or imprecision. Discuss both direction and magnitude of any potential bias                                                                                                                                                                                                                                                    | 12-13              |
| Interpretation           | 20 Give a cautious overall interpretation of results considering objectives, limitations, multiplicity of analyses, results from similar studies, and other relevant evidence                                                                                                                                                                                                                                    | 13                 |
| Generalisability         | 21 Discuss the generalisability (external validity) of the study results                                                                                                                                                                                                                                                                                                                                         | 13                 |
| <b>Other information</b> |                                                                                                                                                                                                                                                                                                                                                                                                                  |                    |
| Funding                  | 22 Give the source of funding and the role of the funders for the present study and, if applicable, for the original study on which the present article is based                                                                                                                                                                                                                                                 | 14                 |

\*Give information separately for cases and controls in case-control studies and, if applicable, for exposed and unexposed groups in cohort and cross-sectional studies.

**Note:** An Explanation and Elaboration article discusses each checklist item and gives methodological background and published examples of transparent reporting. The STROBE checklist is best used in conjunction with this article (freely available on the Web sites of PLoS Medicine at <http://www.plosmedicine.org/>, Annals of Internal Medicine at <http://www.annals.org/>, and Epidemiology at <http://www.epidem.com/>). Information on the STROBE Initiative is available at [www.strobe-statement.org](http://www.strobe-statement.org).

# BMJ Open

## Gender disparities among hospitalized patients with acute myocardial infarction, acute decompensated heart failure, or pneumonia: a retrospective cohort study

|                                 |                                                                                                                                                                  |
|---------------------------------|------------------------------------------------------------------------------------------------------------------------------------------------------------------|
| Journal:                        | <i>BMJ Open</i>                                                                                                                                                  |
| Manuscript ID                   | bmjopen-2018-022782.R2                                                                                                                                           |
| Article Type:                   | Research                                                                                                                                                         |
| Date Submitted by the Author:   | 19-Nov-2018                                                                                                                                                      |
| Complete List of Authors:       | alsawas, mouaz; Mayo Clinic, Wang, Zhen; Mayo Clinic, Murad, M. Hassan; Mayo Clinic Yousufuddin, Mohammed; Mayo Clinic Health System, Hospital Internal Medicine |
| <b>Primary Subject Heading</b>: | Health services research                                                                                                                                         |
| Secondary Subject Heading:      | Medical management                                                                                                                                               |
| Keywords:                       | INTERNAL MEDICINE, CARDIOLOGY, Respiratory infections < THORACIC MEDICINE                                                                                        |
|                                 |                                                                                                                                                                  |

SCHOLARONE™  
Manuscripts

1  
2  
3 Gender disparities among hospitalized patients with acute myocardial  
4 infarction, acute decompensated heart failure, or pneumonia: a retrospective  
5 cohort study  
6  
7

8  
9 Mouaz Alsawas\*, M.D., M.Sc.<sup>1</sup>; Zhen Wang, Ph.D<sup>1</sup>; M. Hassan Murad,  
10 M.D, M.P.H<sup>1</sup>; Mohammed Yousufuddin, M.D, M.Sc<sup>2</sup>.  
11  
12  
13  
14  
15  
16

17 <sup>1</sup>Evidence-based Practice Center, Mayo Clinic Robert D. and Patricia E. Kern Center for the  
18 Science of Health Care Delivery, Mayo Clinic, Rochester, MN.  
19

20 <sup>2</sup>Department of Hospital Internal Medicine, Mayo Clinic Health System, Austin, Minnesota  
21

22 \* Corresponding author:  
23

24 Mouaz Alsawas, M.D., M.Sc

25 200 First Street SW

26 Rochester, MN 55902

27 Phone: (507)266-2441

28 Fax: 507 284 1731

29 Email: Alsawas.Mouaz@mayo.edu  
30  
31  
32  
33  
34  
35  
36  
37  
38  
39  
40  
41  
42  
43  
44  
45  
46  
47  
48  
49  
50  
51  
52  
53  
54  
55  
56  
57  
58  
59  
60

**Abstract:**

**Objective:** To assess gender disparity in outcomes among hospitalized patients with acute myocardial infarction (AMI), acute decompensated heart failure (ADHF), or pneumonia.

**Design:** A retrospective cohort study.

**Setting:** A tertiary referral center in Midwest, USA.

**Participants:** We evaluated 12,265 adult patients hospitalized with ADHF, 15,777 with AMI and 12,929 with pneumonia, from January 1, 1995 through August 31, 2015.

Patients were selected using ICD-9 codes.

**Primary and secondary outcome measures:** Prevalence of comorbidities, 30 day mortality, and 30 day readmission. Comorbidities were chosen from the twenty chronic conditions, specified by the Office of the Assistant Secretary for Health. Logistic regression analysis was conducted adjusting for multiple confounders.

**Results:** Prevalence of comorbidities was significantly different between men and women in all 3 conditions. After adjusting for age, length of stay, multi-comorbidities, and residence, there was no significant difference in 30 day mortality between men and women in AMI or ADHF, but men with pneumonia had slightly higher 30 day mortality with an odds ratio (OR) of 1.19 (95% CI 1.06 to 1.34). There was no significant difference in 30 day readmission between men and women with AMI or pneumonia, but women with ADHF were slightly more likely to be readmitted within 30 days with OR 0.90 (95% CI 0.82 to 0.99).

**Conclusion:** Gender differences in the distribution of comorbidities exist in patients hospitalized with AMI, ADHF, and pneumonia. However, there is minimal clinically

1  
2  
3 meaningful impact of these differences on outcomes. Efforts to address gender difference  
4  
5 may need to be diverted towards targeting overall population health, reducing  
6  
7 race/ethnicity disparity, and improving access to care.  
8  
9  
10  
11  
12  
13  
14  
15  
16  
17  
18  
19  
20  
21  
22  
23  
24  
25  
26  
27  
28  
29  
30  
31  
32  
33  
34  
35  
36  
37  
38  
39  
40  
41  
42  
43  
44  
45  
46  
47  
48  
49  
50  
51  
52  
53  
54  
55  
56  
57  
58  
59  
60

For peer review only



## Article summary:

### Strengths and limitations of this study:

- The strengths of this study include the large sample size, multivariable adjustment and sensitivity analyses to assess robustness of findings.
- A limitation of this study is including all patients that were hospitalized in a single regional tertiary center; these patients were from several different states and some from were from other countries. We might have under estimated the mortality or readmission rates if these patients were readmitted to a different hospital closer to their residency place after discharge.
- A limitation of this study is that the majority of the included patients were white; the results may not be generalizable to people from other races.

## Introduction:

Acute decompensated heart failure (ADHF), acute myocardial infarction (AMI), and pneumonia are among the most common causes of hospitalization in the United States, with more than 2.5 million hospitalizations per year, and estimated annual hospital cost of \$31.3 billion.<sup>1,2</sup> Hospitalized patients with ADHF, AMI, or pneumonia are at high risk of death and readmission at 30 days after index hospitalization.<sup>1,2</sup> In the United States, 15.1% of patients with acute myocardial infarction (AMI), 11.4% of patients with ADHF, and 11.3% patients with pneumonia die within 30 days after hospitalization for respective disorders.<sup>3,4</sup> Likewise, 21.4%, 16% and 16.5% of patients hospitalized for ADHF, AMI, and pneumonia respectively are readmitted within 30 days of the first hospitalization.<sup>5</sup> Annually, the Centers for Medicare & Medicaid Services (CMS) publically reports a comprehensive overview of national performance as part of the Hospital Inpatient Quality Reporting (IQR) Program, using these three conditions.<sup>1,2</sup> Risk standardized 30-day mortality and readmission rates are quality performance measures for AMI, ADHF, and pneumonia.<sup>6</sup> However, these outcomes vary between males and females.<sup>7</sup>

In the past several decades, gender disparities in clinical outcomes of hospitalized patients with different diseases have been investigated.<sup>8,9</sup> Several studies suggested gender differences in clinical outcomes for patients with AMI, ADHF and Pneumonia.<sup>10-</sup>

13

Females have worse outcomes for pneumonia than males, with adjusted risk ratio of 1.15 for 28 days mortality.<sup>14</sup> Women with acute coronary syndromes were at a higher risk for unadjusted in-hospital death (5.6% vs. 4.3%)<sup>9</sup> and they are more likely to have adverse

1  
2  
3 outcomes (myocardial infarction, stroke and readmission) compared to men (odds ratio  
4  
5 1.24, 95% CI 1.14 to 1.34).<sup>15</sup>  
6

7  
8 Although no gender differences were found in outcomes in patients with ADHF, there  
9  
10 were significant gender differences in the clinical characteristics at presentation including  
11  
12 age and comorbidities.<sup>10</sup>  
13

14  
15 Multimorbidity, defined as existence of two or more disorders in an individual patient,  
16  
17 has become a public health issue of increasing magnitude. Around one third of all  
18  
19 Americans have multimorbidity (31.5%), and the rate is expected to increase with time.<sup>16</sup>  
20

21  
22 Multimorbidity is associated with premature death, propensity for over investigation,  
23  
24 duplicate tests, medication non-adherence, polypharmacy with increased risk for drug  
25  
26 adverse events, and a decline in functional status.<sup>16</sup> Mutlimorbidity itself may have  
27  
28 gender disparities. The US National Health and Nutrition Examination Survey  
29  
30 (NHANES) when looking at persons 65 years and older found that 83% of women  
31  
32 compared to 65% men with coronary artery disease had one of the four comorbid  
33  
34 conditions (arthritis, chronic lower respiratory tract disease , diabetes mellitus, and  
35  
36 stroke).<sup>17</sup> European data suggest a similar difference in prevalence of multimorbidity  
37  
38 between men and women.<sup>18</sup>  
39  
40  
41

42  
43 Although the above data provide sex-related differences in the prevalence of  
44  
45 multimorbidity in specific patient population, the disparity in rates of occurrence of  
46  
47 comorbid conditions and their impact on early clinical outcome have not been reported  
48  
49 by gender for broader hospitalized patients with ADHF, AMI, and pneumonia.  
50

51  
52 To address this gap in knowledge, we evaluated gender-specific differences in prevalence  
53  
54 of individual and multiple comorbid conditions in a large hospital-based patient  
55  
56  
57  
58  
59  
60

1  
2  
3 population with ADHF, AMI, and pneumonia. Furthermore, we determined whether the  
4  
5 presence of individual or multimorbidity impacts 30-day mortality or readmission by  
6  
7 gender independent of demographic and social characteristics.  
8  
9  
10  
11  
12  
13  
14  
15  
16  
17  
18  
19  
20  
21  
22  
23  
24  
25  
26  
27  
28  
29  
30  
31  
32  
33  
34  
35  
36  
37  
38  
39  
40  
41  
42  
43  
44  
45  
46  
47  
48  
49  
50  
51  
52  
53  
54  
55  
56  
57  
58  
59  
60

For peer review only

## Methods:

### Study design and Population sample:

This is a retrospective study of patients aged  $\geq 18$  years hospitalized for ADHF, AMI, and pneumonia at Mayo Clinic, Rochester, Minnesota, from January 1, 1995 to August 31, 2015.

We included first hospitalization in the analysis when a patient had multiple repeat hospitalizations for the same condition, since patients with multiple hospitalizations with the same condition may have higher risk of readmission or mortality within 30 days. The data were extracted by dedicated abstraction personnel using International Classification of Diseases, Ninth Revision, Clinical Modification (ICD-9-CM) codes (supplementary tables 1-3). We abstracted data-related to age, gender, race, zip code, insurance, principal discharge diagnosis, secondary diagnoses, length of hospital stay, death, and readmission by date. The diagnoses of AMI, ADHF, and pneumonia were based on physician provider as documented in clinical notes. Patients who refused participation in clinical research were excluded. The study was approved by the Mayo Clinic Institutional Review Board.

**Patient and Public Involvement:** patients and public were not involved.

### Measure of multi-comorbidities:

Comorbidities were chosen from twenty chronic conditions (Supplementary Table 4) specified by the Office of the Assistant Secretary for Health (OASH)<sup>19</sup> using ICD-9-CM codes (Supplementary table 5). Multi-comorbidities were categorized into four groups based on the number of existing chronic conditions: less than 2 comorbidities, 2 comorbidities, 3 comorbidities, and 4 or more comorbidities.

1  
2  
3 We did not use composite morbidity index such as Charlson, since it needed to be  
4 modified for this study. For example, we did not count coronary artery disease (CAD) as  
5 one of the comorbidities for patients hospitalized for AMI, the same for congestive heart  
6 failure for patients with ADHF.  
7  
8  
9  
10  
11

12 We excluded 4-comorbid conditions (autism, schizophrenia, hepatitis, and HIV) from the  
13 analysis because of very low frequency of occurrence (<1%).  
14  
15  
16

### 17 **Measures of outcomes:**

18  
19  
20 The primary outcomes were prevalence of comorbidities in men and women, 30 day  
21 mortality, defined as 30 days from the day of admission with one of the primary  
22 diagnosis, and 30 day readmission for any cause since discharge date.  
23  
24  
25  
26  
27

### 28 **Statistical analysis:**

29  
30 Baseline characteristic data were summarized as mean and standard deviation for  
31 continuous variables and as for categorical variables. Prevalence of comorbidities and the  
32 number of multi-morbidities in men and women were compared using Chi<sup>2</sup> tests.  
33  
34  
35  
36

37 Gender differences in 30 day mortality and 30 day readmission were presented as odds  
38 ratio. Logistic regression models were developed to estimate the risk of outcomes of  
39 interest while controlling for various confounders (age, length of stay, Olmsted county  
40 residency, and number of comorbidities). Results are reported as odds ratios and 95%  
41 confidence intervals (CI). A two-tailed P value <0.05 was considered as statistically  
42 significant and all analyses were performed using STATA 14.0 (StataCorp, College  
43 Station, Texas).  
44  
45  
46  
47  
48  
49  
50  
51  
52  
53  
54  
55  
56  
57  
58  
59  
60

## Results:

40,971 patients were included during the study period, 12,265 with ADHF, 15,777 with AMI, and 12,929 with pneumonia. There were more men in all three conditions, and men were younger. (Table 1)

The prevalence of each comorbidity in men and women were reported in Table 1. The majority of deaths due to AMI occurred in the first 10 days; whereas this trend was not evidence for pneumonia or ADHF (Supplementary figures 1-3). The majority of readmissions for all three conditions occurred in the first 15 days (Supplementary figures 4-6).

### Summary of outcomes

#### ADHF:

12,265 patients were hospitalized with ADHF within the study period, 7,010 men and 5,255 women. Women were older with a mean age of 75.4 years compared to 72.3 years in men. 85.75% of both men and women were Caucasian. 71.94 % of men had multi-comorbidities compared to 69.99 % of women.

After adjusting for age, length of stay, residence place (Olmsted county vs. non-Olmsted), and multi-comorbidities, OR for 30 day mortality for men vs. women was 0.94 (95% CI: 0.82 to 1.07), OR for 30 day readmission 0.90 (95% CI: 0.82 to 0.99). (Table 2), (Figure 1)

A subgroup analysis including patients who had CAD was conducted, OR for 30 day mortality was 0.89 (95% CI: 0.73 to 1.09), and OR for 30 day readmission was 0.90 (95% CI: 0.75 to 1.082).

#### AMI:

1  
2  
3 Of the 15,777 patients hospitalized with AMI 10,280 were men and 5,497 were women.  
4  
5 Women were older, with a mean age of 73 years compared to 66.5 years in men. 86.78%  
6  
7 of patients were Caucasian (87% of men and 86% in women) (Table 1). 46.73 % of men  
8  
9 had multi-comorbidities compared to 52.17 % of women.  
10

11  
12 After adjusting for age, length of stay, residence place (Olmsted county vs. non-  
13  
14 Olmsted), and multi-comorbidities, OR for 30 day mortality for men vs. women was 0.98  
15  
16 (95% CI: 0.86 to 1.11), OR for 30 day readmission 0.90 (95% CI: 0.79 to 1.04). (Table 2)  
17  
18 (Figure 1)  
19

20  
21 A subgroup analysis including patients who had heart failure was conducted, OR for 30  
22  
23 day mortality was 1.18 (95% CI: 1.007 to 1.37), and OR for 30 day readmission: 0.89  
24  
25 (95% CI: 0.72 to 1.09).  
26  
27

### 28 29 **Pneumonia:**

30  
31 Of the 12,929 patients hospitalized with pneumonia within the study period, three were  
32  
33 7,073 men and 5,856 women. Women were older with a mean age of 70.8 compared to  
34  
35 69.2 years in men. 85% of both men and women were Caucasian. 58.89% of men had  
36  
37 multi-comorbidities compared to 55.79% of women.  
38  
39

40  
41 After adjusting for age, length of stay, residence place (Olmsted county vs. non-  
42  
43 Olmsted), and multi-comorbidities, OR for 30 day mortality for men vs. women was 1.19  
44  
45 (95% CI 1.06 to 1.34), OR for 30 day readmission 1.10 (95% CI: 0.99 to 1.23). (Table 2)  
46  
47 (Figure 1)  
48

49  
50 A subgroup analysis including patients who had CAD was conducted, OR for 30 day  
51  
52 mortality was 1.21 (95% CI: 0.93 to 1.56), and OR for 30 day readmission was 1.06  
53  
54 (95% CI: 0.81 to 1.39).  
55  
56  
57  
58  
59



1  
2  
3 A subgroup analysis including patients who had heart failure was conducted, OR for 30  
4 day mortality was 30 day mortality was 1.089 (95% CI: 0.89 to 1.33), and OR for 30 day  
5  
6 readmission: 1.21 (95% CI: 1.007 to 1.46).  
7  
8

### 9 10 **Sensitivity analysis:**

11  
12 To determine the contemporary status of gender disparities and comorbidities, we  
13  
14 conducted a sensitivity analysis focusing on patients who were admitted in the last 5  
15  
16 years. The results were overall consistent with the main analysis, except for 30 day  
17  
18 mortality for pneumonia (which became nonsignificant between men and women  
19  
20 whereas mortality was marginally higher in men, in the original analysis).  
21  
22

23  
24 (Supplementary table 6).  
25

26 We conducted another sensitivity analysis, looking for 15 day mortality and readmission.  
27  
28 There were no statistically significant differences in 15 day readmission between men  
29  
30 and women in all 3 conditions. 15 day mortality was marginally higher for pneumonia in  
31  
32 men OR: 1.15 (95% CI: 1.00 to 1.33) but not statistically significant different in AMI or  
33  
34 ADHF (Supplementary table 7).  
35  
36

### 37 38 **Discussion:**

39  
40 This study suggests that comorbidities are distributed differently between men and  
41  
42 women hospitalized for ADHF, AMI and pneumonia. Despite a fairly large sample size,  
43  
44 this study showed that gender differences appear to have minimal meaningful impact on  
45  
46 outcomes.  
47  
48

49  
50 In AMI, women are known to less commonly report chest pain or discomfort compared  
51  
52 with men, this may lead to gender differences in outcomes of AMI.<sup>20</sup> However, in our  
53  
54 study, the gender difference in 30-day mortality could be explained by the age difference,  
55  
56  
57  
58  
59

1  
2  
3 women were 6.5 years older in average. After adjusting for residency location and  
4  
5 number of comorbidities, age had a significant impact on 30 day mortality, but not gender  
6  
7 or multi-comorbidities. On the other hand, the only factor that had a significant  
8  
9 association with 30 day readmission was multi-comorbidities.  
10

11  
12 In ADHF, men had significantly lower 30 day readmission rate compared to women,  
13  
14 while they did not have a significant difference in 30 day mortality. A sensitivity analysis  
15  
16 including only patients for the last 5 years, showed similar results. Multi-comorbidity did  
17  
18 not have a significant effect on 30 day mortality or readmission. This might be explained  
19  
20 by difference in symptoms presentations, or difference in access to medical care between  
21  
22 men and women. For example, men used to have higher invasive cardiac procedures than  
23  
24 women in a previously published study.<sup>21</sup>  
25  
26

27  
28 Men with pneumonia had significantly higher 30 day mortality compared to women, but  
29  
30 no significant difference in 30 day readmission. Multi-comorbidities had a significant  
31  
32 effect on 30 day readmission in men but not in women.  
33  
34

### 35 **Comparison with existing literature**

36  
37 Our findings in AMI were consistent with previously published studies<sup>12,22</sup> that showed a  
38  
39 higher 30 day mortality rate in women verses men, but no significant difference after  
40  
41 adjustment for other variables. In these studies, they include elderly patients only (> 65  
42  
43 years old) while we had no age restriction, but yet, in all of these studies, women were  
44  
45 older, and had differences in comorbidities compared to men. In ADHF, our results were  
46  
47 consistent with a previously published study that used ADHERE (Acute Decompensated  
48  
49 Heart Failure National Registry) between 2001 and 2004<sup>10</sup>, in both studies there was no  
50  
51 significant difference in in-hospital mortality between men and women.  
52  
53  
54  
55  
56  
57  
58  
59  
60

1  
2  
3 In pneumonia, our study showed that men have worse outcomes than women, unlike a  
4  
5 previous study<sup>14</sup> that found that women have worse outcomes for community-acquired  
6  
7 pneumonia with 28-day mortality odds ratio of 1.15 (95% CI 1.02–1.30). However, our  
8  
9 study included all types of pneumonia, and it was consistent with another study that used  
10  
11 the Medicare database and showed worse outcomes in men<sup>23</sup>.  
12  
13

### 14 15 **Limitations and strengths**

16  
17 A limitation of this study is that we used ICD-9 codes for identifying patients. It was not  
18  
19 feasible to review charts for such a large number of patients; and therefore, we had to  
20  
21 depend on administrative and billing codes. New research using the recent ICD-10  
22  
23 coding is needed to study the consistency of prevalence and implication of comorbidities  
24  
25 on early outcomes in hospitalized patients. Another limitation is that we included all  
26  
27 patients that were hospitalized in a single regional tertiary center; these patients were  
28  
29 from several different states and some from were from other countries. We might have  
30  
31 under estimated the mortality or readmission rates if these patients were readmitted to a  
32  
33 different hospital closer to their residency place after discharge. Making this less  
34  
35 concerning is the fact that we found, gender to be an independent variable from residency  
36  
37 place; in addition, we adjusted for residency place (Olmsted County where the hospital is  
38  
39 vs. non Olmsted County). Another limitation is that the majority of our included patients  
40  
41 were white; our results may not be generalizable to people from other races. Other  
42  
43 limitation in our data is that we have included only the first hospitalization; some patients  
44  
45 have likely had multiple repeat hospitalizations for the same condition. The strengths of  
46  
47 this study include the large sample size, multivariable adjustment and sensitivity analyses  
48  
49 to assess robustness of findings.  
50  
51  
52  
53  
54  
55  
56  
57  
58  
59  
60

**Clinical and policy implication:**

Although this study showed that women hospitalized for ADHF had higher 30 day readmission rate, the absolute risk was small with a number needed to harm of 88 patients (95% CI: 48, 445). For pneumonia, women had lower mortality, with a number needed to harm of 61 patients (95% CI: 36, 202). With this minimal clinically meaningful impact of these differences on the early outcomes of these three important conditions; efforts to address gender difference may need to be diverted towards targeting overall population health, where outcomes of these conditions are still suboptimal in both genders, or towards reducing race/ethnicity disparity, or improving access to care differences.

**Conclusion:**

Gender disparities interact with comorbidities and impact mortality and readmission. However, this effect varies according to the conditions, seems to be unpredictable and has a minimal meaningful impact on outcomes.

**Funding:**

This publication was made possible by CTSA Grant Number UL1 TR000135 from the National Center for Advancing Translational Sciences (NCATS), a component of the National Institutes of Health (NIH). Its contents are solely the responsibility of the authors and do not necessarily represent the official view of NIH.

**Contributors:** MA conception and design of the study, data collection, data analysis, interpreted results, drafted and revised manuscript; ZW data analysis, manuscript revision and approval of final draft; MHM contributed to study design, manuscript development, approval of final draft; MY: developed the idea for the study, interpreted results, revised manuscript, approval of final draft.

1  
2  
3 **Competing interests:** None declared  
4

5 **Ethics approval:** Mayo Clinic Institutional Review Committee (IRB).  
6

7  
8 **Provenance and peer review:** Not commissioned; externally peer reviewed.  
9

10 **Data sharing statement:** No additional data are available.  
11

## 12 **References:**

- 13 1. Jennifer Schwartz P, MPH, Kelly M. Strait M, Amena Keshawarz M, et al. *CMS Medicare Hospital Quality Chartbook, Performance Report on Outcome Measures*. SEPTEMBER 2014.
- 14 2. Pfunter A, Wier LM, Steiner C. Costs for Hospital Stays in the United States, 2010: Statistical Brief #146. In: *Healthcare Cost and Utilization Project (HCUP) Statistical Briefs*. Rockville (MD)2006.
- 15 3. Suter L, Li S-X, Grady J, et al. National Patterns of Risk-Standardized Mortality and Readmission After Hospitalization for Acute Myocardial Infarction, Heart Failure, and Pneumonia: Update on Publicly Reported Outcomes Measures Based on the 2013 Release. *J GEN INTERN MED*. 2014;29(10):1333-1340.
- 16 4. Lindenauer PK, Bernheim SM, Grady JN, et al. The performance of US hospitals as reflected in risk-standardized 30-day mortality and readmission rates for medicare beneficiaries with pneumonia. *J Hosp Med*. 2010;5(6):822.
- 17 5. Khera R, Dharmarajan K, Wang Y, et al. Association of the Hospital Readmissions Reduction Program with mortality during and after hospitalization for acute myocardial infarction, heart failure, and pneumonia. *JAMA Network Open*. 2018;1(5):e182777-e182777.
- 18 6. <https://www.cms.gov/Medicare/Quality-Initiatives-Patient-Assessment-Instruments/HospitalQualityInits/OutcomeMeasures.html>.
- 19 7. Dharmarajan K, Hsieh AF, Lin Z, et al. Diagnoses and timing of 30-day readmissions after hospitalization for heart failure, acute myocardial infarction, or pneumonia. *JAMA*. 2013;309(4):355-363.
- 20 8. Crabtree TD, Pelletier SJ, Gleason TG, Pruett TL, Sawyer RG. Gender-dependent differences in outcome after the treatment of infection in hospitalized patients. *JAMA*. 1999;282(22):2143-2148.
- 21 9. Blomkalns AL, Chen AY, Hochman JS, et al. Gender disparities in the diagnosis and treatment of non-ST-segment elevation acute coronary syndromesLarge-scale observations from the CRUSADE (Can Rapid Risk Stratification of Unstable Angina Patients Suppress Adverse Outcomes With Early Implementation of the American College of Cardiology/American Heart Association Guidelines) National Quality Improvement Initiative. *Journal of the American College of Cardiology*. 2005;45(6):832-837.
- 22 10. Galvao M, Kalman J, DeMarco T, et al. Gender differences in in-hospital management and outcomes in patients with decompensated heart failure: analysis from the Acute Decompensated Heart Failure National Registry (ADHERE). *J Card Fail*. 2006;12(2):100-107.

11. Thomsen RW, Riis A, Norgaard M, et al. Rising incidence and persistently high mortality of hospitalized pneumonia: a 10-year population-based study in Denmark. *J Intern Med*. 2006;259(4):410-417.
12. Berger JS, Elliott L, Gallup D, et al. SEx differences in mortality following acute coronary syndromes. *JAMA*. 2009;302(8):874-882.
13. Vaccarino V, Parsons L, Every NR, Barron HV, Krumholz HM. Sex-Based Differences in Early Mortality after Myocardial Infarction. *New England Journal of Medicine*. 1999;341(4):217-225.
14. Arnold FW, Wiemken TL, Peyrani P, Mirsaeidi M, Ramirez JA. Outcomes in females hospitalised with community-acquired pneumonia are worse than in males. *Eur Respir J*. 2013;41(5):1135-1140.
15. Dey S, Flather MD, Devlin G, et al. Sex-related differences in the presentation, treatment and outcomes among patients with acute coronary syndromes: the Global Registry of Acute Coronary Events. *Heart*. 2009;95(1):20-26.
16. Boyd CM, Fortin M. Future of multimorbidity research: how should understanding of multimorbidity inform health system design. *Public Health Rev*. 2010;32(2):451-474.
17. Weiss CO, Boyd CM, Yu Q, Wolff JL, Leff B. Patterns of prevalent major chronic disease among older adults in the United States. *JAMA*. 2007;298(10):1160-1162.
18. Abad-Diez JM, Calderon-Larranaga A, Poncel-Falco A, et al. Age and gender differences in the prevalence and patterns of multimorbidity in the older population. *BMC Geriatr*. 2014;14:75.
19. Goodman RA, Posner SF, Huang ES, Parekh AK, Koh HK. Defining and measuring chronic conditions: imperatives for research, policy, program, and practice. *Prev Chronic Dis*. 2013;10:E66.
20. Canto JG, Goldberg RJ, Hand MM, et al. Symptom presentation of women with acute coronary syndromes: myth vs reality. *Arch Intern Med*. 2007;167(22):2405-2413.
21. Giles WH, Anda RF, Casper ML, Escobedo LG, Taylor HA. Race and sex differences in rates of invasive cardiac procedures in US hospitals. Data from the National Hospital Discharge Survey. *Arch Intern Med*. 1995;155(3):318-324.
22. Canto JG, Rogers WJ, Goldberg RJ, et al. Association of age and sex with myocardial infarction symptom presentation and in-hospital mortality. *JAMA*. 2012;307(8):813-822.
23. Kaplan V, Angus DC, Griffin MF, Clermont G, Scott Watson R, Linde-Zwirble WT. Hospitalized community-acquired pneumonia in the elderly: age- and sex-related patterns of care and outcome in the United States. *Am J Respir Crit Care Med*. 2002;165(6):766-772.

1  
2  
3 **Legends:**  
4

5 **Table 1: Baseline characteristics**  
6

7 **Table 2: Adjusted outcomes**  
8

9 **Figure 1: Adjusted outcomes 30 day mortality and 30 day readmission in men vs.**  
10 **women.**  
11  
12  
13  
14  
15  
16  
17  
18  
19  
20  
21  
22  
23  
24  
25  
26  
27  
28  
29  
30  
31  
32  
33  
34  
35  
36  
37  
38  
39  
40  
41  
42  
43  
44  
45  
46  
47  
48  
49  
50  
51  
52  
53  
54  
55  
56  
57  
58  
59  
60

For peer review only

**Table 1: Baseline characteristics**

|                       | AMI = 15,777   |                |         | ADHF =12,265    |                |            | Pneumonia = 12,929 |                |            |
|-----------------------|----------------|----------------|---------|-----------------|----------------|------------|--------------------|----------------|------------|
|                       | Men<br>65%     | Women<br>35%   | P value | Men<br>57%      | Women<br>43%   | P<br>value | Men<br>55%         | Women<br>45%   | P<br>value |
| <b>Age (SD)</b>       | 66.5<br>(13.3) | 73 (13.3)      | <0.001  | 72.3<br>(13)    | 75.4<br>(13.9) | <0.001     | 69.2<br>(16.8)     | 70.8<br>(17.7) | <0.001     |
| <b>Race %</b>         |                |                |         |                 |                |            |                    |                |            |
| <b>Non-white</b>      | 12.74%         | 14.12%         | 0.015   | 14.25%          | 14.25%         | 0.997      | 15.65%             | 14.70%         | 0.14       |
| <b>White</b>          | 87.26%         | 85.88%         |         | 85.75%          | 85.75%         |            | 84.35%             | 85.30%         |            |
| <b>Comorbidity</b>    |                |                |         |                 |                |            |                    |                |            |
| <b>Arthritis</b>      | 3.37%          | 5.57%          | 0.06    | 4.35%           | 6.95%          | <0.001     | 4.28%              | 7.26%          | <0.001     |
| <b>Asthma</b>         | 2.42%          | 3.89%          | <0.001  | 2.81%           | 5.25%          | <0.001     | 5.09%              | 10.31%         | <0.001     |
| <b>Dementia</b>       | 1.73%          | 3.29%          | <0.001  | 2.65%           | 4.17%          | <0.001     | 6.9%               | 8.52%          | 0.001      |
| <b>Depression</b>     | 4.4%           | 6.8%           | <0.001  | 6.28%           | 9.12%          | <0.001     | 8.64%              | 12.93%         | <0.001     |
| <b>Hypertension</b>   | 57.64%         | 65.69%         | <0.001  | 56.52%          | 62.11%         | <0.001     | 43.91%             | 48.80%         | <0.001     |
| <b>Osteoporosis</b>   | 0.4%           | 4.73%          | <0.001  | 0.97%           | 7.16%          | <0.001     | 2.09%              | 9.00%          | <0.001     |
| <b>Cancer</b>         | 8.14%          | 6.95%          | 0.01    | 13.42%          | 11.91%         | 0.01       | 25.93%             | 17.81%         | <0.001     |
| <b>Drug abuse</b>     | 4.15%          | 1.47%          | <0.001  | 3.65%           | 0.97%          | <0.001     | 4.54%              | 2.36%          | <0.001     |
| <b>Dyslipidemia</b>   | 44.46%         | 40.40%         | <0.001  | 1.06%           | 27.73%         | <0.001     | 20.54%             | 17.71%         | <0.001     |
| <b>CAD</b>            |                |                |         | 56.98%          | 41.27%         | <0.001     | 27.29%             | 17.78%         | <0.001     |
| <b>CHF</b>            | 21.15%         | 29.03%         | <0.001  |                 |                |            | 20.44%             | 21.36%         | 0.20       |
| <b>CKD</b>            | 9.49%          | 9.24%          | 0.60    | 27.93%          | 21.62%         | <0.001     | 15.28%             | 10.71%         | <0.001     |
| <b>COPD</b>           | 11.02%         | 10.84%         | 0.73    | 23.50%          | 16.67%         | <0.001     | 28.19%             | 22.8%          | <0.001     |
| <b>Diabetes</b>       | 26.18%         | 29.62%         | <0.001  | 33.75%          | 32.31%         | 0.09       | 22.78%             | 19.31%         | <0.001     |
| <b>Arrhythmia</b>     | 25.62%         | 27.03%         | 0.06    | 60.93%          | 54.23%         | <0.001     | 28.36%             | 24.80%         | <0.001     |
| <b>Stroke</b>         | 3.35%          | 4.49%          | <0.001  | 2.84%           | 2.42%          | 0.15       | 2.52%              | 1.67%          | 0.001      |
| <b>Length of stay</b> |                |                |         |                 |                |            |                    |                |            |
| <b>Mean (SD)</b>      | 5.42<br>(5.83) | 5.67<br>(5.76) | 0.01    | 6.02<br>(10.22) | 5.71<br>(8.33) | 0.07       | 5.36<br>(6.01)     | 5.13<br>(6.41) | 0.04       |

AA: African American, ADHF: acute decompensated heart failure, AMI: acute myocardial infarction, CAD: Coronary artery disease, CHF: Congestive heart failure, CKD: chronic kidney disease, COPD: Chronic Obstructive Pulmonary Disease, NA: Native American, SD: standard deviation.



**Table 2: Adjusted outcomes**

| Men vs. Women      | AMI                     |         | ADHF                    |         | Pneumonia               |         |
|--------------------|-------------------------|---------|-------------------------|---------|-------------------------|---------|
|                    | Effect size (95% CI)    | P value | OR (95% CI)             | P value | OR (95% CI)             | P value |
| 30 day mortality   | OR: 0.98 (0.86 to 1.11) | 0.71    | OR: 0.94 (0.82 to 1.07) | 0.39    | OR: 1.19 (1.06 to 1.34) | 0.004   |
| 30 day readmission | OR: 0.90 (0.79 to 1.04) | 0.16    | OR: 0.90 (0.82 to 0.99) | 0.03    | OR: 1.10 (0.99 to 1.23) | 0.08    |

ADHF: acute decompensated heart failure, AMI: acute myocardial infarction, LOS: length of stay, OR: odds ratio.

1  
2  
3  
4  
5  
6  
7  
8  
9  
10  
11  
12  
13  
14  
15  
16  
17  
18  
19  
20  
21  
22  
23  
24  
25  
26  
27  
28  
29  
30  
31  
32  
33  
34  
35  
36  
37  
38  
39  
40  
41  
42  
43  
44  
45  
46  
47  
48  
49

Outcome

OR (95% CI)

30 day mortality

AMI

0.98 (0.86, 1.11)

ADHF

0.94 (0.82, 1.07)

Pneumonia

1.19 (1.06, 1.34)

30 day readmission

AMI

0.90 (0.79, 1.04)

ADHF

0.90 (0.82, 0.99)

Pneumonia

1.10 (0.99, 1.23)

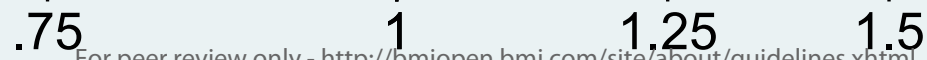

**Supplementary Table 1: ICD9 codes used in ADHF:**

| ICD-9  | Frequency | %     |
|--------|-----------|-------|
| 428    | 8,665     | 70.65 |
| 428.1  | 97        | 0.79  |
| 428.2  | 7         | 0.06  |
| 428.21 | 305       | 2.49  |
| 428.22 | 99        | 0.81  |
| 428.23 | 1,021     | 8.32  |
| 428.3  | 24        | 0.2   |
| 428.31 | 243       | 1.98  |
| 428.32 | 80        | 0.65  |
| 428.33 | 787       | 6.42  |
| 428.4  | 6         | 0.05  |
| 428.41 | 109       | 0.89  |
| 428.42 | 50        | 0.41  |
| 428.43 | 742       | 6.05  |
| 428.9  | 30        | 0.24  |
| Total  | 12,265    | 100   |

Frequency: Number of patients that were diagnosed based on that code.

#: The percentage of the code out of total number of patients

**Supplementary Table 2: ICD9 codes used in AMI.**

| <b>ICD-9</b> | <b>Frequency</b> | <b>%</b>   |
|--------------|------------------|------------|
| 410          | 3                | 0.02       |
| 410.01       | 536              | 3.4        |
| 410.02       | 2                | 0.01       |
| 410.1        | 34               | 0.22       |
| 410.11       | 2,186            | 13.86      |
| 410.12       | 11               | 0.07       |
| 410.2        | 5                | 0.03       |
| 410.21       | 466              | 2.95       |
| 410.22       | 3                | 0.02       |
| 410.3        | 4                | 0.03       |
| 410.31       | 309              | 1.96       |
| 410.32       | 2                | 0.01       |
| 410.4        | 9                | 0.06       |
| 410.41       | 2,688            | 17.04      |
| 410.42       | 17               | 0.11       |
| 410.5        | 4                | 0.03       |
| 410.51       | 256              | 1.62       |
| 410.52       | 2                | 0.01       |
| 410.6        | 1                | 0.01       |
| 410.61       | 75               | 0.48       |
| 410.7        | 25               | 0.16       |
| 410.71       | 8,345            | 52.89      |
| 410.72       | 58               | 0.37       |
| 410.8        | 6                | 0.04       |
| 410.81       | 331              | 2.1        |
| 410.82       | 2                | 0.01       |
| 410.9        | 7                | 0.04       |
| 410.91       | 389              | 2.47       |
| 410.92       | 1                | 0.01       |
| <b>Total</b> | <b>15,777</b>    | <b>100</b> |

Frequency: Number of patients that were diagnosed based on that code.

#: The percentage of the code out of total number of patients

**Supplementary Table 3: ICD9 codes used in pneumonia:**

| ICD-9  | Frequency | %    |
|--------|-----------|------|
| 11.6   | 1         | 0.01 |
| 11.64  | 1         | 0.01 |
| 52.1   | 10        | 0.08 |
| 73     | 2         | 0.02 |
| 115.05 | 68        | 0.53 |
| 115.95 | 29        | 0.22 |
| 480    | 1         | 0.01 |
| 480.1  | 67        | 0.52 |
| 480.2  | 1         | 0.01 |
| 480.3  | 1         | 0.01 |
| 480.8  | 12        | 0.09 |
| 480.9  | 57        | 0.44 |
| 481    | 431       | 3.33 |
| 482    | 68        | 0.53 |
| 482.1  | 208       | 1.61 |
| 482.2  | 163       | 1.26 |
| 482.3  | 57        | 0.44 |
| 482.31 | 11        | 0.09 |
| 482.32 | 6         | 0.05 |
| 482.39 | 15        | 0.12 |
| 482.4  | 66        | 0.51 |
| 482.41 | 140       | 1.08 |
| 482.42 | 57        | 0.44 |
| 482.49 | 2         | 0.02 |
| 482.81 | 8         | 0.06 |
| 482.82 | 33        | 0.26 |
| 482.83 | 118       | 0.91 |
| 482.84 | 46        | 0.36 |
| 482.89 | 42        | 0.32 |
| 482.9  | 143       | 1.11 |
| 483    | 25        | 0.19 |
| 483.8  | 5         | 0.04 |
| 484.1  | 3         | 0.02 |
| 484.6  | 1         | 0.01 |
| 485    | 104       | 0.8  |
| 486    | 8,520     | 65.9 |
| 487    | 234       | 1.81 |
| 495.8  | 4         | 0.03 |
| 495.9  | 62        | 0.48 |
| 506    | 12        | 0.09 |
| 507    | 2,081     | 16.1 |
| 507.1  | 6         | 0.05 |
| 507.8  | 2         | 0.02 |
| 997.32 | 6         | 0.05 |
| Total  | 12,929    | 100  |

Frequency: Number of patients that were diagnosed based on that code.

%: The percentage of the code out of total number of patients

**Supplementary Table 4: Comorbidities specified by OASH.**

|              |                          |            |               |
|--------------|--------------------------|------------|---------------|
| Dyslipidemia | Coronary Artery Disease  | Depression | COPD          |
| Arthritis    | Substance abuse          | Diabetes   | Dementia      |
| Osteoporosis | Congestive Heart Failure | Cancer     | Schizophrenia |
| Autism       | Chronic Kidney Disease   | Arrhythmia | Hepatitis     |
| Hypertension | Stroke                   | Asthma     | HIV           |

**Supplementary Table 5: List of ICD-9 codes used for the comorbidities:**

| The condition           | ICD-9 codes used:                                                                                                                                                                                                                                                                                                                                                                                                                                                                                                                                                                                                                                                                                                              |
|-------------------------|--------------------------------------------------------------------------------------------------------------------------------------------------------------------------------------------------------------------------------------------------------------------------------------------------------------------------------------------------------------------------------------------------------------------------------------------------------------------------------------------------------------------------------------------------------------------------------------------------------------------------------------------------------------------------------------------------------------------------------|
| Dyslipidemia            | 272.0, 272.1, 272.2, 272.3, 272.4                                                                                                                                                                                                                                                                                                                                                                                                                                                                                                                                                                                                                                                                                              |
| Arthritis               | 714.0, 714.1, 714.2, 714.30, 714.31, 714.32, 714.33, 715.00, 715.04, 715.09, 715.10, 715.11, 715.12, 715.13, 715.14, 715.15, 715.16, 715.17, 715.18, 715.20, 715.21, 715.22, 715.23, 715.24, 715.25, 715.26, 715.27, 715.28, 715.30, 715.31, 715.32, 715.33, 715.34, 715.35, 715.36, 715.37, 715.38, 715.80, 715.89, 715.90, 715.91, 715.92, 715.93, 715.94, 715.95, 715.96, 715.97, 715.98, 720.0, 721.0, 721.1, 721.2, 721.3, 721.90, 721.91                                                                                                                                                                                                                                                                                 |
| Osteoporosis            | 733.00, 733.01, 733.02, 733.03, 733.09                                                                                                                                                                                                                                                                                                                                                                                                                                                                                                                                                                                                                                                                                         |
| Hypertension            | 401.0, 401.1, 401.9, 402.00, 402.01, 402.10, 402.11, 402.90, 402.91, 403.00, 403.01, 403.10, 403.11, 403.90, 403.91, 404.00, 404.01, 404.02, 404.03, 404.10, 404.11, 404.12, 404.13, 404.90, 404.91, 404.92, 404.93, 405.01, 405.09, 405.11, 405.19, 405.91, 405.99, 362.11, 437.2                                                                                                                                                                                                                                                                                                                                                                                                                                             |
| Coronary Artery Disease | 410.00, 410.01, 410.02, 410.10, 410.11, 410.12, 410.20, 410.21, 410.22, 410.30, 410.31, 410.32, 410.40, 410.41, 410.42, 410.50, 410.51, 410.52, 410.60, 410.61, 410.62, 410.70, 410.71, 410.72, 410.80, 410.81, 410.82, 410.90, 410.91, 410.92, 411.0, 411.1, 411.81, 411.89, 412, 413.0, 413.1, 413.9, 414.00, 414.01, 414.02, 414.03, 414.04, 414.05, 414.06, 414.07, 414.12, 414.2, 414.3, 414.8, 414.9                                                                                                                                                                                                                                                                                                                     |
| COPD                    | 490, 491.0, 491.1, 491.20, 491.21, 491.22, 491.8, 491.9, 492.0, 492.8, 494.0, 494.1, 496                                                                                                                                                                                                                                                                                                                                                                                                                                                                                                                                                                                                                                       |
| Chronic Kidney Disease  | 016.00, 016.01, 016.02, 016.03, 016.04, 016.05, 016.06, 095.4, 189.0, 189.9, 223.0, 236.91, 249.40, 249.41, 250.40, 250.41, 250.42, 250.43, 271.4, 274.10, 283.11, 403.01, 403.11, 403.91, 404.02, 404.03, 404.12, 404.13, 404.92, 404.93, 440.1, 442.1, 572.4, 580.0, 580.4, 580.81, 580.89, 580.9, 581.0, 581.1, 581.2, 581.3, 581.81, 581.89, 581.9, 582.0, 582.1, 582.2, 582.4, 582.81, 582.89, 582.9, 583.0, 583.1, 583.2, 583.4, 583.6, 583.7, 583.81, 583.89, 583.9, 584.5, 584.6, 584.7, 584.8, 584.9, 585, 585.1, 585.2, 585.3, 585.4, 585.5, 585.6, 585.9, 586, 587, 588.0, 588.1, 588.81, 588.89, 588.9, 591, 753.12, 753.13, 753.14, 753.15, 753.16, 753.17, 753.19, 753.20, 753.21, 753.22, 753.23, 753.29, 794.4 |
| Stroke                  | 430, 431, 433.01, 433.11, 433.21, 433.31, 433.81, 433.91, 434.00, 434.01, 434.10, 434.11, 434.90, 434.91, 435.0, 435.1, 435.3, 435.8, 435.9, 436, 997.02                                                                                                                                                                                                                                                                                                                                                                                                                                                                                                                                                                       |
| Depression              | 296.20, 296.21, 296.22, 296.23, 296.24, 296.25, 296.26, 296.30, 296.31, 296.32, 296.33, 296.34, 296.35, 296.36, 296.51, 296.52, 296.53, 296.54, 296.55, 296.56, 296.60, 296.61, 296.62, 296.63, 296.64, 296.65, 296.66, 296.89, 298.0, 300.4, 309.1, 311                                                                                                                                                                                                                                                                                                                                                                                                                                                                       |
| Diabetes                | 249.00, 249.01, 249.10, 249.11, 249.20, 249.21, 249.30, 249.31, 249.40, 249.41, 249.50, 249.51, 249.60, 249.61, 249.70, 249.71, 249.80, 249.81, 249.90, 249.91, 250.00, 250.01, 250.02, 250.03,                                                                                                                                                                                                                                                                                                                                                                                                                                                                                                                                |

|                          |                                                                                                                                                                                                                                                                                                                                                                   |
|--------------------------|-------------------------------------------------------------------------------------------------------------------------------------------------------------------------------------------------------------------------------------------------------------------------------------------------------------------------------------------------------------------|
|                          | 250.10, 250.11, 250.12, 250.13, 250.20, 250.21, 250.22, 250.23, 250.30, 250.31, 250.32, 250.33, 250.40, 250.41, 250.42, 250.43, 250.50, 250.51, 250.52, 250.53, 250.60, 250.61, 250.62, 250.63, 250.70, 250.71, 250.72, 250.73, 250.80, 250.81, 250.82, 250.83, 250.90, 250.91, 250.92, 250.93, 357.2, 362.01, 362.02, 366.41                                     |
| Cancer                   | Female breast cancer: 174.0, 174.1, 174.2, 174.3, 174.4, 174.5, 174.6, 174.8, 174.9, 175.0, 175.9, 233.0, V10.3.<br>Colorectal cancer: 154.0, 154.1, 153.0, 153.1, 153.2, 153.3, 153.4, 153.5, 153.6, 153.7, 153.8, 153.9, 230.3, 230.4, V10.05.<br>Prostate cancer: 185, 233.4, V10.46.<br>Lung cancer: 162.2, 162.3, 162.4, 162.5, 162.8, 162.9, 231.2, V10.11. |
| Arrhythmia               | 427.31                                                                                                                                                                                                                                                                                                                                                            |
| Asthma                   | 493.00, 493.01, 493.02, 493.10, 493.11, 493.12, 493.20, 493.21, 493.22, 493.81, 493.82, 493.90, 493.91, 493.92                                                                                                                                                                                                                                                    |
| Congestive Heart Failure | 398.91, 402.01, 402.11, 402.91, 404.01, 404.11, 404.91, 404.03, 404.13, 404.93, 428.0, 428.1, 428.20, 428.21, 428.22, 428.23, 428.30, 428.31, 428.32, 428.33, 428.40, 428.41, 428.42, 428.43, 428.9                                                                                                                                                               |
| Dementia                 | 331.0, 331.1, 331.11, 331.19, 331.2, 331.7, 290.0, 290.10, 290.11, 290.12, 290.13, 290.20, 290.21, 290.3, 290.40, 290.41, 290.42, 290.43, 294.0, 294.10, 294.11, 294.8, 797                                                                                                                                                                                       |



**Supplementary Table 6: sensitivity analysis for the last 5 years of the study**

| <b>Last 5 years</b>       | <b>AMI</b>          | <b>ADHF</b>         | <b>Pneumonia</b>    |
|---------------------------|---------------------|---------------------|---------------------|
| <b>Men vs. Women</b>      | <b>OR (95% CI)</b>  | <b>OR (95% CI)</b>  | <b>OR (95% CI)</b>  |
| <b>30 day mortality</b>   | 1.02 (0.73 to 1.43) | 0.81 (0.62 to 1.06) | 1.12 (0.85 to 1.47) |
| <b>30 day readmission</b> | 0.85 (0.63 to 1.15) | 0.78 (0.63 to 0.97) | 0.94 (0.74 to 1.20) |

For peer review only

**Supplementary Table 7: sensitivity analysis for 15 day mortality and readmission**

| <b>Last 5 years</b>       | <b>AMI</b>          | <b>ADHF</b>         | <b>Pneumonia</b>    |
|---------------------------|---------------------|---------------------|---------------------|
| <b>Men vs. Women</b>      | <b>OR (95% CI)</b>  | <b>OR (95% CI)</b>  | <b>OR (95% CI)</b>  |
| <b>15 day mortality</b>   | 1.00 (0.88 to 1.15) | 0.88 (0.73 to 1.05) | 1.15 (1.00 to 1.33) |
| <b>15 day readmission</b> | 0.91 (0.81 to 1.03) | 0.93 (0.81 to 1.06) | 1.10 (0.96 to 1.27) |

For peer review only

Supplementary Figure 1: 30 day mortality in AMI



Peer review only

1  
2  
3  
4  
5  
6  
7  
8  
9  
10  
11  
12  
13  
14  
15  
16  
17  
18  
19  
20  
21  
22  
23  
24  
25  
26  
27  
28  
29  
30  
31  
32  
33  
34  
35  
36  
37  
38  
39  
40  
41  
42  
43  
44  
45  
46  
47  
48  
49  
50  
51  
52  
53  
54  
55  
56  
57  
58  
59  
60

Supplementary Figure 2: 30 day mortality in ADHF



Supplementary Figure 3: 30 day mortality in pneumonia

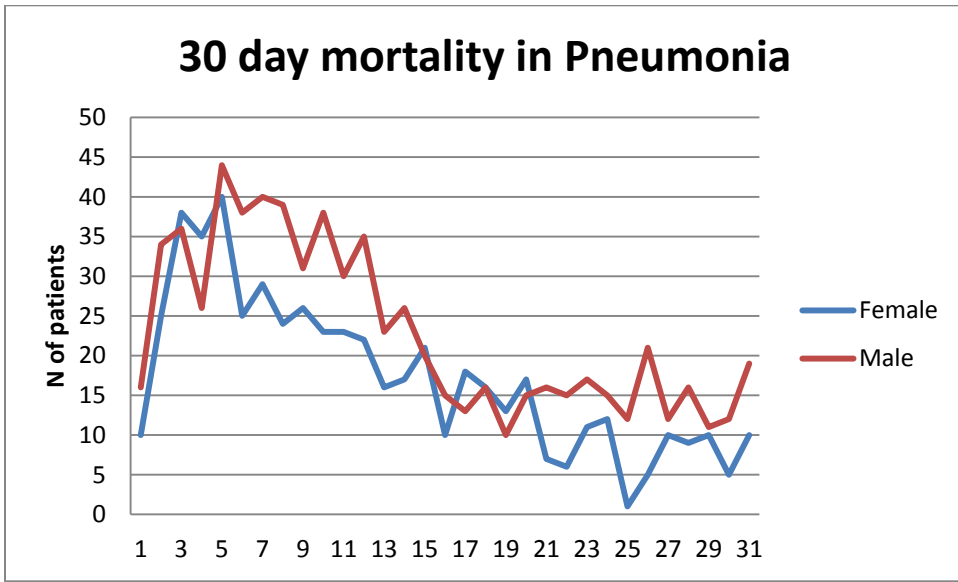

1  
2  
3  
4  
5  
6  
7  
8  
9  
10  
11  
12  
13  
14  
15  
16  
17  
18  
19  
20  
21  
22  
23  
24  
25  
26  
27  
28  
29  
30  
31  
32  
33  
34  
35  
36  
37  
38  
39  
40  
41  
42  
43  
44  
45  
46  
47  
48  
49  
50  
51  
52  
53  
54  
55  
56  
57  
58  
59  
60

Supplementary Figure 4: 30 day readmission in AMI



Supplementary Figure 5: 30 day readmission in ADHF



1  
2  
3  
4  
5  
6  
7  
8  
9  
10  
11  
12  
13  
14  
15  
16  
17  
18  
19  
20  
21  
22  
23  
24  
25  
26  
27  
28  
29  
30  
31  
32  
33  
34  
35  
36  
37  
38  
39  
40  
41  
42  
43  
44  
45  
46  
47  
48  
49  
50  
51  
52  
53  
54  
55  
56  
57  
58  
59  
60

Supplementary Figure 6: 30 day readmission in pneumonia





## STROBE Statement—checklist of items that should be included in reports of observational studies

|                           | Item No | Recommendation                                                                                                                                                                                                                                                                                                                                                                                                                                                         | Page number |
|---------------------------|---------|------------------------------------------------------------------------------------------------------------------------------------------------------------------------------------------------------------------------------------------------------------------------------------------------------------------------------------------------------------------------------------------------------------------------------------------------------------------------|-------------|
| <b>Title and abstract</b> | 1       | (a) Indicate the study's design with a commonly used term in the title or the abstract                                                                                                                                                                                                                                                                                                                                                                                 | 1           |
|                           |         | (b) Provide in the abstract an informative and balanced summary of what was done and what was found                                                                                                                                                                                                                                                                                                                                                                    | 2           |
| <b>Introduction</b>       |         |                                                                                                                                                                                                                                                                                                                                                                                                                                                                        |             |
| Background/rationale      | 2       | Explain the scientific background and rationale for the investigation being reported                                                                                                                                                                                                                                                                                                                                                                                   | 5           |
| Objectives                | 3       | State specific objectives, including any prespecified hypotheses                                                                                                                                                                                                                                                                                                                                                                                                       | 6-7         |
| <b>Methods</b>            |         |                                                                                                                                                                                                                                                                                                                                                                                                                                                                        |             |
| Study design              | 4       | Present key elements of study design early in the paper                                                                                                                                                                                                                                                                                                                                                                                                                | 8           |
| Setting                   | 5       | Describe the setting, locations, and relevant dates, including periods of recruitment, exposure, follow-up, and data collection                                                                                                                                                                                                                                                                                                                                        | 8           |
| Participants              | 6       | (a) <i>Cohort study</i> —Give the eligibility criteria, and the sources and methods of selection of participants. Describe methods of follow-up<br><i>Case-control study</i> —Give the eligibility criteria, and the sources and methods of case ascertainment and control selection. Give the rationale for the choice of cases and controls<br><i>Cross-sectional study</i> —Give the eligibility criteria, and the sources and methods of selection of participants | 8           |
|                           |         | (b) <i>Cohort study</i> —For matched studies, give matching criteria and number of exposed and unexposed<br><i>Case-control study</i> —For matched studies, give matching criteria and the number of controls per case                                                                                                                                                                                                                                                 |             |
| Variables                 | 7       | Clearly define all outcomes, exposures, predictors, potential confounders, and effect modifiers. Give diagnostic criteria, if applicable                                                                                                                                                                                                                                                                                                                               | 8-9         |
| Data sources/measurement  | 8*      | For each variable of interest, give sources of data and details of methods of assessment (measurement). Describe comparability of assessment methods if there is more than one group                                                                                                                                                                                                                                                                                   | 9           |
| Bias                      | 9       | Describe any efforts to address potential sources of bias                                                                                                                                                                                                                                                                                                                                                                                                              | 9           |
| Study size                | 10      | Explain how the study size was arrived at                                                                                                                                                                                                                                                                                                                                                                                                                              | 9           |
| Quantitative variables    | 11      | Explain how quantitative variables were handled in the analyses. If applicable, describe which groupings were chosen and why                                                                                                                                                                                                                                                                                                                                           |             |
| Statistical methods       | 12      | (a) Describe all statistical methods, including those used to control for confounding                                                                                                                                                                                                                                                                                                                                                                                  | 9           |
|                           |         | (b) Describe any methods used to examine subgroups and interactions                                                                                                                                                                                                                                                                                                                                                                                                    |             |
|                           |         | (c) Explain how missing data were addressed                                                                                                                                                                                                                                                                                                                                                                                                                            |             |
|                           |         | (d) <i>Cohort study</i> —If applicable, explain how loss to follow-up was addressed<br><i>Case-control study</i> —If applicable, explain how matching of cases and controls was addressed<br><i>Cross-sectional study</i> —If applicable, describe analytical methods taking account of sampling strategy                                                                                                                                                              |             |
|                           |         | (e) Describe any sensitivity analyses                                                                                                                                                                                                                                                                                                                                                                                                                                  |             |

1  
2 Continued on next page

| <b>Results</b>           |                                                                                                                                                                                                                                                                                                                                                                                                                  | <b>Page number</b> |
|--------------------------|------------------------------------------------------------------------------------------------------------------------------------------------------------------------------------------------------------------------------------------------------------------------------------------------------------------------------------------------------------------------------------------------------------------|--------------------|
| Participants             | 13* (a) Report numbers of individuals at each stage of study—eg numbers potentially eligible, examined for eligibility, confirmed eligible, included in the study, completing follow-up, and analysed<br>(b) Give reasons for non-participation at each stage<br>(c) Consider use of a flow diagram                                                                                                              | 10                 |
| Descriptive data         | 14* (a) Give characteristics of study participants (eg demographic, clinical, social) and information on exposures and potential confounders<br>(b) Indicate number of participants with missing data for each variable of interest<br>(c) <i>Cohort study</i> —Summarise follow-up time (eg, average and total amount)                                                                                          | 10                 |
| Outcome data             | 15* <i>Cohort study</i> —Report numbers of outcome events or summary measures over time<br><i>Case-control study</i> —Report numbers in each exposure category, or summary measures of exposure<br><i>Cross-sectional study</i> —Report numbers of outcome events or summary measures                                                                                                                            | 10-12              |
| Main results             | 16 (a) Give unadjusted estimates and, if applicable, confounder-adjusted estimates and their precision (eg, 95% confidence interval). Make clear which confounders were adjusted for and why they were included<br>(b) Report category boundaries when continuous variables were categorized<br>(c) If relevant, consider translating estimates of relative risk into absolute risk for a meaningful time period | 10-12              |
| Other analyses           | 17 Report other analyses done—eg analyses of subgroups and interactions, and sensitivity analyses                                                                                                                                                                                                                                                                                                                | 12                 |
| <b>Discussion</b>        |                                                                                                                                                                                                                                                                                                                                                                                                                  |                    |
| Key results              | 18 Summarise key results with reference to study objectives                                                                                                                                                                                                                                                                                                                                                      | 12-13              |
| Limitations              | 19 Discuss limitations of the study, taking into account sources of potential bias or imprecision. Discuss both direction and magnitude of any potential bias                                                                                                                                                                                                                                                    | 14                 |
| Interpretation           | 20 Give a cautious overall interpretation of results considering objectives, limitations, multiplicity of analyses, results from similar studies, and other relevant evidence                                                                                                                                                                                                                                    | 15                 |
| Generalisability         | 21 Discuss the generalisability (external validity) of the study results                                                                                                                                                                                                                                                                                                                                         | 14                 |
| <b>Other information</b> |                                                                                                                                                                                                                                                                                                                                                                                                                  |                    |
| Funding                  | 22 Give the source of funding and the role of the funders for the present study and, if applicable, for the original study on which the present article is based                                                                                                                                                                                                                                                 | 15                 |

49 \*Give information separately for cases and controls in case-control studies and, if applicable, for exposed and unexposed groups in cohort and cross-sectional studies.

53 **Note:** An Explanation and Elaboration article discusses each checklist item and gives methodological background and published examples of transparent reporting. The STROBE checklist is best used in conjunction with this article (freely available on the Web sites of PLoS Medicine at <http://www.plosmedicine.org/>, Annals of Internal Medicine at <http://www.annals.org/>, and Epidemiology at <http://www.epidem.com/>). Information on the STROBE Initiative is available at [www.strobe-statement.org](http://www.strobe-statement.org).
